# Supplementary material for: Sequencing and Comparative Analysis of the Straw Mushroom (Volvariella volvacea) Genome
Source: PLoS One. 2013 Mar 19;8(3):e58294. doi: 10.1371/journal.pone.0058294 (PMC3602538; doi:10.1371/journal.pone.0058294)
Supplement: Table S6 — The microsatellite sites in V. volvacea genome. (XLSX) [file pone.0058294.s015.xlsx]

## Sheet: Table S6
Table S6. The microsatellite sites in V. volvacea genome
Seq_Name	Motif	Motif_Standardised	SSR_Start	SSR_End	Length	Mismatches	Sequence
VVO_S00001	GAG	AGG	2940668	2940701	34	3	GGAGGATGGAGGATGAGTGAGGAGGAGGAGGAGG
VVO_S00001	CTCTT	AAGAG	3418883	3418916	34	3	CTCTTCTCTTCTCTTCGCTCTCTTTCTTCTCTTC
VVO_S00001	TGG	ACC	3470394	3470443	50	3	TGGTGGTGGTGGTgGTGGTGGTGGTGGTGGTGATGGTGGTGGGTGGTGGT
VVO_S00001	CTTCTC	AAGGAG	123161	123191	31	2	CTTCTCCTTCTCCTTCTCCCTCTCCCTCTCC
VVO_S00001	GAG	AGG	289602	289629	28	2	AGGAGGAGCAGGAGGAAGAGGAGGAGGA
VVO_S00001	TC	AG	296600	296626	27	2	TCTCTCTCTCTTCTCTCTCATCTCTCT
VVO_S00001	GAT	ATC	398231	398261	31	2	ATGATGAAGATGAAGATGATGATGATGATGA
VVO_S00001	TGTA	ATAC	526253	526284	32	2	TGTATGTATGTAAGTTGTATGTATGTATGTAT
VVO_S00001	CTTTT	AAAAG	721583	721613	31	2	TTTTCTTTTCTCTTTCCTTTTCTTTTCTTTT
VVO_S00001	CCT	AGG	1065147	1065177	31	2	CCTCCTCCTCCTCcTCCTCCTCCTCTTCCTC
VVO_S00001	TGGATA	ATATCC	1448885	1448918	34	2	TGGATATGGATATGGATAGGGACATGGATATGGA
VVO_S00001	CCGCGA	ACCGCG	3742231	3742262	32	2	CCGCGACCGCGACCGCGACCACGACCACGACC
VVO_S00001	TCACC	ACCTC	51693	51718	26	1	CTCACCTCACTTCACCTCACCTCACC
VVO_S00001	TGGCG	ACGCC	60962	60984	23	1	GCGTGGCATGGCGTGGCGTGGCG
VVO_S00001	CGAGTT	AACTCG	261489	261512	24	1	CGAGTCCGAGTTCGAGTTCGAGTT
VVO_S00001	AGG	AGG	289665	289687	23	1	AGGAGAAGGAGGAGGAGGAGGAG
VVO_S00001	GAA	AAG	352164	352186	23	1	GAAGAAGAAGAAGAAGACGAAGA
VVO_S00001	GCA	AGC	475907	475927	21	1	GCAGCAGCAGCAGAAGCAGCA
VVO_S00001	CCCCGC	CCCCCG	1375769	1375792	24	1	CCCCGCCCCGCCCCCGCCCCCGCC
VVO_S00001	GAAA	AAAG	1522201	1522222	22	1	AAGAAAGGAAAGAAAGAAAGAA
VVO_S00001	GAG	AGG	2569396	2569417	22	1	GAGGAGGAGGAGCAGGAGGAGG
VVO_S00001	AGG	AGG	2569436	2569459	24	1	AGGAGGAGGAGGGGGAGGAGGAGG
VVO_S00001	T	A	3883864	3883888	25	1	tttttttttttttnttttttttttt
VVO_S00001	GTC	ACG	28837	28854	18	0	GTCGTCGTCGTCGTCGTC
VVO_S00001	GATAT	ATATC	50456	50470	15	0	GATATGATATGATAT
VVO_S00001	TTCGAA	AATTCG	51303	51320	18	0	TTCGAATTCGAATTCGAA
VVO_S00001	GTGTG	ACACC	51427	51441	15	0	GTGTGGTGTGGTGTG
VVO_S00001	AGC	AGC	58018	58035	18	0	AGCAGCAGCAGCAGCAGC
VVO_S00001	TACA	ATAC	58733	58751	19	0	TACATACATACATACATAC
VVO_S00001	CTG	AGC	59729	59744	16	0	CTGCTGCTGCTGCTGC
VVO_S00001	AATTG	AATTC	61484	61503	20	0	AATTGAATTGAATTGAATTG
VVO_S00001	A	A	106654	106682	29	0	aaaaaaaaaaaaaaaaaaaaaaaaaaaaa
VVO_S00001	ATGGGG	ATCCCC	120909	120927	19	0	ATGGGGATGGGGATGGGGA
VVO_S00001	ACC	ACC	122313	122328	16	0	ACCACCACCACCACCA
VVO_S00001	CGTTGG	AACGCC	123005	123025	21	0	CGTTGGCGTTGGCGTTGGCGT
VVO_S00001	AATCC	AATCC	146733	146748	16	0	AATCCAATCCAATCCA
VVO_S00001	CCTCT	AGAGG	151798	151812	15	0	CCTCTCCTCTCCTCT
VVO_S00001	T	A	157874	157893	20	0	tttttttttttttttttttt
VVO_S00001	TTCAA	AATTC	204655	204669	15	0	TTCAATTCAATTCAA
VVO_S00001	C	C	214971	214986	16	0	CCCCCCCCCCCCCCCC
VVO_S00001	CGTCT	ACGAG	229169	229189	21	0	CGTCTCGTCTCGTCTCGTCTC
VVO_S00001	CTCGT	ACGAG	235283	235305	23	0	CTCGTCTCGTCTCGTCTCGTCTC
VVO_S00001	TCA	ATC	286688	286710	23	0	TCATCATCATCATCATCATCATC
VVO_S00001	CATCA	ATCAC	287351	287366	16	0	CATCACATCACATCAC
VVO_S00001	ATC	ATC	287523	287538	16	0	ATCATCATCATCATCA
VVO_S00001	ACAAGC	AAGCAC	291268	291294	27	0	ACAAGCACAAGCACAAGCACAAGCACA
VVO_S00001	GTCGAT	ATCGAC	292255	292273	19	0	GTCGATGTCGATGTCGATG
VVO_S00001	CCTCTG	AGAGGC	293685	293703	19	0	CCTCTGCCTCTGCCTCTGC
VVO_S00001	TTTCC	AAAGG	296583	296598	16	0	TTTCCTTTCCTTTCCT
VVO_S00001	GAT	ATC	297638	297659	22	0	GATGATGATGATGATGATGATG
VVO_S00001	GTGCCA	ACTGGC	315798	315817	20	0	GTGCCAGTGCCAGTGCCAGT
VVO_S00001	CGAA	AACG	351408	351428	21	0	CGAACGAACGAACGAACGAAC
VVO_S00001	GGATGA	ATCCTC	352016	352033	18	0	GGATGAGGATGAGGATGA
VVO_S00001	TG	AC	354977	354991	15	0	TGTGTGTGTGTGTGT
VVO_S00001	GCTG	AGCC	397806	397820	15	0	GCTGGCTGGCTGGCT
VVO_S00001	AACAG	AACAG	398077	398097	21	0	AACAGAACAGAACAGAACAGA
VVO_S00001	CCTGCT	AGCAGG	406010	406027	18	0	CCTGCTCCTGCTCCTGCT
VVO_S00001	CGGGGA	ACGGGG	406114	406131	18	0	CGGGGACGGGGACGGGGA
VVO_S00001	GGA	AGG	406594	406608	15	0	GGAGGAGGAGGAGGA
VVO_S00001	AGTGGC	ACTGCC	408189	408208	20	0	AGTGGCAGTGGCAGTGGCAG
VVO_S00001	AGTTGG	AACTCC	419833	419856	24	0	AGTTGGAGTTGGAGTTGGAGTTGG
VVO_S00001	AATCAG	AATCAG	423448	423467	20	0	AATCAGAATCAGAATCAGAA
VVO_S00001	AGACG	ACGAG	423596	423611	16	0	AGACGAGACGAGACGA
VVO_S00001	GAGGGT	ACCCTC	425078	425096	19	0	GAGGGTGAGGGTGAGGGTG
VVO_S00001	CACCCG	ACCCGC	428979	428997	19	0	CACCCGCACCCGCACCCGC
VVO_S00001	TGCTGA	ATCAGC	431928	431959	32	0	TGCTGATGCTGATGCTGATGCTGATGCTGATG
VVO_S00001	GGTTTC	AAACCG	449545	449566	22	0	GGTTTCGGTTTCGGTTTCGGTT
VVO_S00001	GCTCCG	AGCCGG	475477	475498	22	0	GCTCCGGCTCCGGCTCCGGCTC
VVO_S00001	TTATC	AAGAT	481300	481315	16	0	TTATCTTATCTTATCT
VVO_S00001	CGG	CCG	503724	503738	15	0	CGGCGGCGGCGGCGG
VVO_S00001	GCCTCT	AGAGGC	507115	507132	18	0	GCCTCTGCCTCTGCCTCT
VVO_S00001	AGGA	AAGG	510280	510295	16	0	AGGAAGGAAGGAAGGA
VVO_S00001	CTG	AGC	527524	527539	16	0	CTGCTGCTGCTGCTGC
VVO_S00001	ACGAAG	AAGACG	612925	612961	37	0	ACGAAGACGAAGACGAAGACGAAGACGAAGACGAAGA
VVO_S00001	CTCTGC	AGAGGC	628214	628243	30	0	CTCTGCCTCTGCCTCTGCCTCTGCCTCTGC
VVO_S00001	ATTT	AAAT	681739	681753	15	0	ATTTATTTATTTATT
VVO_S00001	GGT	ACC	714538	714553	16	0	GGTGGTGGTGGTGGTG
VVO_S00001	AGATT	AATCT	721651	721666	16	0	AGATTAGATTAGATTA
VVO_S00001	GGAAAA	AAAAGG	724064	724084	21	0	GGAAAAGGAAAAGGAAAAGGA
VVO_S00001	GATAA	AAGAT	725507	725521	15	0	GATAAGATAAGATAA
VVO_S00001	GATTTT	AAAATC	1013738	1013755	18	0	GATTTTGATTTTGATTTT
VVO_S00001	CGACTC	ACTCCG	1051003	1051020	18	0	CGACTCCGACTCCGACTC
VVO_S00001	CCCAAG	AAGCCC	1051343	1051367	25	0	CCCAAGCCCAAGCCCAAGCCCAAGC
VVO_S00001	GAGCGC	AGCGCG	1194056	1194074	19	0	GAGCGCGAGCGCGAGCGCG
VVO_S00001	TTATC	AAGAT	1319602	1319619	18	0	TTATCTTATCTTATCTTA
VVO_S00001	CTTCC	AAGGG	1345005	1345019	15	0	CTTCCCTTCCCTTCC
VVO_S00001	GGCAT	ATGCC	1372124	1372142	19	0	GGCATGGCATGGCATGGCA
VVO_S00001	GACAA	AAGAC	1372144	1372161	18	0	GACAAGACAAGACAAGAC
VVO_S00001	ACAT	ATAC	1378390	1378404	15	0	ACATACATACATACA
VVO_S00001	TCG	ACG	1383019	1383035	17	0	TCGTCGTCGTCGTCGTC
VVO_S00001	AAGGAA	AAAAGG	1449635	1449652	18	0	AAGGAAAAGGAAAAGGAA
VVO_S00001	CGT	ACG	1450152	1450171	20	0	CGTCGTCGTCGTCGTCGTCG
VVO_S00001	TCA	ATC	1469807	1469821	15	0	TCATCATCATCATCA
VVO_S00001	AGGGG	AGGGG	1470080	1470095	16	0	AGGGGAGGGGAGGGGA
VVO_S00001	GGGAG	AGGGG	1488404	1488419	16	0	GGGAGGGGAGGGGAGG
VVO_S00001	TCGTCA	ATCGTC	1489122	1489141	20	0	TCGTCATCGTCATCGTCATC
VVO_S00001	TGCCAG	ACTGGC	1521425	1521445	21	0	TGCCAGTGCCAGTGCCAGTGC
VVO_S00001	ACGCA	AACGC	1521448	1521462	15	0	ACGCAACGCAACGCA
VVO_S00001	AAGA	AAAG	1522428	1522443	16	0	AAGAAAGAAAGAAAGA
VVO_S00001	GCTCT	AGAGC	1528037	1528054	18	0	GCTCTGCTCTGCTCTGCT
VVO_S00001	CAT	ATC	1643540	1643554	15	0	CATCATCATCATCAT
VVO_S00001	TTCTGC	AAGCAG	1666309	1666326	18	0	TTCTGCTTCTGCTTCTGC
VVO_S00001	CGCTT	AAGCG	1689525	1689539	15	0	CGCTTCGCTTCGCTT
VVO_S00001	AGCATC	ATCAGC	1693306	1693323	18	0	AGCATCAGCATCAGCATC
VVO_S00001	GAGAGG	AGAGGG	1695038	1695055	18	0	GAGAGGGAGAGGGAGAGG
VVO_S00001	TCATCG	ATCGTC	1718858	1718875	18	0	TCATCGTCATCGTCATCG
VVO_S00001	T	A	1753378	1753394	17	0	ttttttttttttttttt
VVO_S00001	ACA	AAC	1756551	1756565	15	0	ACAACAACAACAACA
VVO_S00001	GGCAA	AAGGC	1806460	1806477	18	0	GGCAAGGCAAGGCAAGGC
VVO_S00001	GCGAT	ATCGC	1819874	1819888	15	0	GCGATGCGATGCGAT
VVO_S00001	AGCACG	ACGAGC	1857862	1857883	22	0	AGCACGAGCACGAGCACGAGCA
VVO_S00001	CACACG	ACACGC	1859939	1859960	22	0	CACACGCACACGCACACGCACA
VVO_S00001	GAGTGG	ACTCCC	1862563	1862583	21	0	GAGTGGGAGTGGGAGTGGGAG
VVO_S00001	ATAAT	AATAT	1866818	1866832	15	0	ATAATATAATATAAT
VVO_S00001	GGGT	ACCC	1868657	1868672	16	0	GGGTGGGTGGGTGGGT
VVO_S00001	ATCC	ATCC	1882588	1882606	19	0	ATCCATCCATCCATCCATC
VVO_S00001	GTG	ACC	1906218	1906237	20	0	GTGGTGGTGGTGGTGGTGGT
VVO_S00001	GTCGCA	ACTGCG	1906440	1906463	24	0	GTCGCAGTCGCAGTCGCAGTCGCA
VVO_S00001	TGAATC	AATCTG	1913871	1913888	18	0	TGAATCTGAATCTGAATC
VVO_S00001	TCTGAG	ACTCAG	1913980	1913999	20	0	TCTGAGTCTGAGTCTGAGTC
VVO_S00001	TTCAGA	AATCTG	1914318	1914335	18	0	TTCAGATTCAGATTCAGA
VVO_S00001	ATCCA	AATCC	1936457	1936471	15	0	ATCCAATCCAATCCA
VVO_S00001	ATGGAC	ATGTCC	1947031	1947048	18	0	ATGGACATGGACATGGAC
VVO_S00001	GCACAT	ATGTGC	2027224	2027243	20	0	GCACATGCACATGCACATGC
VVO_S00001	GGT	ACC	2046630	2046648	19	0	GGTGGTGGTGGTGGTGGTG
VVO_S00001	AGC	AGC	2047450	2047465	16	0	AGCAGCAGCAGCAGCA
VVO_S00001	TCGACG	ACGTCG	2051483	2051501	19	0	TCGACGTCGACGTCGACGT
VVO_S00001	CCCT	AGGG	2051672	2051686	15	0	CCCTCCCTCCCTCCC
VVO_S00001	GCA	AGC	2164703	2164717	15	0	GCAGCAGCAGCAGCA
VVO_S00001	GGAGAA	AAGGAG	2179285	2179303	19	0	GGAGAAGGAGAAGGAGAAG
VVO_S00001	CGGTCC	ACCGGG	2199017	2199035	19	0	CGGTCCCGGTCCCGGTCCC
VVO_S00001	CTTTTC	AAAAGG	2215862	2215883	22	0	CTTTTCCTTTTCCTTTTCCTTT
VVO_S00001	CTCATC	ATCCTC	2227697	2227714	18	0	CTCATCCTCATCCTCATC
VVO_S00001	AG	AG	2252207	2252221	15	0	AGAGAGAGAGAGAGA
VVO_S00001	CCTCCA	ACCTCC	2271670	2271687	18	0	CCTCCACCTCCACCTCCA
VVO_S00001	TCCGAT	AATCGG	2291061	2291081	21	0	TCCGATTCCGATTCCGATTCC
VVO_S00001	CCGAGA	ACCGAG	2319529	2319549	21	0	CCGAGACCGAGACCGAGACCG
VVO_S00001	GGATT	AATCC	2375631	2375645	15	0	GGATTGGATTGGATT
VVO_S00001	CCAGC	AGCCC	2375884	2375898	15	0	CCAGCCCAGCCCAGC
VVO_S00001	CCCACC	ACCCCC	2411626	2411646	21	0	CCCACCCCCACCCCCACCCCC
VVO_S00001	GTT	AAC	2421826	2421842	17	0	GTTGTTGTTGTTGTTGT
VVO_S00001	GTT	AAC	2488335	2488353	19	0	GTTGTTGTTGTTGTTGTTG
VVO_S00001	AGC	AGC	2504409	2504424	16	0	AGCAGCAGCAGCAGCA
VVO_S00001	CAGG	AGGC	2512310	2512324	15	0	CAGGCAGGCAGGCAG
VVO_S00001	AAGCCA	AAAGCC	2534029	2534046	18	0	AAGCCAAAGCCAAAGCCA
VVO_S00001	CTG	AGC	2687794	2687816	23	0	CTGCTGCTGCTGCTGCTGCTGCT
VVO_S00001	TGGTGA	ATCACC	2710891	2710908	18	0	TGGTGATGGTGATGGTGA
VVO_S00001	GAA	AAG	2730957	2730971	15	0	GAAGAAGAAGAAGAA
VVO_S00001	TTTTTC	AAAAAG	2807515	2807533	19	0	TTTTTCTTTTTCTTTTTCT
VVO_S00001	GGA	AGG	2830421	2830436	16	0	GGAGGAGGAGGAGGAG
VVO_S00001	CAC	ACC	2895889	2895904	16	0	CACCACCACCACCACC
VVO_S00001	AGATT	AATCT	2907546	2907561	16	0	AGATTAGATTAGATTA
VVO_S00001	ACG	ACG	2926623	2926638	16	0	ACGACGACGACGACGA
VVO_S00001	ATCCAA	AAATCC	2942770	2942788	19	0	ATCCAAATCCAAATCCAAA
VVO_S00001	GATGCT	ATCAGC	2968542	2968559	18	0	GATGCTGATGCTGATGCT
VVO_S00001	GGC	CCG	3067822	3067839	18	0	GGCGGCGGCGGCGGCGGC
VVO_S00001	T	A	3079765	3079781	17	0	ttttttttttttttttt
VVO_S00001	GGGATG	ATCCCC	3128067	3128084	18	0	GGGATGGGGATGGGGATG
VVO_S00001	TGA	ATC	3233152	3233183	32	0	TGATGATGATGATGATGATGATGATGATGATG
VVO_S00001	GAGGG	AGGGG	3236901	3236915	15	0	GAGGGGAGGGGAGGG
VVO_S00001	GGT	ACC	3236923	3236940	18	0	GGTGGTGGTGGTGGTGGT
VVO_S00001	CCATTC	AATGGG	3243687	3243707	21	0	CCATTCCCATTCCCATTCCCA
VVO_S00001	CATCAC	ATCACC	3247015	3247038	24	0	CATCACCATCACCATCACCATCAC
VVO_S00001	CCTCT	AGAGG	3257950	3257965	16	0	CCTCTCCTCTCCTCTC
VVO_S00001	CCA	ACC	3376407	3376436	30	0	CCACCACCACCACCACCACCACCACCACCA
VVO_S00001	GCT	AGC	3376642	3376657	16	0	GCTGCTGCTGCTGCTG
VVO_S00001	CCTCT	AGAGG	3405365	3405379	15	0	CCTCTCCTCTCCTCT
VVO_S00001	TGTTGC	AACAGC	3421017	3421034	18	0	TGTTGCTGTTGCTGTTGC
VVO_S00001	TCTT	AAAG	3429004	3429018	15	0	TCTTTCTTTCTTTCT
VVO_S00001	T	A	3464823	3464842	20	0	tttttttttttttttttttt
VVO_S00001	TTAT	AAAT	3468740	3468757	18	0	TTATTTATTTATTTATTT
VVO_S00001	AGATT	AATCT	3468811	3468826	16	0	AGATTAGATTAGATTA
VVO_S00001	GTG	ACC	3470496	3470510	15	0	GTGGTGGTGGTGGTG
VVO_S00001	TAATC	AATCT	3472347	3472362	16	0	TAATCTAATCTAATCT
VVO_S00001	CTG	AGC	3496286	3496301	16	0	CTGCTGCTGCTGCTGC
VVO_S00001	TCA	ATC	3582139	3582155	17	0	TCATCATCATCATCATC
VVO_S00001	CATCT	ATCTC	3605758	3605774	17	0	CATCTCATCTCATCTCA
VVO_S00001	TAG	ACT	3662116	3662130	15	0	TAGTAGTAGTAGTAG
VVO_S00001	CCTTTG	AAAGGC	3687367	3687388	22	0	CCTTTGCCTTTGCCTTTGCCTT
VVO_S00001	GTGAC	ACGTC	3698710	3698724	15	0	GTGACGTGACGTGAC
VVO_S00001	TCCTTG	AAGGAC	3736568	3736591	24	0	TCCTTGTCCTTGTCCTTGTCCTTG
VVO_S00001	CTTTCT	AAAGAG	3741157	3741180	24	0	CTTTCTCTTTCTCTTTCTCTTTCT
VVO_S00001	AAGGC	AAGGC	3741654	3741672	19	0	AAGGCAAGGCAAGGCAAGG
VVO_S00001	GGT	ACC	3742301	3742316	16	0	GGTGGTGGTGGTGGTG
VVO_S00001	TGATTT	AAAATC	3747796	3747814	19	0	TGATTTTGATTTTGATTTT
VVO_S00001	TTGGAT	AAATCC	3782456	3782473	18	0	TTGGATTTGGATTTGGAT
VVO_S00001	CATG	ATGC	3801291	3801308	18	0	CATGCATGCATGCATGCA
VVO_S00001	TGCC	AGGC	3819500	3819524	25	0	TGCCTGCCTGCCTGCCTGCCTGCCT
VVO_S00001	G	C	3825111	3825126	16	0	gggggggggggggggg
VVO_S00001	GGAGA	AGAGG	3854649	3854663	15	0	GGAGAGGAGAGGAGA
VVO_S00001	CTCTTC	AAGAGG	3862903	3862926	24	0	CTCTTCCTCTTCCTCTTCCTCTTC
VVO_S00001	GGAGTT	AACTCC	3872375	3872396	22	0	GGAGTTGGAGTTGGAGTTGGAG
VVO_S00001	ATGAGC	ATGAGC	3872398	3872418	21	0	ATGAGCATGAGCATGAGCATG
VVO_S00001	AGATA	AAGAT	3885283	3885298	16	0	AGATAAGATAAGATAA
VVO_S00001	TCGCG	ACGCG	3887125	3887141	17	0	TCGCGTCGCGTCGCGTC
VVO_S00001	CCACG	ACGCC	3887969	3887984	16	0	CCACGCCACGCCACGC
VVO_S00001	ATGGCT	ATAGCC	3894102	3894121	20	0	ATGGCTATGGCTATGGCTAT
VVO_S00001	TTCGT	AAACG	3895812	3895829	18	0	TTCGTTTCGTTTCGTTTC
VVO_S00001	CGA	ACG	3913308	3913322	15	0	CGACGACGACGACGA
VVO_S00001	AGATT	AATCT	3917377	3917391	15	0	AGATTAGATTAGATT
VVO_S00002	TCCCTC	AGAGGG	879788	879833	46	3	TCCCTCTCCCTCTCCCTCTCTCGTTCCCTCTCCCTCTCCCTCTCCC
VVO_S00002	GAG	AGG	92994	93022	29	2	GAGGAGGAGGAAGAGGAGGAAGAGGAGGA
VVO_S00002	TCTCTT	AAAGAG	877991	878021	31	2	TCTCTTTCTCTTTCTCTTCCTTTTCTCTTTC
VVO_S00002	GTAGT	ACACT	2144358	2144399	42	2	GTAGTGTAGTGTAGTAGTGTAGTGTAGTGTAGTGTAGTGTAG
VVO_S00002	CTG	AGC	490355	490376	22	1	CTGCTTCTGCTGCTGCTGCTGC
VVO_S00002	CCACCG	ACCGCC	802332	802357	26	1	CCACCACCACCGCCACCGCCACCGCC
VVO_S00002	TTTCC	AAAGG	877463	877483	21	1	TTTCCTTTCCTTTCCGTTTCC
VVO_S00002	TAGG	ACCT	1010963	1010983	21	1	GGTAGATAGGTAGGTAGGTAG
VVO_S00002	ACGGTC	ACCGTG	1035366	1035389	24	1	ACGGTCACGGTCACGGTCGCGGTC
VVO_S00002	GATGAA	AAGATG	1036852	1036883	32	1	GATGAAGATGAAGATGAAGATGAAGACGAAGA
VVO_S00002	CGT	ACG	1178357	1178378	22	1	TCGTCGCCGTCGTCGTCGTCGT
VVO_S00002	CGTTCA	AACGTG	1246127	1246152	26	1	CGTTCACGTTCACGTTCACATTCACG
VVO_S00002	CTT	AAG	1317265	1317286	22	1	CTTCTGCTTCTTCTTCTTCTTC
VVO_S00002	TCATC	ATCTC	1336767	1336793	27	1	TCATCTCATCTCATCTCATTCTCATCT
VVO_S00002	TCTT	AAAG	1477487	1477506	20	1	TCTTTCTTTCTTCTTTCTTT
VVO_S00002	ACG	ACG	1849259	1849279	21	1	ACGACGACAACGACGACGACG
VVO_S00002	TTCT	AAAG	2160893	2160913	21	1	TTTCTCTTCTTTCTTTCTTTC
VVO_S00002	GCA	AGC	2195253	2195273	21	1	GCAGCAGCAGAAGCAGCAGCA
VVO_S00002	CCA	ACC	2396063	2396085	23	1	CCACCACCACCCCCACCACCACC
VVO_S00002	GGCGAT	ATCGCC	18431	18449	19	0	GGCGATGGCGATGGCGATG
VVO_S00002	AGAGCA	AAGAGC	29350	29367	18	0	AGAGCAAGAGCAAGAGCA
VVO_S00002	TAGC	AGCT	31141	31159	19	0	TAGCTAGCTAGCTAGCTAG
VVO_S00002	GAA	AAG	37618	37632	15	0	GAAGAAGAAGAAGAA
VVO_S00002	CAACTG	AACTGC	116697	116721	25	0	CAACTGCAACTGCAACTGCAACTGC
VVO_S00002	GATAA	AAGAT	143178	143192	15	0	GATAAGATAAGATAA
VVO_S00002	CGT	ACG	156095	156110	16	0	CGTCGTCGTCGTCGTC
VVO_S00002	TCACT	AAGTG	157040	157054	15	0	TCACTTCACTTCACT
VVO_S00002	GGCTCT	AGAGCC	240392	240417	26	0	GGCTCTGGCTCTGGCTCTGGCTCTGG
VVO_S00002	CATT	AATG	289148	289162	15	0	CATTCATTCATTCAT
VVO_S00002	CCAC	ACCC	325020	325037	18	0	CCACCCACCCACCCACCC
VVO_S00002	GCCCTC	AGGGCG	343207	343224	18	0	GCCCTCGCCCTCGCCCTC
VVO_S00002	TCCGAG	ACTCGG	348331	348362	32	0	TCCGAGTCCGAGTCCGAGTCCGAGTCCGAGTC
VVO_S00002	GATGAA	AAGATG	462450	462467	18	0	GATGAAGATGAAGATGAA
VVO_S00002	AATGCA	AAATGC	517659	517676	18	0	AATGCAAATGCAAATGCA
VVO_S00002	CTCTCC	AGAGGG	570603	570623	21	0	CTCTCCCTCTCCCTCTCCCTC
VVO_S00002	TCGTCA	ATCGTC	651872	651891	20	0	TCGTCATCGTCATCGTCATC
VVO_S00002	TCTGAT	AATCAG	728072	728089	18	0	TCTGATTCTGATTCTGAT
VVO_S00002	CCCTC	AGGGG	788506	788520	15	0	CCCTCCCCTCCCCTC
VVO_S00002	TCCTGT	AACAGG	816557	816578	22	0	TCCTGTTCCTGTTCCTGTTCCT
VVO_S00002	TCCCGC	AGCGGG	878972	878991	20	0	TCCCGCTCCCGCTCCCGCTC
VVO_S00002	TCTCTA	ATAGAG	879161	879180	20	0	TCTCTATCTCTATCTCTATC
VVO_S00002	TTCACG	AACGTG	879679	879696	18	0	TTCACGTTCACGTTCACG
VVO_S00002	CCACGT	ACGTCC	881658	881678	21	0	CCACGTCCACGTCCACGTCCA
VVO_S00002	GACAA	AAGAC	882917	882931	15	0	GACAAGACAAGACAA
VVO_S00002	CCCTCC	AGGGGG	883399	883416	18	0	CCCTCCCCCTCCCCCTCC
VVO_S00002	TGTCC	ACAGG	928286	928308	23	0	TGTCCTGTCCTGTCCTGTCCTGT
VVO_S00002	AGCTC	AGCTC	969158	969176	19	0	AGCTCAGCTCAGCTCAGCT
VVO_S00002	TTTCG	AAACG	1022123	1022137	15	0	TTTCGTTTCGTTTCG
VVO_S00002	TGGTGC	ACCAGC	1041641	1041663	23	0	TGGTGCTGGTGCTGGTGCTGGTG
VVO_S00002	ATC	ATC	1069653	1069667	15	0	ATCATCATCATCATC
VVO_S00002	GCA	AGC	1128196	1128215	20	0	GCAGCAGCAGCAGCAGCAGC
VVO_S00002	AAGGAC	AAGGAC	1128353	1128374	22	0	AAGGACAAGGACAAGGACAAGG
VVO_S00002	ACAAG	AAGAC	1162579	1162594	16	0	ACAAGACAAGACAAGA
VVO_S00002	CGA	ACG	1172255	1172269	15	0	CGACGACGACGACGA
VVO_S00002	AGC	AGC	1173098	1173112	15	0	AGCAGCAGCAGCAGC
VVO_S00002	GGT	ACC	1173315	1173329	15	0	GGTGGTGGTGGTGGT
VVO_S00002	GCT	AGC	1173778	1173793	16	0	GCTGCTGCTGCTGCTG
VVO_S00002	GCTA	AGCT	1177460	1177474	15	0	GCTAGCTAGCTAGCT
VVO_S00002	TCG	ACG	1180892	1180909	18	0	TCGTCGTCGTCGTCGTCG
VVO_S00002	TTCCCA	AATGGG	1188160	1188183	24	0	TTCCCATTCCCATTCCCATTCCCA
VVO_S00002	TCCC	AGGG	1194668	1194690	23	0	TCCCTCCCTCCCTCCCTCCCTCC
VVO_S00002	TCATCC	ATCCTC	1204191	1204211	21	0	TCATCCTCATCCTCATCCTCA
VVO_S00002	TCAACA	AACATC	1211036	1211053	18	0	TCAACATCAACATCAACA
VVO_S00002	AGGGGG	AGGGGG	1239793	1239810	18	0	AGGGGGAGGGGGAGGGGG
VVO_S00002	AGAGGG	AGAGGG	1260906	1260924	19	0	AGAGGGAGAGGGAGAGGGA
VVO_S00002	A	A	1281474	1281496	23	0	aaaaaaaaaaaaaaaaaaaaaaa
VVO_S00002	CCAAT	AATCC	1291002	1291018	17	0	CCAATCCAATCCAATCC
VVO_S00002	GGGAAT	AATGGG	1292409	1292431	23	0	GGGAATGGGAATGGGAATGGGAA
VVO_S00002	TGTGGA	ATCCAC	1292960	1292977	18	0	TGTGGATGTGGATGTGGA
VVO_S00002	ATACGA	AATACG	1293427	1293444	18	0	ATACGAATACGAATACGA
VVO_S00002	TTCCC	AAGGG	1293579	1293598	20	0	TTCCCTTCCCTTCCCTTCCC
VVO_S00002	GGTTTC	AAACCG	1296956	1296975	20	0	GGTTTCGGTTTCGGTTTCGG
VVO_S00002	CGTGTG	ACACGC	1299385	1299414	30	0	CGTGTGCGTGTGCGTGTGCGTGTGCGTGTG
VVO_S00002	ACGACT	ACTACG	1321418	1321437	20	0	ACGACTACGACTACGACTAC
VVO_S00002	GGCAGA	AGAGGC	1323787	1323805	19	0	GGCAGAGGCAGAGGCAGAG
VVO_S00002	CTGCGA	ACTGCG	1323925	1323945	21	0	CTGCGACTGCGACTGCGACTG
VVO_S00002	ACGAGC	ACGAGC	1324093	1324110	18	0	ACGAGCACGAGCACGAGC
VVO_S00002	CACCC	ACCCC	1335515	1335532	18	0	CACCCCACCCCACCCCAC
VVO_S00002	CGAAT	AATCG	1355174	1355194	21	0	CGAATCGAATCGAATCGAATC
VVO_S00002	CAAGCA	AAGCAC	1403212	1403240	29	0	CAAGCACAAGCACAAGCACAAGCACAAGC
VVO_S00002	TTTTC	AAAAG	1474945	1474961	17	0	TTTtCTTTtCTTTtCTT
VVO_S00002	ACC	ACC	1584211	1584225	15	0	ACCACCACCACCACC
VVO_S00002	GTGAC	ACGTC	1600532	1600552	21	0	GTGACGTGACGTGACGTGACG
VVO_S00002	TCCTCG	ACGAGG	1701485	1701505	21	0	TCCTCGTCCTCGTCCTCGTCC
VVO_S00002	AGTAGC	ACTGCT	1718188	1718206	19	0	AGTAGCAGTAGCAGTAGCA
VVO_S00002	GTCCTT	AAGGAC	1736474	1736497	24	0	GTCCTTGTCCTTGTCCTTGTCCTT
VVO_S00002	TCA	ATC	1752438	1752452	15	0	TCATCATCATCATCA
VVO_S00002	CCGGCA	ACCGGC	1896826	1896845	20	0	CCGGCACCGGCACCGGCACC
VVO_S00002	TTC	AAG	1901177	1901195	19	0	TTCTTCTTCTTCTTCTTCT
VVO_S00002	TGCAT	AATGC	1983293	1983307	15	0	TGCATTGCATTGCAT
VVO_S00002	GCA	AGC	2024549	2024567	19	0	GCAGCAGCAGCAGCAGCAG
VVO_S00002	GAC	ACG	2051415	2051432	18	0	GACGACGACGACGACGAC
VVO_S00002	TGTCTC	ACAGAG	2144467	2144484	18	0	TGTCTCTGTCTCTGTCTC
VVO_S00002	CT	AG	2144738	2144759	22	0	CTCTCTCTCTCTCTCTCTCTCT
VVO_S00002	TCG	ACG	2260386	2260402	17	0	TCGTCGTCGTCGTCGTC
VVO_S00002	T	A	2405206	2405229	24	0	tttttttttttttttttttttttt
VVO_S00002	TGAGAT	AATCTC	2423725	2423744	20	0	TGAGATTGAGATTGAGATTG
VVO_S00002	TCCTGC	AGCAGG	2445430	2445447	18	0	TCCTGCTCCTGCTCCTGC
VVO_S00002	TAATC	AATCT	2548597	2548612	16	0	TAATCTAATCTAATCT
VVO_S00002	AAAATA	AAAAAT	2549073	2549104	32	0	AAAATAAAAATAAAAATAAAAATAAAAATAAA
VVO_S00002	GGT	ACC	2567369	2567384	16	0	GGTGGTGGTGGTGGTG
VVO_S00002	TCAAA	AAATC	2574183	2574197	15	0	TCAAATCAAATCAAA
VVO_S00003	CTT	AAG	1034365	1034409	45	4	CTTCTTCTTCTTCTTCTTCTTGTCCTTCTTCTTGTCCTTCTTCTT
VVO_S00003	CTT	AAG	1034494	1034534	41	4	CTTCTTCTCCTTCTTCTCCTCCTTCTTCTTCTCCTTCTTCT
VVO_S00003	CCT	AGG	131152	131189	38	3	CCTCCTCCTCCTCCTCCTCCACCACCTCCACCTCCTCC
VVO_S00003	GATGAC	ATCGTC	732368	732402	35	3	GATGACGATGACGATGACGACGATGACGATGACGA
VVO_S00003	CTC	AGG	1479598	1479630	33	3	CTCCTCCTCCTCCTCTGCTCCTCCTCCGTCCTC
VVO_S00003	TCCTCA	ATCCTC	1870544	1870581	38	3	TCCTCATCCTCATCCTCCTCATCCTCATCCTCATCCTC
VVO_S00003	GAACCA	AACCAG	1958009	1958051	43	3	GAACCAGAACCAGAACCAGAATCAGAATCAGAACCAGCACCAG
VVO_S00003	ACC	ACC	236398	236425	28	2	ACCACAACCACCACCACCACTACCACCA
VVO_S00003	TGG	ACC	2232367	2232396	30	2	TGGTGATGGTGGTGGTGATGGTGGTGGTGG
VVO_S00003	GTC	ACG	148288	148310	23	1	GTCGTCGTCGTCGTCGTAGTCGT
VVO_S00003	ATT	AAT	892559	892579	21	1	ATTATTATTATTATTGATTAT
VVO_S00003	TTCCTC	AAGAGG	1033705	1033734	30	1	TTCCTCTTCCTCTTCCTCTTCCTCCTCCTC
VVO_S00003	CT	AG	1053955	1053975	21	1	CTCTCTCTCTTCTCTCTCTCT
VVO_S00003	GAG	AGG	1135265	1135303	39	1	GAGGAGGAGGAGGAGGAGGAGGAGgAGGAGGAGGAGGAG
VVO_S00003	AAT	AAT	1183479	1183514	36	1	AATAATAATAATAATAATAATAATAATAACAATAAT
VVO_S00003	TGA	ATC	1193174	1193199	26	1	TGATGATGAAGATGATGATGATGATG
VVO_S00003	GTCTCT	ACAGAG	1257347	1257379	33	1	GTCTCTGTCTCTGTCTCTGTCTCTATCTCTGTC
VVO_S00003	TCCTTG	AAGGAC	1473134	1473167	34	1	CTTGTCCTTGTCCTTTTCCTTGTCCTTGTCCTTG
VVO_S00003	TCTGTC	ACAGAG	1630474	1630506	33	1	TCTGTCTCTGTCTCTGTCTCTGTCTCCGTCTCT
VVO_S00003	AAAG	AAAG	1741511	1741532	22	1	GAAAGAAAAGAAAGAAAGAAAG
VVO_S00003	TCGG	ACCG	2028458	2028480	23	1	TCGGTCGGTCGGTCGGTGGTCGG
VVO_S00003	TAAA	AAAT	2074838	2074864	27	1	TAAATAAATAAATAAGTAAATAAATAA
VVO_S00003	GAG	AGG	2103717	2103739	23	1	GAGGAGGAGGAGGAAGAGGAGGA
VVO_S00003	TCG	ACG	2156501	2156528	28	1	TCGTCGTCGTCGTCGTCGTCTTCGTCGT
VVO_S00003	TCG	ACG	2227233	2227255	23	1	TCGTCGTCGTCGTCGTCATCGTC
VVO_S00003	CAG	AGC	2227383	2227403	21	1	CAGCAGCAGCAGGAGCAGCAG
VVO_S00003	CAC	ACC	2842	2858	17	0	CACCACCACCACCACCA
VVO_S00003	T	A	171868	171884	17	0	ttttttttttttttttt
VVO_S00003	TCTTCG	AAGACG	195976	195995	20	0	TCTTCGTCTTCGTCTTCGTC
VVO_S00003	GTGCGT	ACACGC	197915	197932	18	0	GTGCGTGTGCGTGTGCGT
VVO_S00003	CCAC	ACCC	232666	232680	15	0	CCACCCACCCACCCA
VVO_S00003	TCTCT	AAGAG	279500	279514	15	0	TCTCTTCTCTTCTCT
VVO_S00003	GGGAGA	AGAGGG	299041	299060	20	0	GGGAGAGGGAGAGGGAGAGG
VVO_S00003	TGGGG	ACCCC	316055	316071	17	0	TGGGGTGGGGTGGGGTG
VVO_S00003	TATGGG	ATACCC	354500	354517	18	0	TATGGGTATGGGTATGGG
VVO_S00003	AGCCTG	AGCCTG	359900	359917	18	0	AGCCTGAGCCTGAGCCTG
VVO_S00003	TTA	AAT	466042	466056	15	0	TTATTATTATTATTA
VVO_S00003	GAATGC	AATGCG	498067	498085	19	0	GAATGCGAATGCGAATGCG
VVO_S00003	TCCA	ATCC	498380	498394	15	0	TCCATCCATCCATCC
VVO_S00003	CTTGTC	AAGGAC	498798	498817	20	0	CTTGTCCTTGTCCTTGTCCT
VVO_S00003	CGATGA	ATCGTC	499420	499439	20	0	CGATGACGATGACGATGACG
VVO_S00003	AAAGC	AAAGC	511769	511784	16	0	AAAGCAAAGCAAAGCA
VVO_S00003	GAAGA	AAGAG	555664	555680	17	0	GAAGAGAAGAGAAGAGA
VVO_S00003	TGTCA	ATGAC	576998	577012	15	0	TGTCATGTCATGTCA
VVO_S00003	TGCCAT	AATGGC	583748	583766	19	0	TGCCATTGCCATTGCCATT
VVO_S00003	AGATT	AATCT	614583	614598	16	0	AGATTAGATTAGATTA
VVO_S00003	GTTGGA	AACTCC	652531	652548	18	0	GTTGGAGTTGGAGTTGGA
VVO_S00003	GCTTCA	AAGCTG	708105	708122	18	0	GCTTCAGCTTCAGCTTCA
VVO_S00003	GGT	ACC	769633	769647	15	0	GGTGGTGGTGGTGGT
VVO_S00003	GAA	AAG	773070	773084	15	0	GAAGAAGAAGAAGAA
VVO_S00003	GATGCA	ATCTGC	796426	796447	22	0	GATGCAGATGCAGATGCAGATG
VVO_S00003	TGGGAA	AATGGG	796452	796472	21	0	TGGGAATGGGAATGGGAATGG
VVO_S00003	CTCCT	AGAGG	865729	865749	21	0	CTCCTCTCCTCTCCTCTCCTC
VVO_S00003	GATTG	AATCC	890067	890083	17	0	GATTGGATTGGATTGGA
VVO_S00003	GAGGG	AGGGG	930165	930184	20	0	GAGGGGAGGGGAGGGGAGGG
VVO_S00003	GACGAG	ACGAGG	1033799	1033816	18	0	GACGAGGACGAGGACGAG
VVO_S00003	TCGCAA	AATCGC	1099601	1099622	22	0	TCGCAATCGCAATCGCAATCGC
VVO_S00003	AAACCT	AAACCT	1170875	1170893	19	0	AAACCTAAACCTAAACCTA
VVO_S00003	ACA	AAC	1237667	1237681	15	0	ACAACAACAACAACA
VVO_S00003	GAGGAA	AAGAGG	1316769	1316788	20	0	GAGGAAGAGGAAGAGGAAGA
VVO_S00003	CGCCT	AGGCG	1333520	1333534	15	0	CGCCTCGCCTCGCCT
VVO_S00003	ATGCAA	AAATGC	1370625	1370643	19	0	ATGCAAATGCAAATGCAAA
VVO_S00003	CCA	ACC	1370995	1371011	17	0	CCACCACCACCACCACC
VVO_S00003	GAGAAG	AAGGAG	1455188	1455207	20	0	GAGAAGGAGAAGGAGAAGGA
VVO_S00003	GCGAT	ATCGC	1478720	1478735	16	0	GCGATGCGATGCGATG
VVO_S00003	A	A	1530941	1530960	20	0	aaaaaaaaaaaaaaaaaaaa
VVO_S00003	CT	AG	1594271	1594289	19	0	CTCTCTCTCTCTCTCTCTC
VVO_S00003	TCTGTC	ACAGAG	1662501	1662527	27	0	TCTGTCTCTGTCTCTGTCTCTGTCTCT
VVO_S00003	TCTCTT	AAAGAG	1662604	1662631	28	0	TCTCTTTCTCTTTCTCTTTCTCTTTCTC
VVO_S00003	TCCGAC	ACTCCG	1725806	1725825	20	0	TCCGACTCCGACTCCGACTC
VVO_S00003	A	A	1783453	1783467	15	0	AAAAAAAAAAAAAAA
VVO_S00003	CCACGA	ACCACG	1790843	1790865	23	0	CCACGACCACGACCACGACCACG
VVO_S00003	AAGTGA	AAAGTG	1801489	1801506	18	0	AAGTGAAAGTGAAAGTGA
VVO_S00003	A	A	1813666	1813682	17	0	aaaaaaaaaaaaaaaaa
VVO_S00003	AAGGAC	AAGGAC	1846823	1846880	58	0	AAGGACAAGGACAAGGACAAGGACAAGGACAAGGACAAGGACAAGGACAAGGACAAGG
VVO_S00003	CAGCCG	AGCCGC	1858517	1858535	19	0	CAGCCGCAGCCGCAGCCGC
VVO_S00003	CTCTT	AAGAG	1883830	1883844	15	0	CTCTTCTCTTCTCTT
VVO_S00003	AGGAGA	AAGGAG	1885675	1885692	18	0	AGGAGAAGGAGAAGGAGA
VVO_S00003	GAGGAC	ACGAGG	1970302	1970322	21	0	GAGGACGAGGACGAGGACGAG
VVO_S00003	ACAG	ACAG	1980606	1980632	27	0	ACAGACAGACAGACAGACAGACAGACA
VVO_S00003	TCTCTT	AAAGAG	1981148	1981165	18	0	TCTCTTTCTCTTTCTCTT
VVO_S00003	CAC	ACC	2063370	2063389	20	0	CACCACCACCACCACCACCA
VVO_S00003	CAG	AGC	2105731	2105747	17	0	CAGCAGCAGCAGCAGCA
VVO_S00003	CCTG	AGGC	2106271	2106288	18	0	CCTGCCTGCCTGCCTGCC
VVO_S00003	GGTCCT	ACCAGG	2106336	2106353	18	0	GGTCCTGGTCCTGGTCCT
VVO_S00003	A	A	2119039	2119056	18	0	aaaaaaaaaaaaaaaaaa
VVO_S00003	GCGGCT	AGCCGC	2165236	2165255	20	0	GCGGCTGCGGCTGCGGCTGC
VVO_S00003	GGCATG	ATGCCC	2165275	2165298	24	0	GGCATGGGCATGGGCATGGGCATG
VVO_S00003	CTTCT	AAGAG	2192157	2192171	15	0	CTTCTCTTCTCTTCT
VVO_S00003	CCCGCA	ACCCGC	2195109	2195128	20	0	CCCGCACCCGCACCCGCACC
VVO_S00003	CCCACT	ACTCCC	2207585	2207604	20	0	CCCACTCCCACTCCCACTCC
VVO_S00003	AGTGCG	ACTCGC	2211579	2211601	23	0	AGTGCGAGTGCGAGTGCGAGTGC
VVO_S00003	GCC	CCG	2226684	2226699	16	0	GCCGCCGCCGCCGCCG
VVO_S00003	GTGGAA	AAGTGG	2228934	2228953	20	0	GTGGAAGTGGAAGTGGAAGT
VVO_S00003	GACAAC	AACGAC	2299126	2299144	19	0	GACAACGACAACGACAACG
VVO_S00003	TGAACG	AACGTG	2300045	2300062	18	0	TGAACGTGAACGTGAACG
VVO_S00003	TAATC	AATCT	2313399	2313414	16	0	TAATCTAATCTAATCT
VVO_S00003	AAAAGA	AAAAAG	2313454	2313479	26	0	AAAAGAAAAAGAAAAAGAAAAAGAAA
VVO_S00003	CGT	ACG	2330834	2330849	16	0	CGTCGTCGTCGTCGTC
VVO_S00003	TCC	AGG	2342042	2342059	18	0	TCCTCCTCCTCCTCCTCC
VVO_S00003	CAG	AGC	2342064	2342081	18	0	CAGCAGCAGCAGCAGCAG
VVO_S00003	TTTCA	AAATG	2365678	2365693	16	0	TTTCATTTCATTTCAT
VVO_S00003	GCAG	AGGC	2365861	2365877	17	0	GCAGGCAGGCAGGCAGG
VVO_S00003	GTC	ACG	2393769	2393791	23	0	GTCGTCGTCGTCGTCGTCGTCGT
VVO_S00003	CTTTT	AAAAG	2414901	2414916	16	0	CTTTTCTTTTCTTTTC
VVO_S00004	AGCCTG	AGCCTG	358737	358776	40	3	GAGCCTGAACCCGAGCCTCAGCCTGAGCCTGAGCCTGAGC
VVO_S00004	CTTTC	AAAGG	585845	585873	29	2	CTTTCCTTTCCTTTCCTTCCTTTTCTTTC
VVO_S00004	CAG	AGC	1883760	1883786	27	2	CAGCAGCAGCAGCAACAGCAACAGCAG
VVO_S00004	ATTG	AATC	1949294	1949327	34	2	ATTGATTGATTGACTGATTGATTGATCTGATTGA
VVO_S00004	AAAATA	AAAAAT	176947	176972	26	1	AAAAATAAAATAAAAATAAAAATAAA
VVO_S00004	CCT	AGG	381002	381023	22	1	CCTCCTCCTCCTcCTCCTCCTC
VVO_S00004	TTTTC	AAAAG	716180	716208	29	1	CTTTTCTTTTTCTTTTCTTTTCTTTTCTT
VVO_S00004	AGGGGC	AGGGGC	771279	771306	28	1	AGGGGCAGGGGCAGGGGCAGGGACAGGG
VVO_S00004	ATTC	AATG	980594	980614	21	1	ATTCATTCATTCATCTCATTC
VVO_S00004	AAAAGA	AAAAAG	1093276	1093303	28	1	AAAAGGAAAAGAAAAAGAAAAAGAAAAA
VVO_S00004	CTG	AGC	1602503	1602531	29	1	CTGCTTCTGCTGCTGCTGCTGCTGCTGCT
VVO_S00004	A	A	1688293	1688314	22	1	AAAAAAAAAaAAAAAAAAAAAA
VVO_S00004	CCA	ACC	1692559	1692578	20	1	CCACCACCACCACCCCACCA
VVO_S00004	CGACCA	ACCACG	2262696	2262729	34	1	CGACCACGACCACGACCACGACCACGACACGACC
VVO_S00004	GGTGCA	ACCTGC	125697	125724	28	0	GGTGCAGGTGCAGGTGCAGGTGCAGGTG
VVO_S00004	GCTGGT	ACCAGC	125910	125927	18	0	GCTGGTGCTGGTGCTGGT
VVO_S00004	TCTCCT	AAGGAG	130253	130270	18	0	TCTCCTTCTCCTTCTCCT
VVO_S00004	AACCC	AACCC	131314	131330	17	0	AACCCAACCCAACCCAA
VVO_S00004	ATCTA	AATCT	176882	176896	15	0	ATCTAATCTAATCTA
VVO_S00004	GTACTT	AAGTAC	209289	209311	23	0	GTACTTGTACTTGTACTTGTACT
VVO_S00004	GTCTGA	ACTCAG	218952	218978	27	0	GTCTGAGTCTGAGTCTGAGTCTGAGTC
VVO_S00004	GGTGGC	ACCGCC	239921	239938	18	0	GGTGGCGGTGGCGGTGGC
VVO_S00004	CCTCCA	ACCTCC	254915	254939	25	0	CCTCCACCTCCACCTCCACCTCCAC
VVO_S00004	GGTGT	ACACC	268805	268819	15	0	GGTGTGGTGTGGTGT
VVO_S00004	GTGGAT	ATCCAC	272444	272462	19	0	GTGGATGTGGATGTGGATG
VVO_S00004	CTC	AGG	273300	273322	23	0	CTCCTCCTCCTCCTCCTCCTCCT
VVO_S00004	CGTT	AACG	292196	292211	16	0	CGTTCGTTCGTTCGTT
VVO_S00004	GCTC	AGCG	292867	292886	20	0	GCTCGCTCGCTCGCTCGCTC
VVO_S00004	AT	AT	304478	304493	16	0	ATATATATATATATAT
VVO_S00004	ACCACG	ACCACG	320556	320573	18	0	ACCACGACCACGACCACG
VVO_S00004	CAG	AGC	358119	358135	17	0	CAGCAGCAGCAGCAGCA
VVO_S00004	GGGAGA	AGAGGG	358459	358476	18	0	GGGAGAGGGAGAGGGAGA
VVO_S00004	CGTTT	AAACG	359634	359654	21	0	CGTTTCGTTTCGTTTCGTTTC
VVO_S00004	TGTAGA	ATCTAC	379701	379718	18	0	TGTAGATGTAGATGTAGA
VVO_S00004	TTTCT	AAAAG	392675	392692	18	0	TTTCtTTTCtTTTCtTTT
VVO_S00004	CTC	AGG	423942	423957	16	0	CTCCTCCTCCTCCTCC
VVO_S00004	GGGTG	ACCCC	462895	462909	15	0	GGGTGGGGTGGGGTG
VVO_S00004	AGG	AGG	468468	468483	16	0	AGGAGGAGGAGGAGGA
VVO_S00004	AGAGCC	AGAGCC	475744	475767	24	0	AGAGCCAGAGCCAGAGCCAGAGCC
VVO_S00004	GATGCG	ATCCGC	483735	483753	19	0	GATGCGGATGCGGATGCGG
VVO_S00004	GGT	ACC	505286	505301	16	0	GGTGGTGGTGGTGGTG
VVO_S00004	AGACC	ACCAG	532494	532518	25	0	AGACCAGACCAGACCAGACCAGACC
VVO_S00004	CCA	ACC	536398	536412	15	0	CCACCACCACCACCA
VVO_S00004	TGCT	AAGC	538383	538398	16	0	TGCTTGCTTGCTTGCT
VVO_S00004	CTCG	AGCG	538497	538511	15	0	CTCGCTCGCTCGCTC
VVO_S00004	ATAAC	AACAT	563449	563463	15	0	ATAACATAACATAAC
VVO_S00004	CCAGCA	ACCAGC	566498	566515	18	0	CCAGCACCAGCACCAGCA
VVO_S00004	ACCACG	ACCACG	568763	568780	18	0	ACCACGACCACGACCACG
VVO_S00004	AGGGAG	AGAGGG	569633	569651	19	0	AGGGAGAGGGAGAGGGAGA
VVO_S00004	CGAAA	AAACG	570255	570284	30	0	CGAAACGAAACGAAACGAAACGAAACGAAA
VVO_S00004	TGC	AGC	583630	583645	16	0	TGCTGCTGCTGCTGCT
VVO_S00004	TTTA	AAAT	592737	592751	15	0	TTTATTTATTTATTT
VVO_S00004	ATTT	AAAT	592950	592968	19	0	ATTTATTTATTTATTTATT
VVO_S00004	TTATC	AAGAT	609787	609802	16	0	TTATCTTATCTTATCT
VVO_S00004	GGGGA	AGGGG	631750	631765	16	0	GGGGAGGGGAGGGGAG
VVO_S00004	TTTTC	AAAAG	662016	662032	17	0	TTTTCTTTTCTTTTCTT
VVO_S00004	TAGAT	AATCT	662073	662089	17	0	TAGATTAGATTAGATTA
VVO_S00004	GCTTGG	AAGCCC	666749	666768	20	0	GCTTGGGCTTGGGCTTGGGC
VVO_S00004	GTGCTG	ACCAGC	666771	666788	18	0	GTGCTGGTGCTGGTGCTG
VVO_S00004	TACCAG	ACTGGT	669640	669658	19	0	TACCAGTACCAGTACCAGT
VVO_S00004	TCGTGT	AACACG	671264	671284	21	0	TCGTGTTCGTGTTCGTGTTCG
VVO_S00004	TGG	ACC	708479	708495	17	0	TGGTGGTGGTGGTGGTG
VVO_S00004	GTGGGC	ACGCCC	771940	771958	19	0	GTGGGCGTGGGCGTGGGCG
VVO_S00004	CTGCAG	AGCTGC	784896	784915	20	0	CTGCAGCTGCAGCTGCAGCT
VVO_S00004	ACACAG	ACACAG	828103	828124	22	0	ACACAGACACAGACACAGACAC
VVO_S00004	CCACAG	ACAGCC	828654	828674	21	0	CCACAGCCACAGCCACAGCCA
VVO_S00004	GGACA	ACAGG	904444	904462	19	0	GGACAGGACAGGACAGGAC
VVO_S00004	CTCTC	AGAGG	908674	908689	16	0	CTCTCCTCTCCTCTCC
VVO_S00004	GGGATG	ATCCCC	909216	909239	24	0	GGGATGGGGATGGGGATGGGGATG
VVO_S00004	CCAGTG	ACTGGC	910110	910134	25	0	CCAGTGCCAGTGCCAGTGCCAGTGC
VVO_S00004	AAGG	AAGG	932653	932675	23	0	AAGGAAGGAAGGAAGGAAGGAAG
VVO_S00004	C	C	948703	948721	19	0	CCCCCCCCCCCCCCCCCCC
VVO_S00004	CTGCCC	AGGGGC	949012	949032	21	0	CTGCCCCTGCCCCTGCCCCTG
VVO_S00004	CCACTC	ACTCCC	949781	949803	23	0	CCACTCCCACTCCCACTCCCACT
VVO_S00004	TGAG	ACTC	959172	959192	21	0	TGAGTGAGTGAGTGAGTGAGT
VVO_S00004	AGAGA	AAGAG	1006979	1006993	15	0	AGAGAAGAGAAGAGA
VVO_S00004	ACCG	ACCG	1042332	1042351	20	0	ACCGACCGACCGACCGACCG
VVO_S00004	CGA	ACG	1056975	1056989	15	0	CGACGACGACGACGA
VVO_S00004	A	A	1086839	1086854	16	0	AAAAAAAAAAAAAAAA
VVO_S00004	TAATC	AATCT	1093221	1093236	16	0	TAATCTAATCTAATCT
VVO_S00004	CTTTT	AAAAG	1094149	1094163	15	0	CTTTTCTTTTCTTTT
VVO_S00004	CACCAG	ACCAGC	1106295	1106316	22	0	CACCAGCACCAGCACCAGCACC
VVO_S00004	ATGGGC	ATGCCC	1108150	1108167	18	0	ATGGGCATGGGCATGGGC
VVO_S00004	CTCTGG	AGAGCC	1108370	1108390	21	0	CTCTGGCTCTGGCTCTGGCTC
VVO_S00004	TGTCCC	ACAGGG	1109498	1109515	18	0	TGTCCCTGTCCCTGTCCC
VVO_S00004	CCG	CCG	1110335	1110351	17	0	CCGCCGCCGCCGCCGCC
VVO_S00004	CGTT	AACG	1177867	1177881	15	0	CGTTCGTTCGTTCGT
VVO_S00004	GATGA	ATCTC	1183489	1183508	20	0	GATGAGATGAGATGAGATGA
VVO_S00004	CAC	ACC	1203668	1203686	19	0	CACCACCACCACCACCACC
VVO_S00004	GGT	ACC	1205076	1205091	16	0	GGTGGTGGTGGTGGTG
VVO_S00004	GCC	CCG	1322615	1322629	15	0	GCCGCCGCCGCCGCC
VVO_S00004	GGT	ACC	1326331	1326347	17	0	GGTGGTGGTGGTGGTGG
VVO_S00004	CATCC	ATCCC	1362183	1362198	16	0	CATCCCATCCCATCCC
VVO_S00004	ATGCT	ATAGC	1362659	1362674	16	0	ATGCTATGCTATGCTA
VVO_S00004	TCATCC	ATCCTC	1478434	1478451	18	0	TCATCCTCATCCTCATCC
VVO_S00004	TCCCAA	AATCCC	1483002	1483019	18	0	TCCCAATCCCAATCCCAA
VVO_S00004	CAGGAG	AGCAGG	1524008	1524026	19	0	CAGGAGCAGGAGCAGGAGC
VVO_S00004	ACACCC	ACACCC	1557916	1557933	18	0	ACACCCACACCCACACCC
VVO_S00004	TTATCC	AAGGAT	1558587	1558606	20	0	TTATCCTTATCCTTATCCTT
VVO_S00004	ACTCCC	ACTCCC	1720081	1720098	18	0	ACTCCCACTCCCACTCCC
VVO_S00004	GAC	ACG	1753228	1753242	15	0	GACGACGACGACGAC
VVO_S00004	CCACTT	AAGTGG	1758100	1758122	23	0	CCACTTCCACTTCCACTTCCACT
VVO_S00004	GTAT	ATAC	1763053	1763070	18	0	GTATGTATGTATGTATGT
VVO_S00004	GAGGAA	AAGAGG	1783365	1783382	18	0	GAGGAAGAGGAAGAGGAA
VVO_S00004	CCCGAT	ATCCCG	1793472	1793489	18	0	CCCGATCCCGATCCCGAT
VVO_S00004	GTGGTC	ACCACG	1809377	1809405	29	0	GTGGTCGTGGTCGTGGTCGTGGTCGTGGT
VVO_S00004	CCTTC	AAGGG	1818784	1818801	18	0	CCTTCCCTTCCCTTCCCT
VVO_S00004	GCTGGT	ACCAGC	1844823	1844841	19	0	GCTGGTGCTGGTGCTGGTG
VVO_S00004	GGGTGG	ACCCCC	1897574	1897591	18	0	GGGTGGGGGTGGGGGTGG
VVO_S00004	GAAAG	AAAGG	1908421	1908435	15	0	GAAAGGAAAGGAAAG
VVO_S00004	ACC	ACC	1911328	1911342	15	0	ACCACCACCACCACC
VVO_S00004	CTTTT	AAAAG	1928440	1928454	15	0	CTTTTCTTTTCTTTT
VVO_S00004	TCCAC	ACTCC	1948672	1948686	15	0	TCCACTCCACTCCAC
VVO_S00004	AAAAG	AAAAG	2027233	2027247	15	0	AAAAGAAAAGAAAAG
VVO_S00004	GGT	ACC	2037982	2037997	16	0	GGTGGTGGTGGTGGTG
VVO_S00004	GGGAAT	AATGGG	2162258	2162277	20	0	GGGAATGGGAATGGGAATGG
VVO_S00004	TTGA	AATC	2187342	2187360	19	0	TTGATTGATTGATTGATTG
VVO_S00004	TCCTCA	ATCCTC	2232639	2232658	20	0	TCCTCATCCTCATCCTCATC
VVO_S00004	AATCC	AATCC	2260353	2260367	15	0	AATCCAATCCAATCC
VVO_S00004	CACGA	ACACG	2262668	2262692	25	0	CACGACACGACACGACACGACACGA
VVO_S00004	TA	AT	2271081	2271097	17	0	TATATATATATATATAT
VVO_S00004	CTCTTT	AAAGAG	2280865	2280884	20	0	CTCTTTCTCTTTCTCTTTCT
VVO_S00004	CTCTTC	AAGAGG	2291050	2291071	22	0	CTCTTCCTCTTCCTCTTCCTCT
VVO_S00004	TTATC	AAGAT	2294049	2294064	16	0	TTATCTTATCTTATCT
VVO_S00004	GCTCCT	AGCAGG	2297382	2297401	20	0	GCTCCTGCTCCTGCTCCTGC
VVO_S00004	CCG	CCG	2300921	2300938	18	0	CCGCCGCCGCCGCCGCCG
VVO_S00005	GAG	AGG	768474	768510	37	3	GAGGAGGAGGAAGAGGAAGAGGAGGAAGAGGAGGAGG
VVO_S00005	TCGTA	ATACG	8667	8691	25	1	TCGTATCGTATCGTATCGATATCGT
VVO_S00005	AAGAAA	AAAAAG	97732	97755	24	1	AAGAAGAAGAAAAAGAAAAAGAAA
VVO_S00005	TTTTTG	AAAAAC	780501	780536	36	1	TTTTTGtTTTTTGTTTTTGTTTTTGTTTTTGTTTTT
VVO_S00005	CCTC	AGGG	804466	804487	22	1	CCTCCCTCCCTCCCCTCCCTCC
VVO_S00005	CCA	ACC	1024897	1024921	25	1	CCACCACCACCACCACCACTACCAC
VVO_S00005	AAAAGA	AAAAAG	1029999	1030024	26	1	AAAAGAAAAGAAAAAGAAAAAGAAAA
VVO_S00005	TACA	ATAC	1405057	1405077	21	1	CATACGTACATACATACATAC
VVO_S00005	CCAT	ATCC	11082	11096	15	0	CCATCCATCCATCCA
VVO_S00005	GGT	ACC	21494	21509	16	0	GGTGGTGGTGGTGGTG
VVO_S00005	TTCAT	AAATG	53752	53766	15	0	TTCATTTCATTTCAT
VVO_S00005	AGATA	AAGAT	84718	84733	16	0	AGATAAGATAAGATAA
VVO_S00005	GTTGC	AACGC	101881	101896	16	0	GTTGCGTTGCGTTGCG
VVO_S00005	GCTGAA	AAGCTG	168270	168289	20	0	GCTGAAGCTGAAGCTGAAGC
VVO_S00005	GATAA	AAGAT	322247	322261	15	0	GATAAGATAAGATAA
VVO_S00005	CAC	ACC	326534	326549	16	0	CACCACCACCACCACC
VVO_S00005	GACGGT	ACCGTC	353416	353434	19	0	GACGGTGACGGTGACGGTG
VVO_S00005	GACTCG	ACTCGG	369865	369885	21	0	GACTCGGACTCGGACTCGGAC
VVO_S00005	CATTAC	AATGGT	390887	390906	20	0	CATTACCATTACCATTACCA
VVO_S00005	AAGAAA	AAAAAG	421095	421112	18	0	AAGAAAAAGAAAAAGAAA
VVO_S00005	AGCGTG	ACGCTC	439768	439785	18	0	AGCGTGAGCGTGAGCGTG
VVO_S00005	GGGGCT	AGCCCC	490332	490351	20	0	GGGGCTGGGGCTGGGGCTGG
VVO_S00005	AGGGA	AAGGG	491326	491341	16	0	AGGGAAGGGAAGGGAA
VVO_S00005	GGGTCG	ACCCCG	495411	495428	18	0	GGGTCGGGGTCGGGGTCG
VVO_S00005	GACA	ACAG	531797	531812	16	0	GACAGACAGACAGACA
VVO_S00005	GTT	AAC	536295	536309	15	0	GTTGTTGTTGTTGTT
VVO_S00005	GGAATG	AATGGG	608486	608503	18	0	GGAATGGGAATGGGAATG
VVO_S00005	GTGGTT	AACCAC	679177	679194	18	0	GTGGTTGTGGTTGTGGTT
VVO_S00005	GCTTTG	AAAGCC	781202	781219	18	0	GCTTTGGCTTTGGCTTTG
VVO_S00005	TTCC	AAGG	846552	846566	15	0	TTCCTTCCTTCCTTC
VVO_S00005	ATC	ATC	898068	898083	16	0	ATCATCATCATCATCA
VVO_S00005	AGGA	AAGG	904797	904812	16	0	AGGAAGGAAGGAAGGA
VVO_S00005	GCC	CCG	982489	982506	18	0	GCCGCCGCCGCCGCCGCC
VVO_S00005	GGCGCA	AGGCGC	991654	991672	19	0	GGCGCAGGCGCAGGCGCAG
VVO_S00005	GCTGGA	AGCTCC	991989	992016	28	0	GCTGGAGCTGGAGCTGGAGCTGGAGCTG
VVO_S00005	TAATC	AATCT	1029939	1029954	16	0	TAATCTAATCTAATCT
VVO_S00005	GCGTG	ACGCC	1047421	1047438	18	0	GCGTGGCGTGGCGTGGCG
VVO_S00005	GCCG	CCGG	1051038	1051052	15	0	GCCGGCCGGCCGGCC
VVO_S00005	AT	AT	1073542	1073562	21	0	ATATATATATATATATATATA
VVO_S00005	CAC	ACC	1100391	1100406	16	0	CACCACCACCACCACC
VVO_S00005	CTTGGC	AAGGCC	1114119	1114136	18	0	CTTGGCCTTGGCCTTGGC
VVO_S00005	CGAGTC	ACTCGG	1121469	1121486	18	0	CGAGTCCGAGTCCGAGTC
VVO_S00005	CTGAGC	AGCCTG	1121588	1121612	25	0	CTGAGCCTGAGCCTGAGCCTGAGCC
VVO_S00005	GAGCCG	AGCCGG	1121731	1121748	18	0	GAGCCGGAGCCGGAGCCG
VVO_S00005	TAATC	AATCT	1160247	1160262	16	0	TAATCTAATCTAATCT
VVO_S00005	AGAAA	AAAAG	1161705	1161720	16	0	AGAAAAGAAAAGAAAA
VVO_S00005	CTCG	AGCG	1193747	1193761	15	0	CTCGCTCGCTCGCTC
VVO_S00005	ACGGAC	ACACGG	1204996	1205013	18	0	ACGGACACGGACACGGAC
VVO_S00005	GTG	ACC	1206467	1206481	15	0	GTGGTGGTGGTGGTG
VVO_S00005	AAAAG	AAAAG	1212540	1212554	15	0	AAAAGAAAAGAAAAG
VVO_S00005	TGG	ACC	1232126	1232144	19	0	TGGTGGTGGTGGTGGTGGT
VVO_S00005	GGTAA	AAGGT	1241338	1241352	15	0	GGTAAGGTAAGGTAA
VVO_S00005	CCCTCT	AGAGGG	1244104	1244123	20	0	CCCTCTCCCTCTCCCTCTCC
VVO_S00005	ATTGG	AATCC	1259332	1259347	16	0	ATTGGATTGGATTGGA
VVO_S00005	ACTG	ACTG	1259603	1259621	19	0	ACTGACTGACTGACTGACT
VVO_S00005	TCCCA	ATCCC	1339093	1339107	15	0	TCCCATCCCATCCCA
VVO_S00005	GTCCA	ACTGG	1339247	1339261	15	0	GTCCAGTCCAGTCCA
VVO_S00005	CACCTC	ACCTCC	1342533	1342553	21	0	CACCTCCACCTCCACCTCCAC
VVO_S00005	TTCCA	AATGG	1343278	1343292	15	0	TTCCATTCCATTCCA
VVO_S00005	CTGC	AGGC	1347695	1347709	15	0	CTGCCTGCCTGCCTG
VVO_S00005	CGTCCA	ACGTCC	1363839	1363864	26	0	CGTCCACGTCCACGTCCACGTCCACG
VVO_S00005	GAAGAG	AAGAGG	1375610	1375627	18	0	GAAGAGGAAGAGGAAGAG
VVO_S00005	AGCACC	ACCAGC	1376308	1376328	21	0	AGCACCAGCACCAGCACCAGC
VVO_S00005	GT	AC	1400138	1400152	15	0	GTGTGTGTGTGTGTG
VVO_S00005	CCCAGA	ACCCAG	1400751	1400770	20	0	CCCAGACCCAGACCCAGACC
VVO_S00005	CTGGCT	AGAGCC	1404122	1404140	19	0	CTGGCTCTGGCTCTGGCTC
VVO_S00005	T	A	1416065	1416081	17	0	TTTTTTTTTTTTTTTTT
VVO_S00005	TCA	ATC	1438849	1438865	17	0	TCATCATCATCATCATC
VVO_S00005	GATAAT	AATGAT	1442569	1442587	19	0	GATAATGATAATGATAATG
VVO_S00005	GACGAT	ATCGTC	1511126	1511145	20	0	GACGATGACGATGACGATGA
VVO_S00005	TGCTCC	AGCAGG	1516248	1516265	18	0	TGCTCCTGCTCCTGCTCC
VVO_S00005	GCACCC	ACCCGC	1516420	1516438	19	0	GCACCCGCACCCGCACCCG
VVO_S00005	GGATG	ATCCC	1519295	1519309	15	0	GGATGGGATGGGATG
VVO_S00005	GAGG	AGGG	1549512	1549529	18	0	GAGGGAGGGAGGGAGGGA
VVO_S00005	TTGGC	AAGCC	1552007	1552021	15	0	TTGGCTTGGCTTGGC
VVO_S00005	ATGAGA	AATGAG	1565980	1565997	18	0	ATGAGAATGAGAATGAGA
VVO_S00005	AGG	AGG	1567220	1567239	20	0	AGGAGGAGGAGGAGGAGGAG
VVO_S00005	GCTTT	AAAGC	1584755	1584770	16	0	GCTTTGCTTTGCTTTG
VVO_S00005	CATCT	ATCTC	1585197	1585211	15	0	CATCTCATCTCATCT
VVO_S00005	CGA	ACG	1596536	1596551	16	0	CGACGACGACGACGAC
VVO_S00005	GAC	ACG	1598143	1598165	23	0	GACGACGACGACGACGACGACGA
VVO_S00005	ATCGTC	ATCGTC	1641569	1641586	18	0	ATCGTCATCGTCATCGTC
VVO_S00005	T	A	1667366	1667380	15	0	TTTTTTTTTTTTTTT
VVO_S00005	GGAAAC	AAACGG	1684356	1684375	20	0	GGAAACGGAAACGGAAACGG
VVO_S00005	GGTGCG	ACCCGC	1687830	1687849	20	0	GGTGCGGGTGCGGGTGCGGG
VVO_S00005	ATCTT	AAGAT	1698512	1698527	16	0	ATCTTATCTTATCTTA
VVO_S00005	CTCAT	ATCTC	1727112	1727127	16	0	CTCATCTCATCTCATC
VVO_S00005	TTCG	AACG	1727746	1727761	16	0	TTCGTTCGTTCGTTCG
VVO_S00005	CCCAT	ATCCC	1744460	1744474	15	0	CCCATCCCATCCCAT
VVO_S00005	GAAGAC	AAGACG	1808650	1808669	20	0	GAAGACGAAGACGAAGACGA
VVO_S00005	TGCTT	AAAGC	1835328	1835342	15	0	TGCTTTGCTTTGCTT
VVO_S00005	GTAGTC	ACTACG	1872196	1872217	22	0	GTAGTCGTAGTCGTAGTCGTAG
VVO_S00006	GAGCCA	AGAGCC	1182577	1182621	45	3	GAGCCAGAACCAGAACCCGAGCCAGAGCCAGAGCCAGAGCCAGAG
VVO_S00006	TTTTC	AAAAG	62484	62515	32	2	TTTTCTTTTTCtTTTTCTTTTCTTTTCTTTTC
VVO_S00006	AAACCA	AAAACC	397443	397475	33	2	CAAAACCAAAGCCGAAACCAAAACCAAAACCAA
VVO_S00006	CCT	AGG	1334043	1334071	29	2	CCTCCTCCTCCTCCTCCGCATCCTCCTCC
VVO_S00006	GGC	CCG	28765	28785	21	1	GGCGGCGGCGGCTGCGGCGGC
VVO_S00006	CTTTT	AAAAG	260274	260301	28	1	TTTTCTTTTtCTTTTCTTTTCTTTTCTT
VVO_S00006	GGGTGT	ACACCC	514161	514185	25	1	GGGTGCGGGTGTGGGTGTGGGTGTG
VVO_S00006	CTGCAC	ACCTGC	645995	646019	25	1	CTGCACCTGCACCTGCACCCGCACC
VVO_S00006	TCC	AGG	720778	720801	24	1	TCCTCATCCTCCTCCTCCTCCTCC
VVO_S00006	TCC	AGG	720833	720854	22	1	CCTCCTCATCCTCCTCCTCCTC
VVO_S00006	CCT	AGG	841501	841528	28	1	CCTCCTCCTCTTCCTCCTCCTCCTCCTC
VVO_S00006	T	A	954090	954137	48	1	tttttttttttttttttttttttttttttttttNtttttttttttttt
VVO_S00006	GTGCCA	ACTGGC	1173025	1173048	24	1	GTGCCGGTGCCAGTGCCAGTGCCA
VVO_S00006	T	A	1204514	1204535	22	1	TTTTTTTTTTTtTTTTTTTTTT
VVO_S00006	CGACCT	ACCTCG	1296493	1296516	24	1	CGACCCCGACCTCGACCTCGACCT
VVO_S00006	CAC	ACC	7333	7347	15	0	CACCACCACCACCAC
VVO_S00006	CATGCC	ATGCCC	25024	25044	21	0	CATGCCCATGCCCATGCCCAT
VVO_S00006	AGATT	AATCT	62554	62569	16	0	AGATTAGATTAGATTA
VVO_S00006	GGGGA	AGGGG	103768	103783	16	0	GGGGAGGGGAGGGGAG
VVO_S00006	ATAG	ATAG	164224	164244	21	0	ATAGATAGATAGATAGATAGA
VVO_S00006	TGATA	ATATC	166305	166319	15	0	TGATATGATATGATA
VVO_S00006	ATTCA	AATTC	166651	166666	16	0	ATTCAATTCAATTCAA
VVO_S00006	C	C	166736	166751	16	0	CCCCCCCCCCCCCCCC
VVO_S00006	CTGTTG	AACAGC	168374	168394	21	0	CTGTTGCTGTTGCTGTTGCTG
VVO_S00006	GTGCT	ACAGC	171533	171547	15	0	GTGCTGTGCTGTGCT
VVO_S00006	AAAGA	AAAAG	191622	191636	15	0	AAAGAAAAGAAAAGA
VVO_S00006	TCCCCA	ATCCCC	200199	200219	21	0	TCCCCATCCCCATCCCCATCC
VVO_S00006	GACGC	ACGCG	278057	278072	16	0	GACGCGACGCGACGCG
VVO_S00006	ATGGT	ATACC	322672	322686	15	0	ATGGTATGGTATGGT
VVO_S00006	GTGTCC	ACACGG	330789	330806	18	0	GTGTCCGTGTCCGTGTCC
VVO_S00006	GGGGA	AGGGG	333568	333582	15	0	GGGGAGGGGAGGGGA
VVO_S00006	TCAAT	AATTC	334929	334943	15	0	TCAATTCAATTCAAT
VVO_S00006	TTGCCC	AAGGGC	353648	353665	18	0	TTGCCCTTGCCCTTGCCC
VVO_S00006	GGAGTC	ACTCCG	374570	374588	19	0	GGAGTCGGAGTCGGAGTCG
VVO_S00006	TCTTGC	AAGAGC	382383	382405	23	0	TCTTGCTCTTGCTCTTGCTCTTG
VVO_S00006	AGC	AGC	387387	387403	17	0	AGCAGCAGCAGCAGCAG
VVO_S00006	CCAG	AGCC	414373	414389	17	0	CCAGCCAGCCAGCCAGC
VVO_S00006	TACGGC	ACGGCT	420896	420915	20	0	TACGGCTACGGCTACGGCTA
VVO_S00006	TCGGAC	ACTCGG	459030	459051	22	0	TCGGACTCGGACTCGGACTCGG
VVO_S00006	CACCT	ACCTC	476540	476558	19	0	CACCTCACCTCACCTCACC
VVO_S00006	GACGAG	ACGAGG	497123	497147	25	0	GACGAGGACGAGGACGAGGACGAGG
VVO_S00006	GAATTC	AATTCG	572000	572018	19	0	GAATTCGAATTCGAATTCG
VVO_S00006	GAAGGA	AAGGAG	580515	580533	19	0	GAAGGAGAAGGAGAAGGAG
VVO_S00006	GGCTGC	AGCCGC	613134	613151	18	0	GGCTGCGGCTGCGGCTGC
VVO_S00006	CTG	AGC	614254	614278	25	0	CTGCTGCTGCTGCTGCTGCTGCTGC
VVO_S00006	TGC	AGC	715382	715401	20	0	TGCTGCTGCTGCTGCTGCTG
VVO_S00006	CCCTCC	AGGGGG	716196	716213	18	0	CCCTCCCCCTCCCCCTCC
VVO_S00006	TCCGAG	ACTCGG	716558	716579	22	0	TCCGAGTCCGAGTCCGAGTCCG
VVO_S00006	TCCATA	ATATCC	719076	719097	22	0	TCCATATCCATATCCATATCCA
VVO_S00006	ATCCCC	ATCCCC	721432	721455	24	0	ATCCCCATCCCCATCCCCATCCCC
VVO_S00006	CTGACA	ACACTG	724672	724691	20	0	CTGACACTGACACTGACACT
VVO_S00006	TGGT	AACC	765056	765079	24	0	TGGTTGGTTGGTTGGTTGGTTGGT
VVO_S00006	AGAAGG	AAGGAG	793459	793477	19	0	AGAAGGAGAAGGAGAAGGA
VVO_S00006	GGGT	ACCC	802839	802854	16	0	GGGTGGGTGGGTGGGT
VVO_S00006	GCT	AGC	840744	840760	17	0	GCTGCTGCTGCTGCTGC
VVO_S00006	CCCGG	CCCGG	912656	912671	16	0	CCCGGCCCGGCCCGGC
VVO_S00006	GGAGG	AGGGG	914840	914855	16	0	GGAGGGGAGGGGAGGG
VVO_S00006	GGA	AGG	916410	916424	15	0	GGAGGAGGAGGAGGA
VVO_S00006	GAC	ACG	916567	916582	16	0	GACGACGACGACGACG
VVO_S00006	CATGGA	ATGTCC	920448	920467	20	0	CATGGACATGGACATGGACA
VVO_S00006	ACCAGC	ACCAGC	923522	923540	19	0	ACCAGCACCAGCACCAGCA
VVO_S00006	CCGAGT	ACTCGG	939890	939909	20	0	CCGAGTCCGAGTCCGAGTCC
VVO_S00006	CAAATT	AAATTC	1015001	1015019	19	0	CAAATTCAAATTCAAATTC
VVO_S00006	TTTA	AAAT	1023192	1023206	15	0	TTTATTTATTTATTT
VVO_S00006	TATT	AAAT	1023293	1023308	16	0	TATTTATTTATTTATT
VVO_S00006	ATGGAG	ATCTCC	1072428	1072447	20	0	ATGGAGATGGAGATGGAGAT
VVO_S00006	CACCAG	ACCAGC	1077525	1077542	18	0	CACCAGCACCAGCACCAG
VVO_S00006	AAGAG	AAGAG	1079224	1079247	24	0	AAGAGAAGAGAAGAGAAGAGAAGA
VVO_S00006	CAGTCA	ACAGTC	1093561	1093580	20	0	CAGTCACAGTCACAGTCACA
VVO_S00006	AGGGG	AGGGG	1121819	1121833	15	0	AGGGGAGGGGAGGGG
VVO_S00006	AAATC	AAATC	1157161	1157177	17	0	AAATCAAATCAAATCAA
VVO_S00006	CCACCT	ACCTCC	1182628	1182645	18	0	CCACCTCCACCTCCACCT
VVO_S00006	CCA	ACC	1182652	1182668	17	0	CCACCACCACCACCACC
VVO_S00006	CCTGAA	AACCTG	1183164	1183183	20	0	CCTGAACCTGAACCTGAACC
VVO_S00006	CCACCT	ACCTCC	1183194	1183216	23	0	CCACCTCCACCTCCACCTCCACC
VVO_S00006	GAGAAG	AAGGAG	1191494	1191513	20	0	GAGAAGGAGAAGGAGAAGGA
VVO_S00006	TA	AT	1194828	1194842	15	0	TATATATATATATAT
VVO_S00006	TGTGAT	AATCAC	1211770	1211791	22	0	TGTGATTGTGATTGTGATTGTG
VVO_S00006	CTG	AGC	1215260	1215275	16	0	CTGCTGCTGCTGCTGC
VVO_S00006	CATCCA	ATCCAC	1215538	1215559	22	0	CATCCACATCCACATCCACATC
VVO_S00006	CTC	AGG	1217003	1217018	16	0	CTCCTCCTCCTCCTCC
VVO_S00006	TACAGG	ACAGGT	1217709	1217726	18	0	TACAGGTACAGGTACAGG
VVO_S00006	CATGC	ATGCC	1220343	1220362	20	0	CATGCCATGCCATGCCATGC
VVO_S00006	TTTC	AAAG	1238705	1238722	18	0	TTTCTTTCTTTCTTTCTT
VVO_S00006	CAAGCA	AAGCAC	1274321	1274342	22	0	CAAGCACAAGCACAAGCACAAG
VVO_S00006	AGAC	ACAG	1295557	1295573	17	0	AGACAGACAGACAGACA
VVO_S00006	CCCGAT	ATCCCG	1296557	1296579	23	0	CCCGATCCCGATCCCGATCCCGA
VVO_S00006	CCAGAA	AACCAG	1296587	1296607	21	0	CCAGAACCAGAACCAGAACCA
VVO_S00006	GCGGTG	ACCGCC	1297906	1297926	21	0	GCGGTGGCGGTGGCGGTGGCG
VVO_S00006	GGAGTT	AACTCC	1336057	1336077	21	0	GGAGTTGGAGTTGGAGTTGGA
VVO_S00006	CTTCGA	AAGTCG	1336082	1336115	34	0	CTTCGACTTCGACTTCGACTTCGACTTCGACTTC
VVO_S00006	CAGCCT	AGCCTC	1336408	1336427	20	0	CAGCCTCAGCCTCAGCCTCA
VVO_S00006	ACAGCA	AACAGC	1336851	1336868	18	0	ACAGCAACAGCAACAGCA
VVO_S00006	TGAATC	AATCTG	1345016	1345037	22	0	TGAATCTGAATCTGAATCTGAA
VVO_S00006	CTCAG	AGCTC	1356378	1356393	16	0	CTCAGCTCAGCTCAGC
VVO_S00006	ATGTTG	AACATC	1367913	1367930	18	0	ATGTTGATGTTGATGTTG
VVO_S00006	AAAAG	AAAAG	1372638	1372654	17	0	AAAAGAAAAGAAAAGAA
VVO_S00006	GGAACG	AACGGG	1391993	1392010	18	0	GGAACGGGAACGGGAACG
VVO_S00007	TC	AG	54926	54962	37	4	TCTCTTTCTCTCTCTCTTCTCTCTCCTTCTCTCTCTC
VVO_S00007	CAACCG	AACCGC	268703	268743	41	2	CAACCACAACCGCAACCGCAACCGCAACCACAACCGCAACC
VVO_S00007	AAGAA	AAAAG	35769	35791	23	1	AAGAAAAGAAAAGAAAAAGAAAA
VVO_S00007	AAGAA	AAAAG	152208	152235	28	1	AAGAAAAGAAAAGAAAAGAAGAGAAAAG
VVO_S00007	GGTGCA	ACCTGC	760514	760542	29	1	AGGTGCGGGTGCAGGTGCAGGTGCAGGTG
VVO_S00007	GGT	ACC	921025	921046	22	1	GGTGGTGGTGGTTGTGGTGGTG
VVO_S00007	GGTTGC	AACCGC	1171943	1171971	29	1	GGTTGCGGTTGCGGTTGCGGTTGAGGTTG
VVO_S00007	CTTTTC	AAAAGG	8601	8619	19	0	CTTTTCCTTTTCCTTTTCC
VVO_S00007	TGGATC	ATCTGG	34271	34294	24	0	TGGATCTGGATCTGGATCTGGATC
VVO_S00007	TAATC	AATCT	35717	35732	16	0	TAATCTAATCTAATCT
VVO_S00007	TAATC	AATCT	45648	45663	16	0	TAATCTAATCTAATCT
VVO_S00007	TTCCA	AATGG	76552	76568	17	0	TTCCATTCCATTCCATT
VVO_S00007	TCGTCC	ACGAGG	94023	94042	20	0	TCGTCCTCGTCCTCGTCCTC
VVO_S00007	GGGCAG	AGGGGC	95612	95634	23	0	GGGCAGGGGCAGGGGCAGGGGCA
VVO_S00007	ACCTG	ACCTG	96514	96528	15	0	ACCTGACCTGACCTG
VVO_S00007	GTC	ACG	96706	96720	15	0	GTCGTCGTCGTCGTC
VVO_S00007	CGGTTG	AACCGC	97136	97162	27	0	CGGTTGCGGTTGCGGTTGCGGTTGCGG
VVO_S00007	GTGTAT	ATACAC	114574	114591	18	0	GTGTATGTGTATGTGTAT
VVO_S00007	AGCGC	AGCGC	116024	116038	15	0	AGCGCAGCGCAGCGC
VVO_S00007	TCCA	ATCC	116054	116069	16	0	TCCATCCATCCATCCA
VVO_S00007	TGGTG	ACACC	116323	116340	18	0	TGGTGTGGTGTGGTGTGG
VVO_S00007	CAG	AGC	119885	119909	25	0	CAGCAGCAGCAGCAGCAGCAGCAGC
VVO_S00007	TAATC	AATCT	152156	152171	16	0	TAATCTAATCTAATCT
VVO_S00007	GTGCCA	ACTGGC	174525	174544	20	0	GTGCCAGTGCCAGTGCCAGT
VVO_S00007	GCTCTG	AGAGCC	175142	175161	20	0	GCTCTGGCTCTGGCTCTGGC
VVO_S00007	GATTGC	AATCGC	176406	176431	26	0	GATTGCGATTGCGATTGCGATTGCGA
VVO_S00007	TTTGGA	AAATCC	177000	177019	20	0	TTTGGATTTGGATTTGGATT
VVO_S00007	CCA	ACC	191443	191457	15	0	CCACCACCACCACCA
VVO_S00007	GATG	ATCC	210042	210057	16	0	GATGGATGGATGGATG
VVO_S00007	CACCTT	AAGGTG	249569	249586	18	0	CACCTTCACCTTCACCTT
VVO_S00007	GAC	ACG	320416	320439	24	0	GACGACGACGACGACGACGACGAC
VVO_S00007	TCCCTC	AGAGGG	407043	407060	18	0	TCCCTCTCCCTCTCCCTC
VVO_S00007	ATCCAC	ATCCAC	484202	484219	18	0	ATCCACATCCACATCCAC
VVO_S00007	CACCCC	ACCCCC	546520	546544	25	0	CAcCCCCAcCCCCAcCCCCAcCCCC
VVO_S00007	AGC	AGC	629487	629502	16	0	AGCAGCAGCAGCAGCA
VVO_S00007	AACCGC	AACCGC	659287	659308	22	0	AACCGCAACCGCAACCGCAACC
VVO_S00007	TTTTCT	AAAAAG	736252	736269	18	0	TTTTCTTTTTCTTTTTCT
VVO_S00007	ATGTT	AACAT	926564	926582	19	0	ATGTTATGTTATGTTATGT
VVO_S00007	TCCC	AGGG	936429	936449	21	0	TCCCTCCCTCCCTCCCTCCCT
VVO_S00007	TCTCCT	AAGGAG	937555	937578	24	0	TCTCCTTCTCCTTCTCCTTCTCCT
VVO_S00007	TGC	AGC	951382	951398	17	0	TGCTGCTGCTGCTGCTG
VVO_S00007	T	A	962633	962649	17	0	ttttttttttttttttt
VVO_S00007	CTGGTG	ACCAGC	1014357	1014375	19	0	CTGGTGCTGGTGCTGGTGC
VVO_S00007	CGACAC	ACACCG	1146479	1146501	23	0	CGACACCGACACCGACACCGACA
VVO_S00007	TACAT	AATGT	1168400	1168414	15	0	TACATTACATTACAT
VVO_S00007	GGGTTC	AACCCG	1171600	1171617	18	0	GGGTTCGGGTTCGGGTTC
VVO_S00007	CCTCC	AGGGG	1222954	1222970	17	0	CCTCCCCTCCCCTCCCC
VVO_S00007	CACCC	ACCCC	1223159	1223173	15	0	CACCCCACCCCACCC
VVO_S00007	TCG	ACG	1241344	1241360	17	0	TCGTCGTCGTCGTCGTC
VVO_S00007	GGATG	ATCCC	1314344	1314359	16	0	GGATGGGATGGGATGG
VVO_S00007	CCATCG	ATCGCC	1323007	1323026	20	0	CCATCGCCATCGCCATCGCC
VVO_S00008	ATTA	AATT	65902	65928	27	2	AATTAATTAACTCATTAATTAATTAAT
VVO_S00008	ACA	AAC	407389	407416	28	2	ACAACAACAAGAACAACAAGAACAACAA
VVO_S00008	GAG	AGG	878959	878987	29	2	GAGGAGGAGGAGGAAGAGGAGGAAGAGGA
VVO_S00008	AAGAA	AAAAG	1046117	1046145	29	2	AAGAAAAGAAAAGAAACAGAAAAAGAAAA
VVO_S00008	GGA	AGG	1083390	1083418	29	2	GAGGAGGATGGGGAGGAGGAGGAGGAGGA
VVO_S00008	TCTTCC	AAGAGG	69030	69055	26	1	TCTTCCTCTTCCTCTTCCTCCTCCTC
VVO_S00008	GTC	ACG	70499	70522	24	1	CGTCGTTGTCGTCGTCGTCGTCGT
VVO_S00008	CTG	AGC	70583	70606	24	1	CTGCTGCTGCTGCTGTTGCTGCTG
VVO_S00008	CCA	ACC	111074	111097	24	1	CCACCACCACCATCACCACCACCA
VVO_S00008	GTG	ACC	127150	127176	27	1	GTGGTGGTGGTGGTGGTgGTGGTGGTG
VVO_S00008	CTG	AGC	152609	152630	22	1	CTGCTGCTGTTGCTGCTGCTGC
VVO_S00008	TCC	AGG	364490	364512	23	1	TCCTCTTCCTCCTCCTCCTCCTC
VVO_S00008	TTC	AAG	364513	364533	21	1	TTCTTCTTCTTCTTCCTCTTC
VVO_S00008	CTATGA	ATAGTC	515586	515621	36	1	CTATGACTATGACTATGACTATGACTATGGCTATGA
VVO_S00008	GGTGCT	ACCAGC	515871	515900	30	1	GGTGCGGGTGCTGGTGCTGGTGCTGGTGCT
VVO_S00008	CGA	ACG	516032	516058	27	1	CGACGACGACGACAACGACGACGACGA
VVO_S00008	CTGTTT	AAACAG	610430	610462	33	1	CTGTTTCTGTTTCTGTTTCTGCTTCTGTTTCTG
VVO_S00008	GGGTTG	AACCCC	628088	628116	29	1	GGTTGGGGTTGGGTTGGGGTTGGGGTTGG
VVO_S00008	AGAA	AAAG	811019	811040	22	1	AAGAAGAGAAAGAAAGAAAGAA
VVO_S00008	CCT	AGG	1140304	1140325	22	1	CCTCCTCCCCTCCTCCTCCTCC
VVO_S00008	CGT	ACG	8063	8078	16	0	CGTCGTCGTCGTCGTC
VVO_S00008	ACTGA	AACTG	8282	8298	17	0	ACTGAACTGAACTGAAC
VVO_S00008	AGATTG	AATCTC	72548	72565	18	0	AGATTGAGATTGAGATTG
VVO_S00008	TCG	ACG	74815	74829	15	0	TCGTCGTCGTCGTCG
VVO_S00008	TTA	AAT	104039	104055	17	0	TTATTATTATTATTATT
VVO_S00008	TCCTC	AGAGG	110168	110187	20	0	TCCTCTCCTCTCCTCTCCTC
VVO_S00008	GCCTC	AGGCG	110993	111009	17	0	GCCTCGCCTCGCCTCGC
VVO_S00008	AGCCA	AAGCC	120457	120471	15	0	AGCCAAGCCAAGCCA
VVO_S00008	ATGAA	AAATG	127974	127988	15	0	ATGAAATGAAATGAA
VVO_S00008	CTTG	AAGC	136405	136419	15	0	CTTGCTTGCTTGCTT
VVO_S00008	AGGAT	ATAGG	150242	150258	17	0	AGGATAGGATAGGATAG
VVO_S00008	TTTTC	AAAAG	181359	181380	22	0	TTTTCTTTTCTTTTCTTTTCTT
VVO_S00008	TTTTC	AAAAG	182052	182067	16	0	TTTTCTTTTCTTTTCT
VVO_S00008	ACTAA	AAACT	198460	198474	15	0	ACTAAACTAAACTAA
VVO_S00008	TGTCGT	AACGAC	203640	203657	18	0	TGTCGTTGTCGTTGTCGT
VVO_S00008	AGATA	AAGAT	207905	207923	19	0	AGATAAGATAAGATAAGAT
VVO_S00008	GATAA	AAGAT	257793	257807	15	0	GATAAGATAAGATAA
VVO_S00008	A	A	275735	275756	22	0	AAAAAAAAAAAAAAAAAAAAAA
VVO_S00008	TCTCT	AAGAG	343099	343115	17	0	TCTCTTCTCTTCTCTTC
VVO_S00008	CCA	ACC	348729	348743	15	0	CCACCACCACCACCA
VVO_S00008	TGAGGA	ATCCTC	407895	407912	18	0	TGAGGATGAGGATGAGGA
VVO_S00008	GCA	AGC	450243	450258	16	0	GCAGCAGCAGCAGCAG
VVO_S00008	TCGTC	ACGAG	453592	453618	27	0	TCGTCTCGTCTCGTCTCGTCTCGTCTC
VVO_S00008	GACAG	ACAGG	463680	463695	16	0	GACAGGACAGGACAGG
VVO_S00008	CCCCTC	AGGGGG	466813	466831	19	0	CCCCTCCCCCTCCCCCTCC
VVO_S00008	CCTTCT	AAGGAG	500842	500860	19	0	CCTTCTCCTTCTCCTTCTC
VVO_S00008	CTTCTC	AAGGAG	515072	515092	21	0	CTTCTCCTTCTCCTTCTCCTT
VVO_S00008	TGCCGG	ACCGGC	516089	516111	23	0	TGCCGGTGCCGGTGCCGGTGCCG
VVO_S00008	CTCTTG	AAGAGC	516861	516878	18	0	CTCTTGCTCTTGCTCTTG
VVO_S00008	CGC	CCG	517617	517633	17	0	CGCCGCCGCCGCCGCCG
VVO_S00008	CGAGCA	ACGAGC	520163	520182	20	0	CGAGCACGAGCACGAGCACG
VVO_S00008	TACGAA	AATACG	532402	532435	34	0	TACGAATACGAATACGAATACGAATACGAATACG
VVO_S00008	TTAT	AAAT	550180	550196	17	0	TTATTTATTTATTTATT
VVO_S00008	GCT	AGC	573956	573970	15	0	GCTGCTGCTGCTGCT
VVO_S00008	CTTC	AAGG	663966	663980	15	0	CTTCCTTCCTTCCTT
VVO_S00008	GAC	ACG	668636	668652	17	0	GACGACGACGACGACGA
VVO_S00008	GACGTC	ACGTCG	671981	672002	22	0	GACGTCGACGTCGACGTCGACG
VVO_S00008	AACTGG	AACTGG	733756	733773	18	0	AACTGGAACTGGAACTGG
VVO_S00008	TGG	ACC	753867	753883	17	0	TGGTGGTGGTGGTGGTG
VVO_S00008	GCTCAA	AAGCTC	800786	800809	24	0	GCTCAAGCTCAAGCTCAAGCTCAA
VVO_S00008	T	A	858145	858161	17	0	TTTTTTTTTTTTTTTTT
VVO_S00008	GAG	AGG	881574	881588	15	0	GAGGAGGAGGAGGAG
VVO_S00008	TCATT	AAATG	883477	883491	15	0	TCATTTCATTTCATT
VVO_S00008	AAGGAC	AAGGAC	1009616	1009636	21	0	AAGGACAAGGACAAGGACAAG
VVO_S00008	CATTGT	AATGAC	1035389	1035407	19	0	CATTGTCATTGTCATTGTC
VVO_S00008	AAGAA	AAAAG	1038543	1038558	16	0	AAGAAAAGAAAAGAAA
VVO_S00008	TGAAGA	AAGATG	1050781	1050800	20	0	TGAAGATGAAGATGAAGATG
VVO_S00008	GAT	ATC	1060244	1060263	20	0	GATGATGATGATGATGATGA
VVO_S00008	GAAAC	AAACG	1103595	1103609	15	0	GAAACGAAACGAAAC
VVO_S00008	CGAATC	AATCCG	1107947	1107965	19	0	CGAATCCGAATCCGAATCC
VVO_S00008	TGCTCG	ACGAGC	1108495	1108521	27	0	TGCTCGTGCTCGTGCTCGTGCTCGTGC
VVO_S00008	GGTATC	ATACCG	1108766	1108783	18	0	GGTATCGGTATCGGTATC
VVO_S00008	TTCA	AATG	1115453	1115468	16	0	TTCATTCATTCATTCA
VVO_S00008	GGTGGA	ACCTCC	1130113	1130130	18	0	GGTGGAGGTGGAGGTGGA
VVO_S00008	AAAT	AAAT	1150004	1150022	19	0	AAATAAATAAATAAATAAA
VVO_S00008	GTC	ACG	1157968	1157990	23	0	GTCGTCGTCGTCGTCGTCGTCGT
VVO_S00008	CCAACT	AACTCC	1160379	1160396	18	0	CCAACTCCAACTCCAACT
VVO_S00008	GTGC	ACGC	1165082	1165099	18	0	GTGCGTGCGTGCGTGCGT
VVO_S00008	ACGAC	ACACG	1166184	1166202	19	0	ACGACACGACACGACACGA
VVO_S00008	CCTG	AGGC	1185156	1185170	15	0	CCTGCCTGCCTGCCT
VVO_S00008	CAATA	AATAC	1228344	1228358	15	0	CAATACAATACAATA
VVO_S00009	TACA	ATAC	212933	212967	35	3	TACATACACACTACATACATACATATATACATACA
VVO_S00009	TCAGT	AACTG	198310	198331	22	1	GTTCAGCTCAGTTCAGTTCAGT
VVO_S00009	AAGAA	AAAAG	432151	432174	24	1	AAGAAAAGAAAAGAAAAAGAAAAG
VVO_S00009	TTTTC	AAAAG	556974	557006	33	1	TTTTCTTTTTCTTTTCTTTTCTTTTCTTTTCTT
VVO_S00009	CCAGCA	ACCAGC	928067	928090	24	1	CCAGCACCAGCACCAGCAGCAGCA
VVO_S00009	TTTCG	AAACG	23147	23163	17	0	TTTCGTTTCGTTTCGTT
VVO_S00009	CCCAAC	AACCCC	26414	26431	18	0	CCCAACCCCAACCCCAAC
VVO_S00009	AGTCCG	ACTCGG	64298	64325	28	0	AGTCCGAGTCCGAGTCCGAGTCCGAGTC
VVO_S00009	CCGCA	ACCGC	113062	113078	17	0	CCGCACCGCACCGCACC
VVO_S00009	CAGAAG	AAGCAG	122670	122688	19	0	CAGAAGCAGAAGCAGAAGC
VVO_S00009	GACTCG	ACTCGG	125073	125092	20	0	GACTCGGACTCGGACTCGGA
VVO_S00009	TTTTC	AAAAG	145238	145259	22	0	TTTTCTTTTCTTTTCTTTTCTT
VVO_S00009	GGTT	AACC	219134	219148	15	0	GGTTGGTTGGTTGGT
VVO_S00009	TCGGAC	ACTCGG	241338	241356	19	0	TCGGACTCGGACTCGGACT
VVO_S00009	GAAGAG	AAGAGG	251742	251762	21	0	GAAGAGGAAGAGGAAGAGGAA
VVO_S00009	TCGACT	AAGTCG	281953	281970	18	0	TCGACTTCGACTTCGACT
VVO_S00009	CCTCAG	AGCCTC	368622	368641	20	0	CCTCAGCCTCAGCCTCAGCC
VVO_S00009	TCCTT	AAAGG	413550	413570	21	0	TCCTTTCCTTTCCTTTCCTTT
VVO_S00009	TAATC	AATCT	432099	432114	16	0	TAATCTAATCTAATCT
VVO_S00009	TTTCTT	AAAAAG	434842	434873	32	0	TTTCTTTTTCTTTTTCTTTTTCTTTTTCTTTT
VVO_S00009	AGATT	AATCT	434912	434927	16	0	AGATTAGATTAGATTA
VVO_S00009	CAC	ACC	462759	462774	16	0	CACCACCACCACCACC
VVO_S00009	TAATC	AATCT	471538	471553	16	0	TAATCTAATCTAATCT
VVO_S00009	TTTC	AAAG	490337	490352	16	0	TTTCTTTCTTTCTTTC
VVO_S00009	CTCCAG	AGCTCC	508061	508078	18	0	CTCCAGCTCCAGCTCCAG
VVO_S00009	GATGAC	ATCGTC	551978	552001	24	0	GATGACGATGACGATGACGATGAC
VVO_S00009	TTTTCC	AAAAGG	556173	556196	24	0	TTTTCCTTTTCCTTTTCCTTTTCC
VVO_S00009	AGATT	AATCT	557048	557063	16	0	AGATTAGATTAGATTA
VVO_S00009	AGGGG	AGGGG	565164	565182	19	0	AGGGgAGGGgAGGGgAGGG
VVO_S00009	CCTTT	AAAGG	567999	568016	18	0	CCTTTCCTTTCCTTTCCT
VVO_S00009	TGTCCA	ATGTCC	568710	568728	19	0	TGTCCATGTCCATGTCCAT
VVO_S00009	TGTTC	AACAG	570699	570714	16	0	TGTTCTGTTCTGTTCT
VVO_S00009	GAA	AAG	571347	571361	15	0	GAAGAAGAAGAAGAA
VVO_S00009	GGA	AGG	571688	571702	15	0	GGAGGAGGAGGAGGA
VVO_S00009	GGATCG	ATCCCG	572681	572698	18	0	GGATCGGGATCGGGATCG
VVO_S00009	GGTATG	ATACCC	573092	573111	20	0	GGTATGGGTATGGGTATGGG
VVO_S00009	GATGAC	ATCGTC	604734	604756	23	0	GATGACGATGACGATGACGATGA
VVO_S00009	GTG	ACC	605058	605072	15	0	GTGGTGGTGGTGGTG
VVO_S00009	TCATTG	AATGAC	630746	630763	18	0	TCATTGTCATTGTCATTG
VVO_S00009	TCCCAC	ACTCCC	631828	631845	18	0	TCCCACTCCCACTCCCAC
VVO_S00009	TTATC	AAGAT	646577	646591	15	0	TTATCTTATCTTATC
VVO_S00009	TTATC	AAGAT	667170	667184	15	0	TTATCTTATCTTATC
VVO_S00009	TAATC	AATCT	671791	671806	16	0	TAATCTAATCTAATCT
VVO_S00009	CTGC	AGGC	730013	730032	20	0	CTGCCTGCCTGCCTGCCTGC
VVO_S00009	CAACAG	AACAGC	738834	738851	18	0	CAACAGCAACAGCAACAG
VVO_S00009	AAAGC	AAAGC	744304	744318	15	0	AAAGCAAAGCAAAGC
VVO_S00009	A	A	764140	764154	15	0	aaaaaaaaaaaaaaa
VVO_S00009	CCCTC	AGGGG	766644	766658	15	0	CCCTCCCCTCCCCTC
VVO_S00009	GCTT	AAGC	767800	767815	16	0	GCTTGCTTGCTTGCTT
VVO_S00009	CGCCAC	ACCGCC	768520	768537	18	0	CGCCACCGCCACCGCCAC
VVO_S00009	AGATT	AATCT	792344	792359	16	0	AGATTAGATTAGATTA
VVO_S00009	TCCTGG	ACCAGG	803579	803599	21	0	TCCTGGTCCTGGTCCTGGTCC
VVO_S00009	GGGAAC	AACGGG	804178	804199	22	0	GGGAACGGGAACGGGAACGGGA
VVO_S00009	TCGATG	ATCGAC	804837	804854	18	0	TCGATGTCGATGTCGATG
VVO_S00009	CGC	CCG	804874	804890	17	0	CGCCGCCGCCGCCGCCG
VVO_S00009	GAGAGG	AGAGGG	804933	804953	21	0	GAGAGGGAGAGGGAGAGGGAG
VVO_S00009	GGATAT	ATATCC	814118	814147	30	0	GGATATGGATATGGATATGGATATGGATAT
VVO_S00009	CTGCAA	AACTGC	819156	819177	22	0	CTGCAACTGCAACTGCAACTGC
VVO_S00009	TCCCC	AGGGG	869707	869723	17	0	TCCCCTCCCCTCCCCTC
VVO_S00009	GTTC	AACG	871506	871521	16	0	GTTCGTTCGTTCGTTC
VVO_S00009	TCAGGC	AGCCTG	872227	872250	24	0	TCAGGCTCAGGCTCAGGCTCAGGC
VVO_S00009	TACG	ACGT	872334	872348	15	0	TACGTACGTACGTAC
VVO_S00010	TTTTC	AAAAG	217394	217427	34	2	TTTTCTTTTCCTTTTCTTTTTCTTTTCTTTTCTT
VVO_S00010	TCC	AGG	741745	741765	21	1	TCCTCCTCCTCCTCCCTCCTC
VVO_S00010	AAGAA	AAAAG	905090	905116	27	1	AAGAAAAGAAAAGAAAAGaAAAAGAAA
VVO_S00010	CCTTCT	AAGGAG	9813	9834	22	0	CCTTCTCCTTCTCCTTCTCCTT
VVO_S00010	CACAGA	ACACAG	9976	9995	20	0	CACAGACACAGACACAGACA
VVO_S00010	AGCATT	AATGCT	11968	11985	18	0	AGCATTAGCATTAGCATT
VVO_S00010	TAGG	ACCT	73604	73621	18	0	TAGGTAGGTAGGTAGGTA
VVO_S00010	GAGAG	AGAGG	74131	74150	20	0	GAGAGGAGAGGAGAGGAGAG
VVO_S00010	AGACA	AAGAC	74408	74424	17	0	AGACAAGACAAGACAAG
VVO_S00010	ACATC	ATCAC	79132	79148	17	0	ACATCACATCACATCAC
VVO_S00010	CGAG	AGCG	80148	80163	16	0	CGAGCGAGCGAGCGAG
VVO_S00010	TCAA	AATC	81124	81139	16	0	TCAATCAATCAATCAA
VVO_S00010	GGAC	ACGG	84095	84111	17	0	GGACGGACGGACGGACG
VVO_S00010	CGAA	AACG	84645	84659	15	0	CGAACGAACGAACGA
VVO_S00010	GTTGTC	AACGAC	91695	91713	19	0	GTTGTCGTTGTCGTTGTCG
VVO_S00010	TTGGCG	AACGCC	103031	103053	23	0	TTGGCGTTGGCGTTGGCGTTGGC
VVO_S00010	GCGCA	AGCGC	107168	107182	15	0	GCGCAGCGCAGCGCA
VVO_S00010	GTG	ACC	117100	117114	15	0	GTGGTGGTGGTGGTG
VVO_S00010	CGCCA	ACGCC	120237	120252	16	0	CGCCACGCCACGCCAC
VVO_S00010	GGATG	ATCCC	120697	120717	21	0	GGATGGGATGGGATGGGATGG
VVO_S00010	CACAAC	AACCAC	126842	126863	22	0	CACAACCACAACCACAACCACA
VVO_S00010	CCCTCC	AGGGGG	128302	128319	18	0	CCCTCCCCCTCCCCCTCC
VVO_S00010	TCTTCG	AAGACG	162541	162571	31	0	TCTTCGTCTTCGTCTTCGTCTTCGTCTTCGT
VVO_S00010	CCA	ACC	181395	181411	17	0	CCACCACCACCACCACC
VVO_S00010	CATCTG	ATCTGC	196599	196617	19	0	CATCTGCATCTGCATCTGC
VVO_S00010	AAGCC	AAGCC	210138	210153	16	0	AAGCCAAGCCAAGCCA
VVO_S00010	AGATT	AATCT	217464	217479	16	0	AGATTAGATTAGATTA
VVO_S00010	AGCACG	ACGAGC	239651	239672	22	0	AGCACGAGCACGAGCACGAGCA
VVO_S00010	CTCCTG	AGCAGG	383243	383265	23	0	CTCCTGCTCCTGCTCCTGCTCCT
VVO_S00010	GCACAA	AAGCAC	419127	419158	32	0	GCACAAGCACAAGCACAAGCACAAGCACAAGC
VVO_S00010	GAC	ACG	423563	423579	17	0	GACGACGACGACGACGA
VVO_S00010	GCACCT	ACCTGC	432280	432301	22	0	GCACCTGCACCTGCACCTGCAC
VVO_S00010	TAGGCA	ATAGGC	441247	441264	18	0	TAGGCATAGGCATAGGCA
VVO_S00010	AAGTCG	AAGTCG	441414	441431	18	0	AAGTCGAAGTCGAAGTCG
VVO_S00010	AGTGGA	AAGTGG	446777	446794	18	0	AGTGGAAGTGGAAGTGGA
VVO_S00010	AATG	AATG	486595	486609	15	0	AATGAATGAATGAAT
VVO_S00010	TGTGT	AACAC	496376	496393	18	0	TGTGTTGTGTTGTGTTGT
VVO_S00010	AACCA	AAACC	509656	509670	15	0	AACCAAACCAAACCA
VVO_S00010	CTG	AGC	526444	526458	15	0	CTGCTGCTGCTGCTG
VVO_S00010	TTCAA	AATTC	581630	581646	17	0	TTCAATTCAATTCAATT
VVO_S00010	TATCA	ATATC	591275	591289	15	0	TATCATATCATATCA
VVO_S00010	AGCACC	ACCAGC	620258	620275	18	0	AGCACCAGCACCAGCACC
VVO_S00010	TTCCC	AAGGG	633815	633829	15	0	TTCCCTTCCCTTCCC
VVO_S00010	T	A	639569	639584	16	0	TTTTTTTTTTTTTTTT
VVO_S00010	GACTCG	ACTCGG	674218	674238	21	0	GACTCGGACTCGGACTCGGAC
VVO_S00010	ATCTTC	AAGATG	788902	788919	18	0	ATCTTCATCTTCATCTTC
VVO_S00010	ATTAGG	AATCCT	789868	789885	18	0	ATTAGGATTAGGATTAGG
VVO_S00010	AGAA	AAAG	791602	791619	18	0	AGAAAGAAAGAAAGAAAG
VVO_S00010	C	C	855572	855586	15	0	ccccccccccccccc
VVO_S00010	GGA	AGG	887066	887080	15	0	GGAGGAGGAGGAGGA
VVO_S00010	TAATC	AATCT	905036	905051	16	0	TAATCTAATCTAATCT
VVO_S00010	A	A	907836	907861	26	0	aaaaaaaaaaaaaaaaaaaaaaaaaa
VVO_S00011	CCA	ACC	433552	433585	34	3	CCACCACCACCACCATCATCACCACCATCACCAC
VVO_S00011	GGACGA	ACGAGG	140502	140526	25	1	GGACGAGGACGAGGACGAAGACGAG
VVO_S00011	TTTTC	AAAAG	217458	217485	28	1	TTTTCtTTTTCTTTTCTTTTCTTTTCTT
VVO_S00011	CTCAGG	AGCCTG	325760	325789	30	1	GGCTCAGACTCAGGCTCAGGCTCAGGCTCA
VVO_S00011	CACCTG	ACCTGC	395591	395621	31	1	CACCTGCACCTGCACCTGCGCCTGCACCTGC
VVO_S00011	CGTCCT	ACGAGG	416569	416596	28	1	CGTCCTCGTCCTCGTCCTCATCCTCGTC
VVO_S00011	CCA	ACC	687899	687919	21	1	CCACCACCAGCACCACCACCA
VVO_S00011	AAGAA	AAAAG	704573	704605	33	1	AAGAAAAGAAAAGAAAAAGAAAAGAAAAGAAAA
VVO_S00011	CTC	AGG	848972	848994	23	1	CCTCCTCTCCTCCTCCTCCTCCT
VVO_S00011	GCTGGT	ACCAGC	4790	4808	19	0	GCTGGTGCTGGTGCTGGTG
VVO_S00011	CCTTCT	AAGGAG	24729	24747	19	0	CCTTCTCCTTCTCCTTCTC
VVO_S00011	GCCT	AGGC	44321	44335	15	0	GCCTGCCTGCCTGCC
VVO_S00011	CA	AC	53757	53772	16	0	CACACACACACACACA
VVO_S00011	TGG	ACC	75018	75033	16	0	TGGTGGTGGTGGTGGT
VVO_S00011	AGGG	AGGG	77196	77217	22	0	AGGGAGGGAGGGAGGGAGGGAG
VVO_S00011	AGCACC	ACCAGC	88909	88927	19	0	AGCACCAGCACCAGCACCA
VVO_S00011	T	A	110123	110153	31	0	ttttttttttttttttttttttttttttttt
VVO_S00011	TCG	ACG	125499	125514	16	0	TCGTCGTCGTCGTCGT
VVO_S00011	TGCTGG	ACCAGC	139461	139491	31	0	TGCTGGTGCTGGTGCTGGTGCTGGTGCTGGT
VVO_S00011	GAC	ACG	140485	140499	15	0	GACGACGACGACGAC
VVO_S00011	GCCCAT	ATGCCC	140631	140651	21	0	GCCCATGCCCATGCCCATGCC
VVO_S00011	GCG	CCG	140750	140765	16	0	GCGGCGGCGGCGGCGG
VVO_S00011	TCTCCT	AAGGAG	142189	142206	18	0	TCTCCTTCTCCTTCTCCT
VVO_S00011	AGAGAA	AAAGAG	145228	145245	18	0	AGAGAAAGAGAAAGAGAA
VVO_S00011	CGA	ACG	146082	146096	15	0	CGACGACGACGACGA
VVO_S00011	CGCCCA	ACGCCC	165230	165254	25	0	CGCCCACGCCCACGCCCACGCCCAC
VVO_S00011	ATCCCA	AATCCC	185959	185979	21	0	ATCCCAATCCCAATCCCAATC
VVO_S00011	GCAA	AAGC	207998	208014	17	0	GCAAGCAAGCAAGCAAG
VVO_S00011	TCG	ACG	213140	213157	18	0	TCGTCGTCGTCGTCGTCG
VVO_S00011	TTTTG	AAAAC	213818	213832	15	0	TTTTGTTTTGTTTTG
VVO_S00011	AGATC	ATCAG	218123	218137	15	0	AGATCAGATCAGATC
VVO_S00011	ACTGTA	AACTGT	220378	220396	19	0	ACTGTAACTGTAACTGTAA
VVO_S00011	TCGTCC	ACGAGG	256507	256526	20	0	TCGTCCTCGTCCTCGTCCTC
VVO_S00011	CTTGCA	AAGTGC	259523	259548	26	0	CTTGCACTTGCACTTGCACTTGCACT
VVO_S00011	GGGCG	CCCCG	289293	289307	15	0	GGGCGGGGCGGGGCG
VVO_S00011	ACGAGA	AACGAG	389834	389861	28	0	ACGAGAACGAGAACGAGAACGAGAACGA
VVO_S00011	TCTGGC	AGAGCC	390804	390824	21	0	TCTGGCTCTGGCTCTGGCTCT
VVO_S00011	GAC	ACG	432812	432827	16	0	GACGACGACGACGACG
VVO_S00011	GCT	AGC	433334	433348	15	0	GCTGCTGCTGCTGCT
VVO_S00011	CCGCAC	ACCCGC	433434	433470	37	0	CCGCACCCGCACCCGCACCCGCACCCGCACCCGCACC
VVO_S00011	GACGC	ACGCG	467556	467571	16	0	GACGCGACGCGACGCG
VVO_S00011	TCTGCG	ACGCAG	529963	529982	20	0	TCTGCGTCTGCGTCTGCGTC
VVO_S00011	GACTCG	ACTCGG	537091	537117	27	0	GACTCGGACTCGGACTCGGACTCGGAC
VVO_S00011	GGCGTT	AACGCC	558489	558507	19	0	GGCGTTGGCGTTGGCGTTG
VVO_S00011	CTTTT	AAAAG	591072	591089	18	0	CTTTTCTTTTCTTTTCTT
VVO_S00011	CAG	AGC	591568	591584	17	0	CAGCAGCAGCAGCAGCA
VVO_S00011	GGACAA	AAGGAC	592981	592999	19	0	GGACAAGGACAAGGACAAG
VVO_S00011	TTCTT	AAAAG	595631	595651	21	0	TTCTTTTCTTTTCTTTTCTTT
VVO_S00011	CGCCCG	CCCGCG	608260	608278	19	0	CGCCCGCGCCCGCGCCCGC
VVO_S00011	GGT	ACC	608487	608502	16	0	GGTGGTGGTGGTGGTG
VVO_S00011	AGAGGG	AGAGGG	612294	612316	23	0	AGAGGGAGAGGGAGAGGGAGAGG
VVO_S00011	CATCGC	ATCGCC	612732	612754	23	0	CATCGCCATCGCCATCGCCATCG
VVO_S00011	AAACGC	AAACGC	617157	617177	21	0	AAACGCAAACGCAAACGCAAA
VVO_S00011	CAC	ACC	643378	643393	16	0	CACCACCACCACCACC
VVO_S00011	CTCTTC	AAGAGG	657577	657594	18	0	CTCTTCCTCTTCCTCTTC
VVO_S00011	TAATC	AATCT	704521	704536	16	0	TAATCTAATCTAATCT
VVO_S00011	GTG	ACC	717074	717088	15	0	GTGGTGGTGGTGGTG
VVO_S00011	CAC	ACC	729466	729482	17	0	CACCACCACCACCACCA
VVO_S00011	CGACCA	ACCACG	760789	760811	23	0	CGACCACGACCACGACCACGACC
VVO_S00011	TCG	ACG	765375	765390	16	0	TCGTCGTCGTCGTCGT
VVO_S00011	TGTCAA	AATGTC	835603	835620	18	0	TGTCAATGTCAATGTCAA
VVO_S00011	TCCTC	AGAGG	851486	851508	23	0	TCCTCTCCTCTCCTCTCCTCTCC
VVO_S00012	CCA	ACC	102949	102995	47	4	CCACCACCACCACCTCCACCACCATCACCTCCACCACCTCCACCACC
VVO_S00012	GAGTGC	ACTCGC	784704	784750	47	2	GAGTGCGAGTGCGAGTGCGAGTGCGAGTGCGAGTGGGGGTGCGAGTG
VVO_S00012	GGAG	AGGG	417994	418015	22	1	AGGGAGGGAGGAGGGAGGGAGG
VVO_S00012	GATGCC	ATCGGC	477376	477400	25	1	CGATGCTGATGCCGATGCCGATGCC
VVO_S00012	CTCTCC	AGAGGG	9151	9168	18	0	CTCTCCCTCTCCCTCTCC
VVO_S00012	AGGACG	ACGAGG	9717	9739	23	0	AGGACGAGGACGAGGACGAGGAC
VVO_S00012	TAA	AAT	134553	134581	29	0	TAATAATAATAATAATAATAATAATAATA
VVO_S00012	AAAGG	AAAGG	134584	134602	19	0	AAAGGAAAGGAAAGGAAAG
VVO_S00012	GCATCC	ATCCGC	167074	167092	19	0	GCATCCGCATCCGCATCCG
VVO_S00012	GGCAT	ATGCC	186778	186792	15	0	GGCATGGCATGGCAT
VVO_S00012	GGGATT	AATCCC	187804	187829	26	0	GGGATTGGGATTGGGATTGGGATTGG
VVO_S00012	TCCCAT	AATGGG	248638	248656	19	0	TCCCATTCCCATTCCCATT
VVO_S00012	GTGCTT	AAGCAC	249930	249964	35	0	GTGCTTGTGCTTGTGCTTGTGCTTGTGCTTGTGCT
VVO_S00012	ATGGC	ATGCC	254119	254134	16	0	ATGGCATGGCATGGCA
VVO_S00012	TATCG	ATACG	262223	262237	15	0	TATCGTATCGTATCG
VVO_S00012	GTTCAT	AACATG	263925	263943	19	0	GTTCATGTTCATGTTCATG
VVO_S00012	GAC	ACG	274397	274411	15	0	GACGACGACGACGAC
VVO_S00012	CCA	ACC	275004	275018	15	0	CCACCACCACCACCA
VVO_S00012	CGT	ACG	279272	279287	16	0	CGTCGTCGTCGTCGTC
VVO_S00012	TGC	AGC	285163	285177	15	0	TGCTGCTGCTGCTGC
VVO_S00012	GCC	CCG	312287	312302	16	0	GCCGCCGCCGCCGCCG
VVO_S00012	AGC	AGC	378530	378549	20	0	AGCAGCAGCAGCAGCAGCAG
VVO_S00012	TGC	AGC	403860	403874	15	0	TGCTGCTGCTGCTGC
VVO_S00012	TGGTTG	AACCAC	415136	415154	19	0	TGGTTGTGGTTGTGGTTGT
VVO_S00012	AGGAGC	AGCAGG	420315	420333	19	0	AGGAGCAGGAGCAGGAGCA
VVO_S00012	ATACC	ATACC	452759	452774	16	0	ATACCATACCATACCA
VVO_S00012	CGTGTC	ACACGG	475220	475243	24	0	CGTGTCCGTGTCCGTGTCCGTGTC
VVO_S00012	GTGTCG	ACACCG	524884	524904	21	0	GTGTCGGTGTCGGTGTCGGTG
VVO_S00012	CGTTGG	AACGCC	525423	525441	19	0	CGTTGGCGTTGGCGTTGGC
VVO_S00012	AAGAA	AAAAG	540505	540521	17	0	AAGAAAAGAAAAGAAAA
VVO_S00012	CTGGTG	ACCAGC	543901	543925	25	0	CTGGTGCTGGTGCTGGTGCTGGTGC
VVO_S00012	GGATGC	ATCCGC	545941	545958	18	0	GGATGCGGATGCGGATGC
VVO_S00012	CCTCT	AGAGG	633069	633084	16	0	CCTCTCCTCTCCTCTC
VVO_S00012	GCT	AGC	676341	676355	15	0	GCTGCTGCTGCTGCT
VVO_S00012	GTGCTG	ACCAGC	676505	676523	19	0	GTGCTGGTGCTGGTGCTGG
VVO_S00012	GGGGC	CCCCG	678574	678588	15	0	GGGGCGGGGCGGGGC
VVO_S00012	TCAAA	AAATC	687828	687843	16	0	TCAAATCAAATCAAAT
VVO_S00012	GCTCGA	AGCTCG	715931	715948	18	0	GCTCGAGCTCGAGCTCGA
VVO_S00012	TCTCG	ACGAG	727897	727912	16	0	TCTCGTCTCGTCTCGT
VVO_S00012	GTTGT	AACAC	741703	741718	16	0	GTTGTGTTGTGTTGTG
VVO_S00012	CCCATC	ATCCCC	758251	758269	19	0	CCCATCCCCATCCCCATCC
VVO_S00012	TCCCA	ATCCC	758272	758289	18	0	TCCCATCCCATCCCATCC
VVO_S00012	TCTCG	ACGAG	769389	769405	17	0	TCTCGTCTCGTCTCGTC
VVO_S00012	CCGGCA	ACCGGC	773080	773099	20	0	CCGGCACCGGCACCGGCACC
VVO_S00012	CGA	ACG	785356	785370	15	0	CGACGACGACGACGA
VVO_S00012	AGC	AGC	786642	786658	17	0	AGCAGCAGCAGCAGCAG
VVO_S00012	TGCGTT	AAACGC	830267	830287	21	0	TGCGTTTGCGTTTGCGTTTGC
VVO_S00013	CAG	AGC	792834	792885	52	5	CAGCAGCAGCAGCAACAACAACAGCAGCAaCAACAGCAGCAGCAGCAGCAGC
VVO_S00013	TG	AC	833349	833386	38	3	TGTGTGTGTGCGTGTGTGCGTGTGTGCGTGTGTGTGTG
VVO_S00013	GAG	AGG	182010	182038	29	2	GAGGAGGAGGACGAGGAGGACGAGGAGGA
VVO_S00013	TGG	ACC	253931	253953	23	1	TGGTGGTGGTGGTGTGGTGGTGG
VVO_S00013	AAAATA	AAAAAT	321216	321241	26	1	AAAAATAAAATAAAAATAAAAATAAA
VVO_S00013	ACTTCT	AAGTAG	517022	517062	41	1	ACTTCTACTTCTACTTCTACTTCTACCTCTACTTCTACTTC
VVO_S00013	TTCTCT	AAAGAG	653016	653043	28	1	TTCTCTTTCTCTTTCTCTTTCTTTTTCT
VVO_S00013	TCGTAT	AATACG	655491	655522	32	1	TCGTACTCGTATTCGTATTCGTATTCGTATTC
VVO_S00013	CATTT	AAATG	34527	34541	15	0	CATTTCATTTCATTT
VVO_S00013	GAACA	AACAG	59968	59985	18	0	GAACAGAACAGAACAGAA
VVO_S00013	TCTTCA	AAGATG	72538	72557	20	0	TCTTCATCTTCATCTTCATC
VVO_S00013	GCA	AGC	72559	72573	15	0	GCAGCAGCAGCAGCA
VVO_S00013	GCACCT	ACCTGC	88746	88771	26	0	GCACCTGCACCTGCACCTGCACCTGC
VVO_S00013	GGAAAT	AAATGG	94897	94914	18	0	GGAAATGGAAATGGAAAT
VVO_S00013	TCATGC	ATGAGC	97228	97249	22	0	TCATGCTCATGCTCATGCTCAT
VVO_S00013	ATTGT	AATAC	102106	102120	15	0	ATTGTATTGTATTGT
VVO_S00013	GAG	AGG	114397	114411	15	0	GAGGAGGAGGAGGAG
VVO_S00013	CCGG	CCGG	157743	157763	21	0	CCGGCCGGCCGGCCGGCCGGC
VVO_S00013	ACCAA	AAACC	183519	183533	15	0	ACCAAACCAAACCAA
VVO_S00013	AGG	AGG	208706	208721	16	0	AGGAGGAGGAGGAGGA
VVO_S00013	GCACCA	ACCAGC	272710	272728	19	0	GCACCAGCACCAGCACCAG
VVO_S00013	A	A	276214	276234	21	0	aaaaaaaaaaaaaaaaaaaaa
VVO_S00013	GGTGAG	ACCCTC	297828	297845	18	0	GGTGAGGGTGAGGGTGAG
VVO_S00013	ATC	ATC	303819	303837	19	0	ATCATCATCATCATCATCA
VVO_S00013	TTTAAT	AAAATT	308439	308458	20	0	TTTAATTTTAATTTTAATTT
VVO_S00013	TAATC	AATCT	309371	309386	16	0	TAATCTAATCTAATCT
VVO_S00013	CACCAT	ATCACC	377241	377259	19	0	CACCATCACCATCACCATC
VVO_S00013	CCTCT	AGAGG	382509	382523	15	0	CCTCTCCTCTCCTCT
VVO_S00013	GGT	ACC	428346	428361	16	0	GGTGGTGGTGGTGGTG
VVO_S00013	GGGTAT	ATACCC	428379	428400	22	0	GGGTATGGGTATGGGTATGGGT
VVO_S00013	TGAGGT	AACCTC	430490	430508	19	0	TGAGGTTGAGGTTGAGGTT
VVO_S00013	AAGA	AAAG	433480	433499	20	0	AAGAAAGAAAGAAAGAAAGA
VVO_S00013	GCTCCT	AGCAGG	433693	433714	22	0	GCTCCTGCTCCTGCTCCTGCTC
VVO_S00013	ACCA	AACC	564503	564517	15	0	ACCAACCAACCAACC
VVO_S00013	GATTA	AATCT	573966	573985	20	0	GATTAGATTAGATTAGATTA
VVO_S00013	TTTCTT	AAAAAG	580895	580914	20	0	TTTCTTTTTCTTTTTCTTTT
VVO_S00013	AGATT	AATCT	580954	580969	16	0	AGATTAGATTAGATTA
VVO_S00013	ATAC	ATAC	594323	594338	16	0	ATACATACATACATAC
VVO_S00013	CAGCTC	AGCTCC	602081	602099	19	0	CAGCTCCAGCTCCAGCTCC
VVO_S00013	TTATC	AAGAT	612465	612479	15	0	TTATCTTATCTTATC
VVO_S00013	CAC	ACC	619744	619759	16	0	CACCACCACCACCACC
VVO_S00013	AAGCC	AAGCC	625261	625276	16	0	AAGCCAAGCCAAGCCA
VVO_S00013	AT	AT	638518	638534	17	0	ATATATATATATATATA
VVO_S00013	TTTTC	AAAAG	687861	687887	27	0	TTTTCTTTTCTTTTCTTTTCTTTTCTT
VVO_S00013	AGATT	AATCT	691809	691824	16	0	AGATTAGATTAGATTA
VVO_S00013	ATTTTC	AAAATG	694050	694069	20	0	ATTTTCATTTTCATTTTCAT
VVO_S00013	TTTGT	AAAAC	706710	706724	15	0	TTTGTTTTGTTTTGT
VVO_S00013	GAT	ATC	792282	792297	16	0	GATGATGATGATGATG
VVO_S00013	CAG	AGC	792483	792503	21	0	CAGCAGCAGCAGCAGCAGCAG
VVO_S00013	AT	AT	801543	801564	22	0	ATATATATATATATATATATAT
VVO_S00013	GTCCTC	ACGAGG	826003	826020	18	0	GTCCTCGTCCTCGTCCTC
VVO_S00014	CGT	ACG	346256	346286	31	2	CGTCGTCGTCGTCATCGTCGTCGTCATCGTC
VVO_S00014	CTCTGA	ACTCTG	32421	32449	29	1	CTCTGACTCTGACTCTGACTCTGGCTCTG
VVO_S00014	GTG	ACC	45258	45287	30	1	GTGGTGGTGGTGGTGGTGGTGATGGTGGTG
VVO_S00014	GTG	ACC	224191	224211	21	1	GTGGTGGTGGTGATGGTGGTG
VVO_S00014	TGCCTA	ATAGGC	683425	683450	26	1	ATGCCTGTGCCTATGCCTATGCCTAT
VVO_S00014	AAAATA	AAAAAT	758592	758618	27	1	AAAATAAAAATAAAAATAAATAATAAA
VVO_S00014	CGTA	ACGT	36385	36400	16	0	CGTACGTACGTACGTA
VVO_S00014	TTTTC	AAAAG	63003	63020	18	0	TTTTCTTTTCTTTTCTTT
VVO_S00014	CCCACC	ACCCCC	134598	134615	18	0	CCCACCCCCACCCCCACC
VVO_S00014	CCA	ACC	151178	151192	15	0	CCACCACCACCACCA
VVO_S00014	GGGAA	AAGGG	164473	164487	15	0	GGGAAGGGAAGGGAA
VVO_S00014	TCAGAG	ACTCTG	214866	214885	20	0	TCAGAGTCAGAGTCAGAGTC
VVO_S00014	TA	AT	221620	221634	15	0	TATATATATATATAT
VVO_S00014	TGG	ACC	224379	224393	15	0	TGGTGGTGGTGGTGG
VVO_S00014	TCCCC	AGGGG	256143	256157	15	0	TCCCCTCCCCTCCCC
VVO_S00014	TTGAA	AATTC	260226	260248	23	0	TTGAATTGAATTGAATTGAATTG
VVO_S00014	AAGAA	AAAAG	281411	281426	16	0	AAGAAAAGAAAAGAAA
VVO_S00014	ACGGAC	ACACGG	287836	287854	19	0	ACGGACACGGACACGGACA
VVO_S00014	CAAGGG	AAGGGC	287988	288010	23	0	CAAGGGCAAGGGCAAGGGCAAGG
VVO_S00014	CCAACA	AACACC	353638	353656	19	0	CCAACACCAACACCAACAC
VVO_S00014	CTCCC	AGGGG	360197	360211	15	0	CTCCCCTCCCCTCCC
VVO_S00014	ACAGCA	AACAGC	402929	402946	18	0	ACAGCAACAGCAACAGCA
VVO_S00014	GGA	AGG	415036	415050	15	0	GGAGGAGGAGGAGGA
VVO_S00014	GTGCCC	ACGGGC	415186	415203	18	0	GTGCCCGTGCCCGTGCCC
VVO_S00014	GCAAAT	AAATGC	416965	416983	19	0	GCAAATGCAAATGCAAATG
VVO_S00014	CCTTCC	AAGGGG	453483	453501	19	0	CCTTCCCCTTCCCCTTCCC
VVO_S00014	CGACAT	ATCGAC	550809	550827	19	0	CGACATCGACATCGACATC
VVO_S00014	GT	AC	562610	562625	16	0	GTGTGTGTGTGTGTGT
VVO_S00014	GCC	CCG	565568	565583	16	0	GCCGCCGCCGCCGCCG
VVO_S00014	CTCGCC	AGGGCG	566614	566634	21	0	CTCGCCCTCGCCCTCGCCCTC
VVO_S00014	CAATGC	AATGCC	568168	568187	20	0	CAATGCCAATGCCAATGCCA
VVO_S00014	TTTTG	AAAAC	568521	568537	17	0	TTTTGTTTTGTTTTGTT
VVO_S00014	CAGGCT	AGCCTG	569521	569538	18	0	CAGGCTCAGGCTCAGGCT
VVO_S00014	GGGCTT	AAGCCC	597060	597085	26	0	GGGCTTGGGCTTGGGCTTGGGCTTGG
VVO_S00014	CCACCG	ACCGCC	616450	616473	24	0	CCACCGCCACCGCCACCGCCACCG
VVO_S00014	TACGA	ATACG	653497	653511	15	0	TACGATACGATACGA
VVO_S00014	CTCCTG	AGCAGG	679450	679468	19	0	CTCCTGCTCCTGCTCCTGC
VVO_S00014	GCCAGT	ACTGGC	682977	683001	25	0	GCCAGTGCCAGTGCCAGTGCCAGTG
VVO_S00014	GGACGA	ACGAGG	788119	788136	18	0	GGACGAGGACGAGGACGA
VVO_S00015	GAG	AGG	675580	675611	32	3	GAGGAGGAAGGAGAGGAGGAGGATGAGGAGGA
VVO_S00015	CAC	ACC	112121	112148	28	2	CACCACCACCACACCACTACCACCACCA
VVO_S00015	TCC	AGG	84169	84206	38	1	TCCTCTTCCTCCTCCTCCTCCTCCTCCTCCTCCTCCTC
VVO_S00015	CAC	ACC	112428	112475	48	1	CCACCACACCACCACCACCACCACCACCACCACCACCACCACCACCAC
VVO_S00015	TCCTT	AAAGG	562729	562749	21	1	TCCTTCTCCTTTCCTTTCCTT
VVO_S00015	AAGA	AAAG	623293	623312	20	1	AAAGAAAGAAGAAAGAAAGA
VVO_S00015	GAGCCC	AGCCCG	10847	10865	19	0	GAGCCCGAGCCCGAGCCCG
VVO_S00015	TGA	ATC	12087	12109	23	0	TGATGATGATGATGATGATGATG
VVO_S00015	CCAGCA	ACCAGC	12942	12959	18	0	CCAGCACCAGCACCAGCA
VVO_S00015	GGTGCA	ACCTGC	14110	14128	19	0	GGTGCAGGTGCAGGTGCAG
VVO_S00015	CTGGTG	ACCAGC	14349	14366	18	0	CTGGTGCTGGTGCTGGTG
VVO_S00015	GGAAA	AAAGG	31862	31876	15	0	GGAAAGGAAAGGAAA
VVO_S00015	CGACCA	ACCACG	33413	33431	19	0	CGACCACGACCACGACCAC
VVO_S00015	TTATC	AAGAT	113361	113375	15	0	TTATCTTATCTTATC
VVO_S00015	CAG	AGC	123797	123811	15	0	CAGCAGCAGCAGCAG
VVO_S00015	GGGCAC	ACGGGC	137472	137490	19	0	GGGCACGGGCACGGGCACG
VVO_S00015	TCTCCA	ATCTCC	153535	153554	20	0	TCTCCATCTCCATCTCCATC
VVO_S00015	CCGCGT	ACGCGG	164433	164450	18	0	CCGCGTCCGCGTCCGCGT
VVO_S00015	TAATC	AATCT	172738	172753	16	0	TAATCTAATCTAATCT
VVO_S00015	AAATG	AAATG	172793	172810	18	0	AAATGAAATGAAATGAAA
VVO_S00015	AAT	AAT	176705	176724	20	0	AATAATAATAATAATAATAA
VVO_S00015	ATTTTC	AAAATG	182185	182206	22	0	ATTTTCATTTTCATTTTCATTT
VVO_S00015	GTCATC	ATCGTC	197002	197021	20	0	GTCATCGTCATCGTCATCGT
VVO_S00015	AAATGA	AAAATG	220765	220782	18	0	AAATGAAAATGAAAATGA
VVO_S00015	GTTTT	AAAAC	225614	225628	15	0	GTTTTGTTTTGTTTT
VVO_S00015	GGTA	ACCT	229246	229260	15	0	GGTAGGTAGGTAGGT
VVO_S00015	TTTTCC	AAAAGG	239266	239289	24	0	TTTTCCTTTTCCTTTTCCTTTTCC
VVO_S00015	GATAA	AAGAT	241847	241861	15	0	GATAAGATAAGATAA
VVO_S00015	TGCCT	AAGGC	272056	272070	15	0	TGCCTTGCCTTGCCT
VVO_S00015	TGG	ACC	318680	318696	17	0	TGGTGGTGGTGGTGGTG
VVO_S00015	AGACT	ACTAG	326104	326118	15	0	AGACTAGACTAGACT
VVO_S00015	ACCCGC	ACCCGC	340463	340484	22	0	ACCCGCACCCGCACCCGCACCC
VVO_S00015	TGCCAC	ACTGCC	341449	341466	18	0	TGCCACTGCCACTGCCAC
VVO_S00015	TGTA	ATAC	385138	385153	16	0	TGTATGTATGTATGTA
VVO_S00015	CGTCG	ACGCG	424226	424240	15	0	CGTCGCGTCGCGTCG
VVO_S00015	TCC	AGG	447093	447107	15	0	TCCTCCTCCTCCTCC
VVO_S00015	CCTCGT	ACGAGG	490655	490675	21	0	CCTCGTCCTCGTCCTCGTCCT
VVO_S00015	GACGAG	ACGAGG	505764	505783	20	0	GACGAGGACGAGGACGAGGA
VVO_S00015	GAT	ATC	590256	590272	17	0	GATGATGATGATGATGA
VVO_S00015	AAGAA	AAAAG	625390	625406	17	0	AAGAAAAGAAAAGAAAA
VVO_S00015	TTTTC	AAAAG	631004	631030	27	0	TTTTCTTTTCTTTTCTTTTCTTTTCTT
VVO_S00015	AGATT	AATCT	631067	631082	16	0	AGATTAGATTAGATTA
VVO_S00015	CCTATG	ATAGGC	665628	665645	18	0	CCTATGCCTATGCCTATG
VVO_S00015	CCAGCA	ACCAGC	676514	676531	18	0	CCAGCACCAGCACCAGCA
VVO_S00015	CTCAGC	AGCCTC	710601	710621	21	0	CTCAGCCTCAGCCTCAGCCTC
VVO_S00015	ATGC	ATGC	717519	717536	18	0	ATGCATGCATGCATGCAT
VVO_S00015	CAC	ACC	719184	719207	24	0	CACCACCACCACCACCACCACCAC
VVO_S00015	GACCTC	ACCTCG	719752	719774	23	0	GACCTCGACCTCGACCTCGACCT
VVO_S00015	CGCACT	ACTCGC	725324	725342	19	0	CGCACTCGCACTCGCACTC
VVO_S00015	GTTGAC	AACGTC	725632	725649	18	0	GTTGACGTTGACGTTGAC
VVO_S00015	GCT	AGC	739332	739347	16	0	GCTGCTGCTGCTGCTG
VVO_S00016	TGG	ACC	16106	16134	29	2	TGGTGGTGGTGGTGGTAGTGATGGTGGTG
VVO_S00016	AAAATA	AAAAAT	311667	311701	35	2	aAAAATAAAATaAAAATaAAAATaAAAATAAAAAT
VVO_S00016	GAC	ACG	7716	7740	25	1	GACGACGACGATGACGACGACGACG
VVO_S00016	CCA	ACC	9747	9771	25	1	CCACCACCACCACTACCACCACCAC
VVO_S00016	TATT	AAAT	270841	270861	21	1	TATTTATTTATTTTATTTATT
VVO_S00016	TGGA	ATCC	664177	664200	24	1	TGGATGGATGGCTGGATGGATGGA
VVO_S00016	GAG	AGG	700662	700684	23	1	GAGGAGGAGGATGAGGAGGAGGA
VVO_S00016	CACG	ACGC	3389	3405	17	0	CACGCACGCACGCACGC
VVO_S00016	GGCTCC	AGCCGG	8049	8071	23	0	GGCTCCGGCTCCGGCTCCGGCTC
VVO_S00016	TAG	ACT	15654	15672	19	0	TAGTAGTAGTAGTAGTAGT
VVO_S00016	ATGGTG	ATCACC	16316	16333	18	0	ATGGTGATGGTGATGGTG
VVO_S00016	GTG	ACC	16657	16671	15	0	GTGGTGGTGGTGGTG
VVO_S00016	GTG	ACC	24469	24497	29	0	GTGGTGGTGGTGGTGGTGGTGGTGGTGGT
VVO_S00016	GTCAAG	AAGGTC	36993	37018	26	0	GTCAAGGTCAAGGTCAAGGTCAAGGT
VVO_S00016	AG	AG	82161	82183	23	0	AGAGAGAGAGAGAGAGAGAGAGA
VVO_S00016	GTTCTG	AACCAG	224142	224172	31	0	GTTCTGGTTCTGGTTCTGGTTCTGGTTCTGG
VVO_S00016	TTCTGG	AACCAG	245767	245787	21	0	TTCTGGTTCTGGTTCTGGTTC
VVO_S00016	TGG	ACC	251230	251244	15	0	TGGTGGTGGTGGTGG
VVO_S00016	GGT	ACC	253793	253812	20	0	GGTGGTGGTGGTGGTGGTGG
VVO_S00016	GGT	ACC	253859	253881	23	0	GGTGGTGGTGGTGGTGGTGGTGG
VVO_S00016	GATACT	ATACTG	327971	327989	19	0	GATACTGATACTGATACTG
VVO_S00016	CTC	AGG	336892	336906	15	0	CTCCTCCTCCTCCTC
VVO_S00016	CAGCAA	AACAGC	337881	337899	19	0	CAGCAACAGCAACAGCAAC
VVO_S00016	ATTGTT	AATAAC	418211	418228	18	0	ATTGTTATTGTTATTGTT
VVO_S00016	ATAGG	ATAGG	428772	428787	16	0	ATAGGATAGGATAGGA
VVO_S00016	CACAC	ACACC	447967	447981	15	0	CACACCACACCACAC
VVO_S00016	GCATT	AATGC	455822	455836	15	0	GCATTGCATTGCATT
VVO_S00016	CACAG	ACAGC	485047	485065	19	0	CACAGCACAGCACAGCACA
VVO_S00016	T	A	692507	692528	22	0	tttttttttttttttttttttt
VVO_S00016	GGC	CCG	712414	712430	17	0	GGCGGCGGCGGCGGCGG
VVO_S00016	AAG	AAG	721355	721378	24	0	AAGAAGAAGAAGAAGAAGAAGAAG
VVO_S00017	CTGCTC	AGCAGG	72283	72307	25	1	CTGCTCCTGCTCCTGCTCTTGCTCC
VVO_S00017	GCA	AGC	169091	169113	23	1	GCAGCAGCAGCAGAAGCAGCAGC
VVO_S00017	CAC	ACC	208271	208298	28	1	CACCACCACCACCATCACCACCACCACC
VVO_S00017	AGAGA	AAGAG	209181	209202	22	1	AGAAGAGAGAGAAGAGAAGAGA
VVO_S00017	TGG	ACC	672655	672681	27	1	GTGGTGATGGTGGTGGTGGTGGTGGTG
VVO_S00017	TTTC	AAAG	16136	16150	15	0	TTTCTTTCTTTCTTT
VVO_S00017	GTC	ACG	32071	32086	16	0	GTCGTCGTCGTCGTCG
VVO_S00017	AGGGA	AAGGG	36349	36377	29	0	AGGGAAGGGAAGGGAAGGGAAGGGAAGGG
VVO_S00017	ACTGAT	ATACTG	36505	36522	18	0	ACTGATACTGATACTGAT
VVO_S00017	GCT	AGC	43578	43595	18	0	GCTGCTGCTGCTGCTGCT
VVO_S00017	TCCGAT	AATCGG	72739	72759	21	0	TCCGATTCCGATTCCGATTCC
VVO_S00017	GGA	AGG	80019	80035	17	0	GGAGGAGGAGGAGGAGG
VVO_S00017	CAT	ATC	80997	81012	16	0	CATCATCATCATCATC
VVO_S00017	GTTCAC	AACGTG	156367	156385	19	0	GTTCACGTTCACGTTCACG
VVO_S00017	CTCGGA	ACTCGG	156517	156539	23	0	CTCGGACTCGGACTCGGACTCGG
VVO_S00017	AGGGA	AAGGG	156542	156558	17	0	AGGGAAGGGAAGGGAAG
VVO_S00017	TTGAT	AAATC	157184	157200	17	0	TTGATTTGATTTGATTT
VVO_S00017	CTGCC	AGGGC	177894	177909	16	0	CTGCCCTGCCCTGCCC
VVO_S00017	GGGCT	AGCCC	206019	206034	16	0	GGGCTGGGCTGGGCTG
VVO_S00017	GCGTGT	ACACGC	207008	207026	19	0	GCGTGTGCGTGTGCGTGTG
VVO_S00017	GATATG	ATATCC	209922	209947	26	0	GATATGGATATGGATATGGATATGGA
VVO_S00017	CGTG	ACGC	210049	210063	15	0	CGTGCGTGCGTGCGT
VVO_S00017	GGTGGA	ACCTCC	210249	210267	19	0	GGTGGAGGTGGAGGTGGAG
VVO_S00017	GACAA	AAGAC	210430	210444	15	0	GACAAGACAAGACAA
VVO_S00017	TTATG	AACAT	213874	213889	16	0	TTATGTTATGTTATGT
VVO_S00017	GATAA	AAGAT	235743	235757	15	0	GATAAGATAAGATAA
VVO_S00017	GAGAAG	AAGGAG	244633	244651	19	0	GAGAAGGAGAAGGAGAAGG
VVO_S00017	GCA	AGC	254979	254997	19	0	GCAGCAGCAGCAGCAGCAG
VVO_S00017	AGATT	AATCT	277756	277771	16	0	AGATTAGATTAGATTA
VVO_S00017	TTTTC	AAAAG	278687	278701	15	0	TTTTCTTTTCTTTTC
VVO_S00017	AGATT	AATCT	278740	278755	16	0	AGATTAGATTAGATTA
VVO_S00017	ATAAG	AAGAT	280183	280202	20	0	ATAAGATAAGATAAGATAAG
VVO_S00017	AAGAT	AAGAT	282767	282781	15	0	AAGATAAGATAAGAT
VVO_S00017	AGATA	AAGAT	286580	286595	16	0	AGATAAGATAAGATAA
VVO_S00017	CTCC	AGGG	297953	297968	16	0	CTCCCTCCCTCCCTCC
VVO_S00017	ATCGCA	AATCGC	311977	311995	19	0	ATCGCAATCGCAATCGCAA
VVO_S00017	TCG	ACG	314073	314090	18	0	TCGTCGTCGTCGTCGTCG
VVO_S00017	TCCCT	AAGGG	316061	316075	15	0	TCCCTTCCCTTCCCT
VVO_S00017	AGATT	AATCT	318701	318716	16	0	AGATTAGATTAGATTA
VVO_S00017	TTATC	AAGAT	324830	324845	16	0	TTATCTTATCTTATCT
VVO_S00017	ACACCT	ACACCT	358426	358445	20	0	ACACCTACACCTACACCTAC
VVO_S00017	TCTTA	AAGAT	358718	358734	17	0	TCTTATCTTATCTTATC
VVO_S00017	TGA	ATC	400657	400672	16	0	TGATGATGATGATGAT
VVO_S00017	CCGCG	CCGCG	402041	402056	16	0	CCGCGCCGCGCCGCGC
VVO_S00017	GAAG	AAGG	405855	405872	18	0	GAAGGAAGGAAGGAAGGA
VVO_S00017	CAG	AGC	516424	516438	15	0	CAGCAGCAGCAGCAG
VVO_S00017	GAGAGG	AGAGGG	516598	516615	18	0	GAGAGGGAGAGGGAGAGG
VVO_S00017	TGCTG	ACAGC	553600	553615	16	0	TGCTGTGCTGTGCTGT
VVO_S00017	CTGAG	AGCTC	569012	569026	15	0	CTGAGCTGAGCTGAG
VVO_S00017	T	A	615284	615299	16	0	TTTTTTTTTTTTTTTT
VVO_S00017	CAAG	AAGC	632876	632892	17	0	CAAGCAAGCAAGCAAGC
VVO_S00017	TCTCCT	AAGGAG	656625	656643	19	0	TCTCCTTCTCCTTCTCCTT
VVO_S00017	AAGAAA	AAAAAG	729778	729796	19	0	AAGAAAAAGAAAAAGAAAA
VVO_S00018	AAAATA	AAAAAT	102834	102888	55	4	AAAATAAAAATaAAAATAAAAATaAAAATAAAAATAAAAATAAAATAAAATAAAA
VVO_S00018	TGG	ACC	663583	663610	28	2	TGGTGGTGGTGGTGATGTGGTGGTGGTG
VVO_S00018	CTTCTC	AAGGAG	10102	10136	35	1	CTTCTCCTTCTCCTTCTCCTTCTCCTCCTCCTTCT
VVO_S00018	GGATT	AATCC	17371	17397	27	1	TTGGATTGGATGGGATTGGATTGGATT
VVO_S00018	GAAT	AATG	92806	92829	24	1	GAATGAATGAATTAATGAATGAAT
VVO_S00018	ATGCA	AATGC	391103	391123	21	1	ATGCAGATGCAATGCAATGCA
VVO_S00018	CAAGCA	AAGCAC	511312	511337	26	1	CAAGCACAAGCACAAGCACAGGCACA
VVO_S00018	CTC	AGG	614448	614468	21	1	TCCTCTCTCCTCCTCCTCCTC
VVO_S00018	GGAT	ATCC	17338	17358	21	0	GGATGGATGGATGGATGGATG
VVO_S00018	ACGTTC	AACGTG	19666	19684	19	0	ACGTTCACGTTCACGTTCA
VVO_S00018	CGCGT	ACGCG	23970	23984	15	0	CGCGTCGCGTCGCGT
VVO_S00018	AGAAC	AACAG	49377	49396	20	0	AGAACAGAACAGAACAGAAC
VVO_S00018	ACG	ACG	55680	55694	15	0	ACGACGACGACGACG
VVO_S00018	GGCGAG	AGGGCG	56504	56521	18	0	GGCGAGGGCGAGGGCGAG
VVO_S00018	CGACTG	ACTGCG	57052	57070	19	0	CGACTGCGACTGCGACTGC
VVO_S00018	GATGC	ATCGC	92235	92252	18	0	GATGCGATGCGATGCGAT
VVO_S00018	TCTCC	AGAGG	92565	92583	19	0	TCTCCTCTCCTCTCCTCTC
VVO_S00018	CAC	ACC	101562	101576	15	0	CACCACCACCACCAC
VVO_S00018	AACCTC	AACCTC	175213	175231	19	0	AACCTCAACCTCAACCTCA
VVO_S00018	TGTGC	ACAGC	196830	196845	16	0	TGTGCTGTGCTGTGCT
VVO_S00018	TGCTCC	AGCAGG	226533	226551	19	0	TGCTCCTGCTCCTGCTCCT
VVO_S00018	GAGG	AGGG	330138	330152	15	0	GAGGGAGGGAGGGAG
VVO_S00018	GAT	ATC	401113	401129	17	0	GATGATGATGATGATGA
VVO_S00018	CGC	CCG	402597	402611	15	0	CGCCGCCGCCGCCGC
VVO_S00018	CAG	AGC	402886	402903	18	0	CAGCAGCAGCAGCAGCAG
VVO_S00018	AGGT	ACCT	438037	438054	18	0	AGGTAGGTAGGTAGGTAG
VVO_S00018	GATGTC	ATCGAC	456578	456596	19	0	GATGTCGATGTCGATGTCG
VVO_S00018	CAT	ATC	457516	457531	16	0	CATCATCATCATCATC
VVO_S00018	CTG	AGC	462268	462282	15	0	CTGCTGCTGCTGCTG
VVO_S00018	CTGCCG	AGCGGC	463139	463156	18	0	CTGCCGCTGCCGCTGCCG
VVO_S00018	TGA	ATC	471465	471481	17	0	TGATGATGATGATGATG
VVO_S00018	TGTGGA	ATCCAC	495108	495126	19	0	TGTGGATGTGGATGTGGAT
VVO_S00018	GGGTGA	ACCCTC	495167	495189	23	0	GGGTGAGGGTGAGGGTGAGGGTG
VVO_S00018	AGGGCG	AGGGCG	509802	509822	21	0	AGGGCGAGGGCGAGGGCGAGG
VVO_S00018	CGGCTA	ACGGCT	510917	510937	21	0	CGGCTACGGCTACGGCTACGG
VVO_S00018	AGACAA	AAAGAC	512574	512595	22	0	AGACAAAGACAAAGACAAAGAC
VVO_S00018	ATT	AAT	541805	541828	24	0	ATTATTATTATTATTATTATTATT
VVO_S00018	AACGG	AACGG	562206	562220	15	0	AACGGAACGGAACGG
VVO_S00018	AATG	AATG	573625	573642	18	0	AATGAATGAATGAATGAA
VVO_S00018	GTCGAC	ACGTCG	573912	573930	19	0	GTCGACGTCGACGTCGACG
VVO_S00018	ATCT	ATAG	608131	608149	19	0	ATCTATCTATCTATCTATC
VVO_S00018	TTATC	AAGAT	620447	620463	17	0	TTATCTTATCTTATCTT
VVO_S00018	GATAA	AAGAT	621699	621713	15	0	GATAAGATAAGATAA
VVO_S00018	GCAGGT	ACCTGC	640054	640082	29	0	GCAGGTGCAGGTGCAGGTGCAGGTGCAGG
VVO_S00018	GGT	ACC	661568	661584	17	0	GGTGGTGGTGGTGGTGG
VVO_S00018	GTG	ACC	677378	677393	16	0	GTGGTGGTGGTGGTGG
VVO_S00018	GTG	ACC	677692	677710	19	0	GTGGTGGTGGTGGTGGTGG
VVO_S00018	TGG	ACC	677932	677946	15	0	TGGTGGTGGTGGTGG
VVO_S00018	TGG	ACC	678236	678250	15	0	TGGTGGTGGTGGTGG
VVO_S00018	C	C	693179	693195	17	0	ccccccccccccccccc
VVO_S00018	GATGAG	ATCCTC	702529	702546	18	0	GATGAGGATGAGGATGAG
VVO_S00019	GTG	ACC	475561	475649	89	3	GTGGTGGTGGTGGTGGTGTTGGTGGTGGTGGTGGTGGTGGTGTTGGTGGTGGTGGTGGTGGTGGTGTTGGTGGTGGTGGTGGTGGTGGT
VVO_S00019	TGCTGG	ACCAGC	574989	575014	26	1	TGCTGGTGCTGGTGCTGGTGTTGGTG
VVO_S00019	GGTACT	ACTGGT	712829	712856	28	1	GGTACTGGTACTGGTACTGGTTCTGGTA
VVO_S00019	GGTGTT	AACACC	31298	31319	22	0	GGTGTTGGTGTTGGTGTTGGTG
VVO_S00019	CGA	ACG	42323	42338	16	0	CGACGACGACGACGAC
VVO_S00019	CCTCCA	ACCTCC	59552	59569	18	0	CCTCCACCTCCACCTCCA
VVO_S00019	CTCGGA	ACTCGG	72339	72356	18	0	CTCGGACTCGGACTCGGA
VVO_S00019	GTCCGA	ACTCGG	73184	73203	20	0	GTCCGAGTCCGAGTCCGAGT
VVO_S00019	AAAG	AAAG	74347	74361	15	0	AAAGAAAGAAAGAAA
VVO_S00019	GCCACT	ACTGCC	97185	97202	18	0	GCCACTGCCACTGCCACT
VVO_S00019	GCA	AGC	97948	97962	15	0	GCAGCAGCAGCAGCA
VVO_S00019	GGT	ACC	102534	102550	17	0	GGTGGTGGTGGTGGTGG
VVO_S00019	TGGGG	ACCCC	147866	147880	15	0	TGGGGTGGGGTGGGG
VVO_S00019	TGTGA	ATCAC	152875	152892	18	0	TGTGATGTGATGTGATGT
VVO_S00019	TCTTT	AAAAG	155636	155654	19	0	TCTTTTCTTTTCTTTTCTT
VVO_S00019	CCTTCT	AAGGAG	168679	168696	18	0	CCTTCTCCTTCTCCTTCT
VVO_S00019	GGTCGT	ACCACG	173734	173753	20	0	GGTCGTGGTCGTGGTCGTGG
VVO_S00019	ACAACT	AACTAC	174999	175018	20	0	ACAACTACAACTACAACTAC
VVO_S00019	TTGCTC	AAGAGC	178493	178517	25	0	TTGCTCTTGCTCTTGCTCTTGCTCT
VVO_S00019	GCTCTG	AGAGCC	178610	178627	18	0	GCTCTGGCTCTGGCTCTG
VVO_S00019	ACT	ACT	185860	185874	15	0	ACTACTACTACTACT
VVO_S00019	GTTGTA	AACTAC	187007	187026	20	0	GTTGTAGTTGTAGTTGTAGT
VVO_S00019	AGCCAC	ACAGCC	206914	206933	20	0	AGCCACAGCCACAGCCACAG
VVO_S00019	TGACGA	ATCGTC	225141	225160	20	0	TGACGATGACGATGACGATG
VVO_S00019	TCTT	AAAG	233863	233877	15	0	TCTTTCTTTCTTTCT
VVO_S00019	ATGCA	AATGC	245929	245943	15	0	ATGCAATGCAATGCA
VVO_S00019	GGTT	AACC	247891	247905	15	0	GGTTGGTTGGTTGGT
VVO_S00019	CTCCC	AGGGG	330579	330594	16	0	CTCCCCTCCCCTCCCC
VVO_S00019	CGTTCT	AACGAG	382289	382308	20	0	CGTTCTCGTTCTCGTTCTCG
VVO_S00019	GATGC	ATCGC	384829	384847	19	0	GATGCGATGCGATGCGATG
VVO_S00019	TGAT	AATC	436236	436252	17	0	TGATTGATTGATTGATT
VVO_S00019	T	A	440828	440845	18	0	tttttttttttttttttt
VVO_S00019	TCCAC	ACTCC	444334	444349	16	0	TCCACTCCACTCCACT
VVO_S00019	GATAC	ATACG	513528	513542	15	0	GATACGATACGATAC
VVO_S00019	TGCTGT	AACAGC	548188	548207	20	0	TGCTGTTGCTGTTGCTGTTG
VVO_S00019	CGC	CCG	551049	551064	16	0	CGCCGCCGCCGCCGCC
VVO_S00019	GGTT	AACC	630739	630753	15	0	GGTTGGTTGGTTGGT
VVO_S00019	CAT	ATC	637505	637519	15	0	CATCATCATCATCAT
VVO_S00019	ACC	ACC	646423	646449	27	0	ACCACCACCACCACCACCACCACCACC
VVO_S00019	TGCGGG	ACCCGC	669290	669314	25	0	TGCGGGTGCGGGTGCGGGTGCGGGT
VVO_S00019	ATCAGC	ATCAGC	687829	687846	18	0	ATCAGCATCAGCATCAGC
VVO_S00019	TAATC	AATCT	701770	701785	16	0	TAATCTAATCTAATCT
VVO_S00019	CACGA	ACACG	708658	708672	15	0	CACGACACGACACGA
VVO_S00019	GATTA	AATCT	712401	712416	16	0	GATTAGATTAGATTAG
VVO_S00019	TA	AT	712533	712552	20	0	TATATATATATATATATATA
VVO_S00019	TGGTGC	ACCAGC	712888	712915	28	0	TGGTGCTGGTGCTGGTGCTGGTGCTGGT
VVO_S00020	TAGAT	AATCT	54032	54052	21	1	TAGATTAGATTAGATCAGATT
VVO_S00020	TGATGG	ATCACC	233780	233809	30	1	TGATGGATGATGGTGATGGTGATGGTGATG
VVO_S00020	TGC	AGC	234458	234479	22	1	CTGCTGCTTGCTGCTGCTGCTG
VVO_S00020	ATG	ATC	306419	306440	22	1	ATGATGATGCTGATGATGATGA
VVO_S00020	CTC	AGG	609379	609403	25	1	CTCCTCCTCTTCCTCCTCCTCCTCC
VVO_S00020	AAGA	AAAG	621699	621718	20	1	AAAGAAAGAAGAAAGAAAGA
VVO_S00020	A	A	2127	2146	20	0	aaaaaaaaaaaaaaaaaaaa
VVO_S00020	A	A	2147	2164	18	0	AAAAAAAAAAAAAAAAAA
VVO_S00020	AAATA	AAAAT	15940	15960	21	0	AAATAAAATAAAATAAAATAA
VVO_S00020	CGTGGT	ACCACG	27510	27530	21	0	CGTGGTCGTGGTCGTGGTCGT
VVO_S00020	ATGC	ATGC	46761	46775	15	0	ATGCATGCATGCATG
VVO_S00020	TTCTC	AAGAG	48839	48853	15	0	TTCTCTTCTCTTCTC
VVO_S00020	GAC	ACG	95798	95812	15	0	GACGACGACGACGAC
VVO_S00020	ACG	ACG	95844	95863	20	0	ACGACGACGACGACGACGAC
VVO_S00020	T	A	96533	96550	18	0	tttttttttttttttttt
VVO_S00020	CAAAA	AAAAC	116700	116714	15	0	CAAAACAAAACAAAA
VVO_S00020	AAGAC	AAGAC	116876	116890	15	0	AAGACAAGACAAGAC
VVO_S00020	GGGAAC	AACGGG	125660	125685	26	0	GGGAACGGGAACGGGAACGGGAACGG
VVO_S00020	AAAT	AAAT	181048	181070	23	0	AAATAAATAAATAAATAAATAAA
VVO_S00020	TCCATG	ATGTCC	216415	216432	18	0	TCCATGTCCATGTCCATG
VVO_S00020	TGGCGG	ACCGCC	219103	219120	18	0	TGGCGGTGGCGGTGGCGG
VVO_S00020	TTTTC	AAAAG	227156	227172	17	0	TTTTCTTTTCTTTTCTT
VVO_S00020	AGATT	AATCT	227210	227225	16	0	AGATTAGATTAGATTA
VVO_S00020	ATGAAG	AAGATG	241083	241101	19	0	ATGAAGATGAAGATGAAGA
VVO_S00020	TGA	ATC	241147	241163	17	0	TGATGATGATGATGATG
VVO_S00020	AATTG	AATTC	296076	296090	15	0	AATTGAATTGAATTG
VVO_S00020	TGG	ACC	300487	300504	18	0	TGGTGGTGGTGGTGGTGG
VVO_S00020	GAGAGG	AGAGGG	301145	301168	24	0	GAGAGGGAGAGGGAGAGGGAGAGG
VVO_S00020	AGGCA	AAGGC	307618	307633	16	0	AGGCAAGGCAAGGCAA
VVO_S00020	GGT	ACC	322113	322128	16	0	GGTGGTGGTGGTGGTG
VVO_S00020	TCATC	ATCTC	328579	328595	17	0	TCATCTCATCTCATCTC
VVO_S00020	GCT	AGC	354199	354217	19	0	GCTGCTGCTGCTGCTGCTG
VVO_S00020	GTGGAA	AAGTGG	355655	355672	18	0	GTGGAAGTGGAAGTGGAA
VVO_S00020	TTTTC	AAAAG	363208	363224	17	0	TTTTCTTTTCTTTTCTT
VVO_S00020	GATGAC	ATCGTC	379602	379624	23	0	GATGACGATGACGATGACGATGA
VVO_S00020	TCT	AAG	381765	381781	17	0	TCTTCTTCTTCTTCTTC
VVO_S00020	G	C	395183	395197	15	0	ggggggggggggggg
VVO_S00020	CAAGGG	AAGGGC	400102	400123	22	0	CAAGGGCAAGGGCAAGGGCAAG
VVO_S00020	AGTGCC	ACTGGC	400865	400884	20	0	AGTGCCAGTGCCAGTGCCAG
VVO_S00020	GATGA	ATCTC	404565	404579	15	0	GATGAGATGAGATGA
VVO_S00020	CAGCT	AGCTC	404791	404805	15	0	CAGCTCAGCTCAGCT
VVO_S00020	ACC	ACC	407180	407197	18	0	ACCACCACCACCACCACC
VVO_S00020	ACGCCT	ACGCCT	408400	408419	20	0	ACGCCTACGCCTACGCCTAC
VVO_S00020	CCA	ACC	408494	408508	15	0	CCACCACCACCACCA
VVO_S00020	GACGGG	ACGGGG	408708	408727	20	0	GACGGGGACGGGGACGGGGA
VVO_S00020	GAGCAT	ATGAGC	408739	408758	20	0	GAGCATGAGCATGAGCATGA
VVO_S00020	CAACAC	AACACC	411609	411627	19	0	CAACACCAACACCAACACC
VVO_S00020	CCA	ACC	412120	412134	15	0	CCACCACCACCACCA
VVO_S00020	CGA	ACG	413300	413316	17	0	CGACGACGACGACGACG
VVO_S00020	GCCTCT	AGAGGC	431318	431335	18	0	GCCTCTGCCTCTGCCTCT
VVO_S00020	CGGAGT	ACTCCG	458193	458210	18	0	CGGAGTCGGAGTCGGAGT
VVO_S00020	TCCT	AAGG	462460	462475	16	0	TCCTTCCTTCCTTCCT
VVO_S00020	TCGTC	ACGAG	462739	462754	16	0	TCGTCTCGTCTCGTCT
VVO_S00020	TCG	ACG	475268	475282	15	0	TCGTCGTCGTCGTCG
VVO_S00020	TGGTGA	ATCACC	514328	514347	20	0	TGGTGATGGTGATGGTGATG
VVO_S00020	TTA	AAT	545815	545830	16	0	TTATTATTATTATTAT
VVO_S00020	TGATA	ATATC	547953	547967	15	0	TGATATGATATGATA
VVO_S00020	GAC	ACG	591568	591583	16	0	GACGACGACGACGACG
VVO_S00020	AAATA	AAAAT	596437	596454	18	0	AAATAAAATAAAATAAAA
VVO_S00020	TCG	ACG	605184	605204	21	0	TCGTCGTCGTCGTCGTCGTCG
VVO_S00020	AAAAAT	AAAAAT	607830	607852	23	0	AAAAaTAAAAaTAAAAaTAAAAa
VVO_S00020	TCCCTC	AGAGGG	610514	610534	21	0	TCCCTCTCCCTCTCCCTCTCC
VVO_S00020	GAAGAG	AAGAGG	610844	610862	19	0	GAAGAGGAAGAGGAAGAGG
VVO_S00020	TTATTT	AAAAAT	646709	646726	18	0	TTATTTTTATTTTTATTT
VVO_S00020	GATAA	AAGAT	664877	664891	15	0	GATAAGATAAGATAA
VVO_S00021	CT	AG	61135	61175	41	4	CTCTCTCTCTCTCGTCTCTCTTCTTTCTCTCGTCTCTCTCT
VVO_S00021	AGAGAC	ACAGAG	412346	412386	41	3	AGAGAAAGAGATAGAGATAGAGACAGAGACAGAGACAGAGA
VVO_S00021	TGGTGT	AACACC	230845	230882	38	2	TGGTGTTGGTGTTGGTGTTGGTGTTGAAGTTGGTGTTG
VVO_S00021	CTTT	AAAG	385973	385994	22	1	CTTTCTTTCTTTCCTTCTTTCT
VVO_S00021	AT	AT	4775	4793	19	0	ATATATATATATATATATA
VVO_S00021	GATGAG	ATCCTC	9514	9533	20	0	GATGAGGATGAGGATGAGGA
VVO_S00021	T	A	20097	20122	26	0	tttttttttttttttttttttttttt
VVO_S00021	CGAGGA	ACGAGG	50010	50031	22	0	CGAGGACGAGGACGAGGACGAG
VVO_S00021	ATCTC	ATCTC	54295	54310	16	0	ATCTCATCTCATCTCA
VVO_S00021	ATTCC	AATGG	113113	113127	15	0	ATTCCATTCCATTCC
VVO_S00021	GAGAAG	AAGGAG	113938	113955	18	0	GAGAAGGAGAAGGAGAAG
VVO_S00021	AAGGAG	AAGGAG	114043	114060	18	0	AAGGAGAAGGAGAAGGAG
VVO_S00021	TTTG	AAAC	137505	137519	15	0	TTTGTTTGTTTGTTT
VVO_S00021	CAC	ACC	138535	138551	17	0	CACCACCACCACCACCA
VVO_S00021	TCG	ACG	169819	169838	20	0	TCGTCGTCGTCGTCGTCGTC
VVO_S00021	AATGA	AAATG	180980	180994	15	0	AATGAAATGAAATGA
VVO_S00021	GGATGA	ATCCTC	267529	267546	18	0	GGATGAGGATGAGGATGA
VVO_S00021	GATGAA	AAGATG	298566	298583	18	0	GATGAAGATGAAGATGAA
VVO_S00021	CGCAAT	AATCGC	312351	312369	19	0	CGCAATCGCAATCGCAATC
VVO_S00021	CAGAG	AGAGC	328930	328944	15	0	CAGAGCAGAGCAGAG
VVO_S00021	CAATCG	AATCGC	331506	331523	18	0	CAATCGCAATCGCAATCG
VVO_S00021	GGT	ACC	420141	420155	15	0	GGTGGTGGTGGTGGT
VVO_S00021	AACACG	AACACG	522402	522419	18	0	AACACGAACACGAACACG
VVO_S00021	GGATGA	ATCCTC	614379	614399	21	0	GGATGAGGATGAGGATGAGGA
VVO_S00021	ACAGGG	ACAGGG	614499	614516	18	0	ACAGGGACAGGGACAGGG
VVO_S00021	GAAGGA	AAGGAG	615220	615238	19	0	GAAGGAGAAGGAGAAGGAG
VVO_S00021	GAAGGA	AAGGAG	615979	615997	19	0	GAAGGAGAAGGAGAAGGAG
VVO_S00021	AGATT	AATCT	640274	640289	16	0	AGATTAGATTAGATTA
VVO_S00022	TACAG	ACAGT	186675	186697	23	1	AGTACATACAGTACAGTACAGTA
VVO_S00022	TCC	AGG	286051	286073	23	1	CCTCCTTCCTCCTCCTCCTCCTC
VVO_S00022	AGG	AGG	497968	497992	25	1	AGGAGGAGAAGGAGGAGGAGGAGGA
VVO_S00022	TTAT	AAAT	569478	569499	22	1	TTATTTAGTTATTTATTTATTT
VVO_S00022	T	A	1231	1254	24	0	TTTTTTTTTTTTTTTTTTTTTTTT
VVO_S00022	GATAA	AAGAT	1943	1962	20	0	GATAAGATAAGATAAGATAA
VVO_S00022	GACAAG	AAGGAC	50423	50441	19	0	GACAAGGACAAGGACAAGG
VVO_S00022	CCAGAA	AACCAG	97558	97583	26	0	CCAGAACCAGAACCAGAACCAGAACC
VVO_S00022	ATGGG	ATCCC	112139	112155	17	0	ATGGGATGGGATGGGAT
VVO_S00022	GACTCG	ACTCGG	135120	135142	23	0	GACTCGGACTCGGACTCGGACTC
VVO_S00022	CACCAT	ATCACC	140756	140783	28	0	CACCATCACCATCACCATCACCATCACC
VVO_S00022	CAGCAA	AACAGC	150038	150055	18	0	CAGCAACAGCAACAGCAA
VVO_S00022	ATCGCT	ATAGCG	188436	188453	18	0	ATCGCTATCGCTATCGCT
VVO_S00022	TCG	ACG	201590	201605	16	0	TCGTCGTCGTCGTCGT
VVO_S00022	AATGA	AAATG	250716	250732	17	0	AATGAAATGAAATGAAA
VVO_S00022	TGGATT	AAATCC	291074	291093	20	0	TGGATTTGGATTTGGATTTG
VVO_S00022	GAC	ACG	303125	303144	20	0	GACGACGACGACGACGACGA
VVO_S00022	ACCAGC	ACCAGC	307132	307160	29	0	ACCAGCACCAGCACCAGCACCAGCACCAG
VVO_S00022	TCTGCT	AAGCAG	309556	309574	19	0	TCTGCTTCTGCTTCTGCTT
VVO_S00022	GCTTGA	AAGCTC	325981	325998	18	0	GCTTGAGCTTGAGCTTGA
VVO_S00022	CCA	ACC	330601	330615	15	0	CCACCACCACCACCA
VVO_S00022	TTCTC	AAGAG	350117	350131	15	0	TTCTCTTCTCTTCTC
VVO_S00022	AACGGG	AACGGG	376473	376494	22	0	AACGGGAACGGGAACGGGAACG
VVO_S00022	CAATT	AATTC	389669	389689	21	0	CAATTCAATTCAATTCAATTC
VVO_S00022	ACTGGC	ACTGGC	389986	390011	26	0	ACTGGCACTGGCACTGGCACTGGCAC
VVO_S00022	CTTGAC	AAGGTC	413860	413883	24	0	CTTGACCTTGACCTTGACCTTGAC
VVO_S00022	CTTG	AAGC	414111	414125	15	0	CTTGCTTGCTTGCTT
VVO_S00022	AAAAG	AAAAG	417366	417381	16	0	AAAAGAAAAGAAAAGA
VVO_S00022	CTC	AGG	441331	441346	16	0	CTCCTCCTCCTCCTCC
VVO_S00022	CACT	ACTC	478170	478184	15	0	CACTCACTCACTCAC
VVO_S00022	AGGATG	ATCCTC	503086	503106	21	0	AGGATGAGGATGAGGATGAGG
VVO_S00022	TAT	AAT	510213	510229	17	0	TATTATTATTATTATTA
VVO_S00022	CTTGT	AAGAC	519945	519959	15	0	CTTGTCTTGTCTTGT
VVO_S00022	TACCC	ACCCT	521178	521192	15	0	TACCCTACCCTACCC
VVO_S00022	TTTCC	AAAGG	521432	521446	15	0	TTTCCTTTCCTTTCC
VVO_S00022	CGCAA	AACGC	524431	524445	15	0	CGCAACGCAACGCAA
VVO_S00022	TCATCC	ATCCTC	541715	541734	20	0	TCATCCTCATCCTCATCCTC
VVO_S00022	TGG	ACC	566005	566019	15	0	TGGTGGTGGTGGTGG
VVO_S00022	CGGTAT	ATACCG	573278	573297	20	0	CGGTATCGGTATCGGTATCG
VVO_S00022	CACGAC	ACCACG	577423	577440	18	0	CACGACCACGACCACGAC
VVO_S00022	GCAGGA	AGCAGG	587934	587952	19	0	GCAGGAGCAGGAGCAGGAG
VVO_S00022	TTAG	AACT	596033	596048	16	0	TTAGTTAGTTAGTTAG
VVO_S00022	TGC	AGC	601066	601088	23	0	TGCTGCTGCTGCTGCTGCTGCTG
VVO_S00022	GGTGTC	ACACCG	610577	610596	20	0	GGTGTCGGTGTCGGTGTCGG
VVO_S00022	GAGCTC	AGCTCG	622452	622470	19	0	GAGCTCGAGCTCGAGCTCG
VVO_S00022	CCA	ACC	623316	623332	17	0	CCACCACCACCACCACC
VVO_S00023	TTCTGG	AACCAG	47669	47704	36	2	CTGGTTCTGATTCTGATTCTGGTTCTGGTTCTGGTT
VVO_S00023	CATGGG	ATGCCC	222756	222788	33	2	GGGCACGGGCATGGACATGGGCATGGGCATGGG
VVO_S00023	TTTTCT	AAAAAG	336681	336718	38	2	TTTTCTTTTTCTTTTTCTTTTTCTTTTCTTTTtCTTTT
VVO_S00023	TTTTC	AAAAG	337899	337922	24	1	CTTTTCtTTTTCTTTTCTTTTCTT
VVO_S00023	GCA	AGC	499139	499163	25	1	GCAGCAGCAGCAGCAGCAGAAGCAG
VVO_S00023	AGATT	AATCT	26564	26579	16	0	AGATTAGATTAGATTA
VVO_S00023	TTGTA	AATAC	43648	43664	17	0	TTGTATTGTATTGTATT
VVO_S00023	GACAT	ATGAC	47235	47251	17	0	GACATGACATGACATGA
VVO_S00023	TTTC	AAAG	47732	47746	15	0	TTTCTTTCTTTCTTT
VVO_S00023	AGCAAC	AACAGC	68423	68444	22	0	AGCAACAGCAACAGCAACAGCA
VVO_S00023	GTGGAA	AAGTGG	137599	137623	25	0	GTGGAAGTGGAAGTGGAAGTGGAAG
VVO_S00023	CTGGCT	AGAGCC	172665	172686	22	0	CTGGCTCTGGCTCTGGCTCTGG
VVO_S00023	CTCTGG	AGAGCC	172855	172872	18	0	CTCTGGCTCTGGCTCTGG
VVO_S00023	GGAGT	ACTCC	175699	175713	15	0	GGAGTGGAGTGGAGT
VVO_S00023	CAGCAC	ACCAGC	179230	179249	20	0	CAGCACCAGCACCAGCACCA
VVO_S00023	CACCT	ACCTC	179265	179279	15	0	CACCTCACCTCACCT
VVO_S00023	AGATT	AATCT	240929	240944	16	0	AGATTAGATTAGATTA
VVO_S00023	TAATC	AATCT	241704	241719	16	0	TAATCTAATCTAATCT
VVO_S00023	TTGATT	AAAATC	290442	290462	21	0	TTGATTTTGATTTTGATTTTG
VVO_S00023	AGATT	AATCT	336758	336773	16	0	AGATTAGATTAGATTA
VVO_S00023	AGGTGA	AAGGTG	492887	492904	18	0	AGGTGAAGGTGAAGGTGA
VVO_S00023	ACG	ACG	496311	496326	16	0	ACGACGACGACGACGA
VVO_S00023	ACC	ACC	519615	519629	15	0	ACCACCACCACCACC
VVO_S00023	GTG	ACC	533892	533907	16	0	GTGGTGGTGGTGGTGG
VVO_S00023	TGG	ACC	534080	534095	16	0	TGGTGGTGGTGGTGGT
VVO_S00023	GAAGAT	AAGATG	550344	550361	18	0	GAAGATGAAGATGAAGAT
VVO_S00023	CCTCC	AGGGG	556213	556231	19	0	CCTCCCCTCCCCTCCCCTC
VVO_S00023	TGTCG	ACACG	556425	556442	18	0	TGTCGTGTCGTGTCGTGT
VVO_S00023	T	A	556491	556505	15	0	ttttttttttttttt
VVO_S00023	TTATC	AAGAT	589034	589048	15	0	TTATCTTATCTTATC
VVO_S00024	AAGGAG	AAGGAG	388496	388526	31	2	AAGGAGAAGGGAAAGGAGAAGGAGAAGGAGA
VVO_S00024	CCA	ACC	141799	141820	22	1	CCACCACCACCGCCACCACCAC
VVO_S00024	GAAGAG	AAGAGG	142690	142715	26	1	GGAAGATGAAGAGGAAGAGGAAGAGG
VVO_S00024	GGAGAG	AGAGGG	158426	158455	30	1	AGGGAGAAGGAGAGGGAGAGGGAGAGGGAG
VVO_S00024	TA	AT	170299	170320	22	1	TATATATATATATATTTATATA
VVO_S00024	GTACGA	ACTCGT	197107	197134	28	1	GAGTACGCGTACGAGTACGAGTACGAGT
VVO_S00024	TGG	ACC	219195	219215	21	1	TGGTGGTGGTGGTGATGGTGG
VVO_S00024	CCT	AGG	361822	361843	22	1	CCTCCTCCTCCTCCACCTCCTC
VVO_S00024	AGATT	AATCT	12858	12873	16	0	AGATTAGATTAGATTA
VVO_S00024	GAGAG	AGAGG	111299	111313	15	0	GAGAGGAGAGGAGAG
VVO_S00024	GCCACC	ACCGCC	112370	112388	19	0	GCCACCGCCACCGCCACCG
VVO_S00024	CGA	ACG	115082	115099	18	0	CGACGACGACGACGACGA
VVO_S00024	AGAAG	AAGAG	119341	119356	16	0	AGAAGAGAAGAGAAGA
VVO_S00024	TTTC	AAAG	131592	131607	16	0	TTTCTTTCTTTCTTTC
VVO_S00024	C	C	141070	141086	17	0	ccccccccccccccccc
VVO_S00024	GGACA	ACAGG	156207	156221	15	0	GGACAGGACAGGACA
VVO_S00024	GGTGCT	ACCAGC	158258	158277	20	0	GGTGCTGGTGCTGGTGCTGG
VVO_S00024	CCCAT	ATCCC	160391	160407	17	0	CCCATCCCATCCCATCC
VVO_S00024	TA	AT	180266	180280	15	0	TATATATATATATAT
VVO_S00024	AAATGA	AAAATG	186385	186412	28	0	AAATGAAAATGAAAATGAAAATGAAAAT
VVO_S00024	AGAGG	AGAGG	201596	201611	16	0	AGAGGAGAGGAGAGGA
VVO_S00024	GAAGAT	AAGATG	208786	208803	18	0	GAAGATGAAGATGAAGAT
VVO_S00024	TGGATT	AAATCC	223627	223652	26	0	TGGATTTGGATTTGGATTTGGATTTG
VVO_S00024	TGCG	ACGC	223662	223679	18	0	TGCGTGCGTGCGTGCGTG
VVO_S00024	CCACT	ACTCC	223906	223922	17	0	CCACTCCACTCCACTCC
VVO_S00024	CAT	ATC	276194	276208	15	0	CATCATCATCATCAT
VVO_S00024	GTTGC	AACGC	290982	290997	16	0	GTTGCGTTGCGTTGCG
VVO_S00024	ACG	ACG	291636	291659	24	0	ACGACGACGACGACGACGACGACG
VVO_S00024	AATGA	AAATG	378329	378344	16	0	AATGAAATGAAATGAA
VVO_S00024	ACGGCC	ACGGCC	422237	422257	21	0	ACGGCCACGGCCACGGCCACG
VVO_S00024	ACGGCT	ACGGCT	423292	423311	20	0	ACGGCTACGGCTACGGCTAC
VVO_S00024	CGA	ACG	424007	424023	17	0	CGACGACGACGACGACG
VVO_S00024	CAGGAG	AGCAGG	426715	426734	20	0	CAGGAGCAGGAGCAGGAGCA
VVO_S00024	AAT	AAT	476810	476824	15	0	AATAATAATAATAAT
VVO_S00024	CGCATG	ATGCGC	492715	492732	18	0	CGCATGCGCATGCGCATG
VVO_S00024	TGGT	AACC	494780	494795	16	0	TGGTTGGTTGGTTGGT
VVO_S00024	GATG	ATCC	494899	494916	18	0	GATGGATGGATGGATGGA
VVO_S00024	TTATC	AAGAT	500478	500492	15	0	TTATCTTATCTTATC
VVO_S00024	GGA	AGG	506510	506527	18	0	GGAGGAGGAGGAGGAGGA
VVO_S00024	CCTTG	AAGGC	506890	506908	19	0	CCTTGCCTTGCCTTGCCTT
VVO_S00025	CAGTG	ACTGC	371145	371167	23	1	TGCAGTACAGTGCAGTGCAGTGC
VVO_S00025	TCA	ATC	442603	442625	23	1	TCATCGTCATCATCATCATCATC
VVO_S00025	CAGAC	ACCAG	27687	27702	16	0	CAGACCAGACCAGACC
VVO_S00025	T	A	80676	80697	22	0	tttttttttttttttttttttt
VVO_S00025	GTGCTC	ACGAGC	128799	128821	23	0	GTGCTCGTGCTCGTGCTCGTGCT
VVO_S00025	GGACTC	ACTCGG	202918	202936	19	0	GGACTCGGACTCGGACTCG
VVO_S00025	TCGT	AACG	203331	203345	15	0	TCGTTCGTTCGTTCG
VVO_S00025	TATGA	ATATC	205367	205381	15	0	TATGATATGATATGA
VVO_S00025	GGTGC	ACCGC	206450	206465	16	0	GGTGCGGTGCGGTGCG
VVO_S00025	AAAT	AAAT	208478	208495	18	0	AAATAAATAAATAAATAA
VVO_S00025	GAGGTA	ACCTCT	235328	235346	19	0	GAGGTAGAGGTAGAGGTAG
VVO_S00025	TTGGCG	AACGCC	241706	241728	23	0	TTGGCGTTGGCGTTGGCGTTGGC
VVO_S00025	TCCTGC	AGCAGG	249141	249160	20	0	TCCTGCTCCTGCTCCTGCTC
VVO_S00025	TAATC	AATCT	255791	255806	16	0	TAATCTAATCTAATCT
VVO_S00025	GCGACA	ACAGCG	265001	265022	22	0	GCGACAGCGACAGCGACAGCGA
VVO_S00025	TAATC	AATCT	266751	266766	16	0	TAATCTAATCTAATCT
VVO_S00025	TAGAT	AATCT	274033	274047	15	0	TAGATTAGATTAGAT
VVO_S00025	CGTCT	ACGAG	329914	329934	21	0	CGTCTCGTCTCGTCTCGTCTC
VVO_S00025	AGAAG	AAGAG	331249	331266	18	0	AGAAGAGAAGAGAAGAGA
VVO_S00025	CGATAT	ATATCG	331370	331388	19	0	CGATATCGATATCGATATC
VVO_S00025	GTCTT	AAGAC	335713	335738	26	0	GTCTTGTCTTGTCTTGTCTTGTCTTG
VVO_S00025	TAGC	AGCT	335820	335834	15	0	TAGCTAGCTAGCTAG
VVO_S00025	CTAGAG	AGAGCT	362216	362238	23	0	CTAGAGCTAGAGCTAGAGCTAGA
VVO_S00025	TGTCT	AAGAC	362604	362623	20	0	TGTCTTGTCTTGTCTTGTCT
VVO_S00025	GGTG	ACCC	371231	371251	21	0	GGTGGGTGGGTGGGTGGGTGG
VVO_S00025	ACCG	ACCG	371606	371624	19	0	ACCGACCGACCGACCGACC
VVO_S00025	AAAG	AAAG	371732	371749	18	0	AAAGAAAGAAAGAAAGAA
VVO_S00025	TCG	ACG	388871	388886	16	0	TCGTCGTCGTCGTCGT
VVO_S00025	AGCAGA	AAGCAG	421016	421038	23	0	AGCAGAAGCAGAAGCAGAAGCAG
VVO_S00025	TTAGTA	AATACT	422725	422744	20	0	TTAGTATTAGTATTAGTATT
VVO_S00025	TCGTTG	AACGAC	443636	443654	19	0	TCGTTGTCGTTGTCGTTGT
VVO_S00025	GTGACG	ACCGTC	446426	446446	21	0	GTGACGGTGACGGTGACGGTG
VVO_S00025	GCAGTA	ACTGCT	451200	451220	21	0	GCAGTAGCAGTAGCAGTAGCA
VVO_S00025	GAGGA	AGAGG	456322	456336	15	0	GAGGAGAGGAGAGGA
VVO_S00025	TTGTC	AAGAC	502948	502963	16	0	TTGTCTTGTCTTGTCT
VVO_S00026	ATCCTC	ATCCTC	273264	273293	30	2	TCCTCATCGCTATCCTCATCCTCATCCTCA
VVO_S00026	AGCCAA	AAAGCC	23512	23536	25	1	AAGCCACAGCCAAAGCCAAAGCCAA
VVO_S00026	CGGTGC	ACCGGC	265843	265871	29	1	CGGTGCCGGTGCCGGTGCCGGTGTCGGTG
VVO_S00026	AAGAA	AAAAG	393362	393384	23	1	AAGAAAAGAAAAGAAAAaGAAAA
VVO_S00026	CCA	ACC	442539	442559	21	1	CCACCACCACCACCATCACCA
VVO_S00026	TGACCA	ATGACC	6912	6929	18	0	TGACCATGACCATGACCA
VVO_S00026	GTC	ACG	36259	36276	18	0	GTCGTCGTCGTCGTCGTC
VVO_S00026	GTG	ACC	41048	41063	16	0	GTGGTGGTGGTGGTGG
VVO_S00026	GGT	ACC	76680	76697	18	0	GGTGGTGGTGGTGGTGGT
VVO_S00026	GCAGGG	AGGGGC	102892	102912	21	0	GCAGGGGCAGGGGCAGGGGCA
VVO_S00026	GGAC	ACGG	106445	106461	17	0	GGACGGACGGACGGACG
VVO_S00026	TTCT	AAAG	118248	118265	18	0	TTCTTTCTTTCTTTCTTT
VVO_S00026	CAAAGT	AAAGTC	175370	175389	20	0	CAAAGTCAAAGTCAAAGTCA
VVO_S00026	GGT	ACC	181549	181564	16	0	GGTGGTGGTGGTGGTG
VVO_S00026	AGATT	AATCT	200310	200325	16	0	AGATTAGATTAGATTA
VVO_S00026	CAGAA	AACAG	225993	226007	15	0	CAGAACAGAACAGAA
VVO_S00026	TATGA	ATATC	233010	233026	17	0	TATGATATGATATGATA
VVO_S00026	GCAGGT	ACCTGC	244671	244689	19	0	GCAGGTGCAGGTGCAGGTG
VVO_S00026	GGGAGA	AGAGGG	264539	264564	26	0	GGGAGAGGGAGAGGGAGAGGGAGAGG
VVO_S00026	TCA	ATC	284037	284060	24	0	TCATCATCATCATCATCATCATCA
VVO_S00026	GATAA	AAGAT	331768	331782	15	0	GATAAGATAAGATAA
VVO_S00026	TAATC	AATCT	393310	393325	16	0	TAATCTAATCTAATCT
VVO_S00026	TCA	ATC	399957	399973	17	0	TCATCATCATCATCATC
VVO_S00026	TGCTAA	AATGCT	406094	406111	18	0	TGCTAATGCTAATGCTAA
VVO_S00026	CGA	ACG	430877	430891	15	0	CGACGACGACGACGA
VVO_S00026	GTCCTT	AAGGAC	478229	478246	18	0	GTCCTTGTCCTTGTCCTT
VVO_S00026	TTATC	AAGAT	492408	492422	15	0	TTATCTTATCTTATC
VVO_S00026	GAACCG	AACCGG	495771	495788	18	0	GAACCGGAACCGGAACCG
VVO_S00026	CGGGAA	AACGGG	495805	495822	18	0	CGGGAACGGGAACGGGAA
VVO_S00026	CGACA	ACACG	496343	496359	17	0	CGACACGACACGACACG
VVO_S00026	GAC	ACG	496519	496533	15	0	GACGACGACGACGAC
VVO_S00027	CAAGGT	AAGGTC	25477	25504	28	1	CAAGGCAAGGTCAAGGTCAAGGTCAAGG
VVO_S00027	GTT	AAC	93195	93216	22	1	GTTGTTGTTGTTGTTATTGTTG
VVO_S00027	AATAA	AAAAT	200847	200869	23	1	AAAATAACAATAAAATAAAATAA
VVO_S00027	GGT	ACC	348766	348789	24	1	GGTGGTGGTGGTGGTGATGGTGGT
VVO_S00027	ACC	ACC	1565	1583	19	0	ACCACCACCACCACCACCA
VVO_S00027	ACCC	ACCC	7068	7083	16	0	ACCCACCCACCCACCC
VVO_S00027	TTATC	AAGAT	28081	28095	15	0	TTATCTTATCTTATC
VVO_S00027	AGGTCG	ACCTCG	69143	69160	18	0	AGGTCGAGGTCGAGGTCG
VVO_S00027	GTT	AAC	92919	92942	24	0	GTTGTTGTTGTTGTTGTTGTTGTT
VVO_S00027	GATTG	AATCC	148736	148750	15	0	GATTGGATTGGATTG
VVO_S00027	AGCACG	ACGAGC	160251	160273	23	0	AGCACGAGCACGAGCACGAGCAC
VVO_S00027	TTCAC	AAGTG	202383	202397	15	0	TTCACTTCACTTCAC
VVO_S00027	CCACTA	ACTACC	219945	219965	21	0	CCACTACCACTACCACTACCA
VVO_S00027	TTTC	AAAG	222425	222439	15	0	TTTCTTTCTTTCTTT
VVO_S00027	GCGTTG	AACGCC	241287	241312	26	0	GCGTTGGCGTTGGCGTTGGCGTTGGC
VVO_S00027	AGGAG	AGAGG	280676	280697	22	0	AGGAGAGGAGAGGAGAGGAGAG
VVO_S00027	CTTTT	AAAAG	295628	295642	15	0	CTTTTCTTTTCTTTT
VVO_S00027	TTTGA	AAATC	303630	303648	19	0	TTTGATTTGATTTGATTTG
VVO_S00027	CTGTAG	ACAGCT	315457	315474	18	0	CTGTAGCTGTAGCTGTAG
VVO_S00027	GAT	ATC	327178	327192	15	0	GATGATGATGATGAT
VVO_S00027	ACCAGC	ACCAGC	336692	336713	22	0	ACCAGCACCAGCACCAGCACCA
VVO_S00027	GGTGCG	ACCCGC	353031	353049	19	0	GGTGCGGGTGCGGGTGCGG
VVO_S00027	GATAG	ATAGG	387031	387046	16	0	GATAGGATAGGATAGG
VVO_S00027	GTG	ACC	391371	391408	38	0	GTGGTGGTGGTGGTGGTGGTGGTGGTGGTGGTGGTGGT
VVO_S00027	GAGGTG	ACCTCC	401989	402006	18	0	GAGGTGGAGGTGGAGGTG
VVO_S00027	CCAGAT	ATCTGG	402320	402338	19	0	CCAGATCCAGATCCAGATC
VVO_S00027	ATGTA	AATGT	447172	447187	16	0	ATGTAATGTAATGTAA
VVO_S00027	ATGGTG	ATCACC	451160	451177	18	0	ATGGTGATGGTGATGGTG
VVO_S00027	TTTTCT	AAAAAG	456878	456899	22	0	TTTTCtTTTTCtTTTTCtTTTT
VVO_S00028	GGCTCC	AGCCGG	21360	21391	32	2	GGCTCCGGCTCCGGCTCCTGCTCCTGCTCCGG
VVO_S00028	GATCCA	ATCTGG	40324	40349	26	1	GATCCAGATCCAGATCCAGACCCAGA
VVO_S00028	CAC	ACC	342934	342953	20	1	CACCACCACCCCACCACCAC
VVO_S00028	CAC	ACC	9556	9571	16	0	CACCACCACCACCACC
VVO_S00028	TCC	AGG	21249	21268	20	0	TCCTCCTCCTCCTCCTCCTC
VVO_S00028	CACCTG	ACCTGC	40433	40454	22	0	CACCTGCACCTGCACCTGCACC
VVO_S00028	GGCGTT	AACGCC	40480	40511	32	0	GGCGTTGGCGTTGGCGTTGGCGTTGGCGTTGG
VVO_S00028	GTCGT	ACACG	79847	79861	15	0	GTCGTGTCGTGTCGT
VVO_S00028	GGT	ACC	92474	92490	17	0	GGTGGTGGTGGTGGTGG
VVO_S00028	TAATC	AATCT	177112	177127	16	0	TAATCTAATCTAATCT
VVO_S00028	GAGAG	AGAGG	180918	180932	15	0	GAGAGGAGAGGAGAG
VVO_S00028	GAAGG	AAGGG	256479	256493	15	0	GAAGGGAAGGGAAGG
VVO_S00028	AGATT	AATCT	260505	260519	15	0	AGATTAGATTAGATT
VVO_S00028	CCACAA	AACCAC	262278	262295	18	0	CCACAACCACAACCACAA
VVO_S00028	TGC	AGC	307933	307952	20	0	TGCTGCTGCTGCTGCTGCTG
VVO_S00028	TGC	AGC	307999	308015	17	0	TGCTGCTGCTGCTGCTG
VVO_S00028	GGTGA	ACCTC	321973	321987	15	0	GGTGAGGTGAGGTGA
VVO_S00028	GCAGGG	AGGGGC	335143	335166	24	0	GCAGGGGCAGGGGCAGGGGCAGGG
VVO_S00028	GATTC	AATCG	369440	369454	15	0	GATTCGATTCGATTC
VVO_S00028	TTCTCC	AAGGAG	373511	373532	22	0	TTCTCCTTCTCCTTCTCCTTCT
VVO_S00028	GTAGGA	ACTCCT	394114	394132	19	0	GTAGGAGTAGGAGTAGGAG
VVO_S00028	CGGCTT	AAGCCG	397972	397990	19	0	CGGCTTCGGCTTCGGCTTC
VVO_S00028	TGGGCT	AAGCCC	400636	400653	18	0	TGGGCTTGGGCTTGGGCT
VVO_S00029	TCG	ACG	245913	245933	21	1	CGTCGTCTCGTCGTCGTCGTC
VVO_S00029	CAAGGG	AAGGGC	20946	20966	21	0	CAAGGGCAAGGGCAAGGGCAA
VVO_S00029	CAC	ACC	35833	35848	16	0	CACCACCACCACCACC
VVO_S00029	CTTCA	AAGTG	56986	57005	20	0	CTTCACTTCACTTCACTTCA
VVO_S00029	CCGTCT	ACGGAG	58192	58210	19	0	CCGTCTCCGTCTCCGTCTC
VVO_S00029	CGCTT	AAGCG	99205	99219	15	0	CGCTTCGCTTCGCTT
VVO_S00029	GGTGA	ACCTC	102015	102034	20	0	GGTGAGGTGAGGTGAGGTGA
VVO_S00029	CAC	ACC	104391	104406	16	0	CACCACCACCACCACC
VVO_S00029	GAC	ACG	168634	168651	18	0	GACGACGACGACGACGAC
VVO_S00029	GTC	ACG	175903	175918	16	0	GTCGTCGTCGTCGTCG
VVO_S00029	GAAGCA	AAGCAG	183382	183401	20	0	GAAGCAGAAGCAGAAGCAGA
VVO_S00029	CAG	AGC	208370	208385	16	0	CAGCAGCAGCAGCAGC
VVO_S00029	GAGGAA	AAGAGG	211307	211332	26	0	GAGGAAGAGGAAGAGGAAGAGGAAGA
VVO_S00029	GAC	ACG	244005	244020	16	0	GACGACGACGACGACG
VVO_S00029	TGGTCC	ACCAGG	248038	248055	18	0	TGGTCCTGGTCCTGGTCC
VVO_S00029	GCGGT	ACCGC	248854	248870	17	0	GCGGTGCGGTGCGGTGC
VVO_S00029	A	A	299315	299334	20	0	aaaaaaaaaaaaaaaaaaaa
VVO_S00029	GGTGCC	ACCGGC	313145	313162	18	0	GGTGCCGGTGCCGGTGCC
VVO_S00029	GGGGTT	AACCCC	314473	314493	21	0	GGGGTTGGGGTTGGGGTTGGG
VVO_S00029	CGTCCA	ACGTCC	367657	367676	20	0	CGTCCACGTCCACGTCCACG
VVO_S00029	AGATC	ATCAG	388293	388307	15	0	AGATCAGATCAGATC
VVO_S00030	TAAAAA	AAAAAT	2671	2715	45	1	AAAATAAAAaTAAAAATAAAAATAAAAATAAAAATAAAAATAAAA
VVO_S00030	GCA	AGC	73081	73105	25	1	GCAGCAGCAACAGCAGCAGCAGCAG
VVO_S00030	AGATA	AAGAT	160114	160135	22	1	AGATAAGATAAGATAAAATAAG
VVO_S00030	GCCCCA	AGCCCC	179672	179697	26	1	AGCCCCACGCCCCAGCCCCAGCCCCA
VVO_S00030	T	A	260103	260125	23	1	ttttttttNtttttttttttttt
VVO_S00030	AGATT	AATCT	7780	7795	16	0	AGATTAGATTAGATTA
VVO_S00030	ATAGC	ATAGC	28034	28049	16	0	ATAGCATAGCATAGCA
VVO_S00030	AAGTT	AACTT	30856	30870	15	0	AAGTTAAGTTAAGTT
VVO_S00030	CCCACT	ACTCCC	40120	40140	21	0	CCCACTCCCACTCCCACTCCC
VVO_S00030	CACCAG	ACCAGC	40415	40437	23	0	CACCAGCACCAGCACCAGCACCA
VVO_S00030	CG	CG	66405	66419	15	0	CGCGCGCGCGCGCGC
VVO_S00030	TGCGG	ACCGC	68830	68844	15	0	TGCGGTGCGGTGCGG
VVO_S00030	GGACCA	ACCAGG	68867	68887	21	0	GGACCAGGACCAGGACCAGGA
VVO_S00030	CGAGA	ACGAG	116565	116579	15	0	CGAGACGAGACGAGA
VVO_S00030	AGGG	AGGG	142034	142048	15	0	AGGGAGGGAGGGAGG
VVO_S00030	TAATC	AATCT	147965	147980	16	0	TAATCTAATCTAATCT
VVO_S00030	GACGAG	ACGAGG	166641	166658	18	0	GACGAGGACGAGGACGAG
VVO_S00030	TGG	ACC	234497	234512	16	0	TGGTGGTGGTGGTGGT
VVO_S00030	CAAGCC	AAGCCC	271413	271436	24	0	CAAGCCCAAGCCCAAGCCCAAGCC
VVO_S00030	TAATC	AATCT	299345	299360	16	0	TAATCTAATCTAATCT
VVO_S00030	AAGAA	AAAAG	299397	299414	18	0	AAGAAAAGAAAAGAAAAG
VVO_S00030	TGAAT	AATTC	315570	315584	15	0	TGAATTGAATTGAAT
VVO_S00030	GAACCC	AACCCG	339469	339488	20	0	GAACCCGAACCCGAACCCGA
VVO_S00030	GAAGAT	AAGATG	340192	340209	18	0	GAAGATGAAGATGAAGAT
VVO_S00030	GCTGA	AGCTC	348030	348044	15	0	GCTGAGCTGAGCTGA
VVO_S00030	CCCTT	AAGGG	354563	354577	15	0	CCCTTCCCTTCCCTT
VVO_S00030	CTAT	ATAG	376979	376995	17	0	CTATCTATCTATCTATC
VVO_S00031	CCTCAA	AACCTC	288595	288641	47	3	CCTCAGCCTCAACCTCAACCTCAACCGCAACCTCAACCGCAACCTCA
VVO_S00031	ATCTAC	ATCTAC	85372	85414	43	2	ATCTACATCTACATCTACATCTACATCTACACCTACACCTACA
VVO_S00031	TTC	AAG	188175	188202	28	2	TCTTCTTTTTCTTCTTCTTCTTGTTCTT
VVO_S00031	GGAAGT	AAGTGG	285208	285236	29	1	GGAAGTGGAAGTGGAAGTGGGAGTGGAAG
VVO_S00031	ATCTT	AAGAT	35161	35175	15	0	ATCTTATCTTATCTT
VVO_S00031	TACTA	ATACT	83115	83129	15	0	TACTATACTATACTA
VVO_S00031	GTTGG	AACCC	98884	98901	18	0	GTTGGGTTGGGTTGGGTT
VVO_S00031	TTATC	AAGAT	116362	116376	15	0	TTATCTTATCTTATC
VVO_S00031	AGATT	AATCT	116608	116623	16	0	AGATTAGATTAGATTA
VVO_S00031	TAATC	AATCT	124417	124433	17	0	TAATCTAATCTAATCTA
VVO_S00031	TTGAT	AAATC	130645	130659	15	0	TTGATTTGATTTGAT
VVO_S00031	TTATC	AAGAT	146290	146305	16	0	TTATCTTATCTTATCT
VVO_S00031	CCGCAT	ATCCGC	170945	170963	19	0	CCGCATCCGCATCCGCATC
VVO_S00031	TCCGAG	ACTCGG	184711	184737	27	0	TCCGAGTCCGAGTCCGAGTCCGAGTCC
VVO_S00031	TCCAA	AATCC	184773	184787	15	0	TCCAATCCAATCCAA
VVO_S00031	CAG	AGC	196259	196274	16	0	CAGCAGCAGCAGCAGC
VVO_S00031	GTGCCG	ACCGGC	243994	244013	20	0	GTGCCGGTGCCGGTGCCGGT
VVO_S00031	ACGCC	ACGCC	245344	245360	17	0	ACGCCACGCCACGCCAC
VVO_S00031	GGCTCC	AGCCGG	285598	285617	20	0	GGCTCCGGCTCCGGCTCCGG
VVO_S00031	ACCTCA	AACCTC	288666	288686	21	0	ACCTCAACCTCAACCTCAACC
VVO_S00031	TTGCT	AAAGC	312203	312217	15	0	TTGCTTTGCTTTGCT
VVO_S00031	GGT	ACC	368164	368179	16	0	GGTGGTGGTGGTGGTG
VVO_S00032	CTG	AGC	1389	1415	27	2	CTGCTGCTGCTGTTGCTGTTGCTGCTG
VVO_S00032	TGGCTC	AGAGCC	256943	256969	27	1	TGGCTCTGGCTCTGGCTCCGGCTCTGG
VVO_S00032	CACTCA	ACACTC	259848	259875	28	1	CTCACACTCGCACTCACACTCACACTCA
VVO_S00032	CGT	ACG	260681	260706	26	1	CGTCGTCGTCGTCGTCGTCGCCGTCG
VVO_S00032	AGATT	AATCT	38858	38873	16	0	AGATTAGATTAGATTA
VVO_S00032	GAC	ACG	52322	52343	22	0	GACGACGACGACGACGACGACG
VVO_S00032	AAGGAC	AAGGAC	52742	52764	23	0	AAGGACAAGGACAAGGACAAGGA
VVO_S00032	CACCTC	ACCTCC	72175	72196	22	0	CACCTCCACCTCCACCTCCACC
VVO_S00032	CAGACC	ACCCAG	79707	79728	22	0	CAGACCCAGACCCAGACCCAGA
VVO_S00032	CCACA	ACACC	81033	81049	17	0	CCACACCACACCACACC
VVO_S00032	GGA	AGG	89508	89524	17	0	GGAGGAGGAGGAGGAGG
VVO_S00032	GTCATC	ATCGTC	91046	91063	18	0	GTCATCGTCATCGTCATC
VVO_S00032	ACATCA	AACATC	95934	95951	18	0	ACATCAACATCAACATCA
VVO_S00032	GTTGAC	AACGTC	96447	96464	18	0	GTTGACGTTGACGTTGAC
VVO_S00032	GACAAG	AAGGAC	96802	96822	21	0	GACAAGGACAAGGACAAGGAC
VVO_S00032	AAAGG	AAAGG	124789	124804	16	0	AAAGGAAAGGAAAGGA
VVO_S00032	CGAGGT	ACCTCG	141309	141327	19	0	CGAGGTCGAGGTCGAGGTC
VVO_S00032	GCT	AGC	206632	206646	15	0	GCTGCTGCTGCTGCT
VVO_S00032	CTCCC	AGGGG	210088	210102	15	0	CTCCCCTCCCCTCCC
VVO_S00032	TGACC	ACCTG	217019	217053	35	0	TGACCTGACCTGACCTGACCTGACCTGACCTGACC
VVO_S00032	CCCAGA	ACCCAG	220293	220312	20	0	CCCAGACCCAGACCCAGACC
VVO_S00032	GTG	ACC	256484	256499	16	0	GTGGTGGTGGTGGTGG
VVO_S00032	ACGG	ACGG	259159	259175	17	0	ACGGACGGACGGACGGA
VVO_S00032	CGTGCC	ACGGGC	259537	259554	18	0	CGTGCCCGTGCCCGTGCC
VVO_S00032	GCACGA	ACGAGC	261714	261732	19	0	GCACGAGCACGAGCACGAG
VVO_S00032	CAGACG	ACGCAG	262012	262033	22	0	CAGACGCAGACGCAGACGCAGA
VVO_S00032	ACG	ACG	262192	262211	20	0	ACGACGACGACGACGACGAC
VVO_S00032	TAATC	AATCT	290502	290517	16	0	TAATCTAATCTAATCT
VVO_S00032	GAAAA	AAAAG	290556	290575	20	0	GAAAAGAAAAGAAAAGAAAA
VVO_S00032	GTACCT	ACAGGT	308378	308395	18	0	GTACCTGTACCTGTACCT
VVO_S00032	GTG	ACC	311523	311541	19	0	GTGGTGGTGGTGGTGGTGG
VVO_S00032	GTTG	AACC	321866	321880	15	0	GTTGGTTGGTTGGTT
VVO_S00033	CAGCCT	AGCCTC	31622	31648	27	1	CAGCCCAGCCTCAGCCTCAGCCTCAGC
VVO_S00033	TTCA	AATG	63069	63093	25	1	TCATTCGTTCATTCATTCATTCATT
VVO_S00033	CTCTTT	AAAGAG	262503	262526	24	1	CTCTTCCTCTTTCTCTTTCTCTTT
VVO_S00033	GATGA	ATCTC	280969	280992	24	1	GAGATGGGATGAGATGAGATGAGA
VVO_S00033	GTGCAT	ATGTGC	281744	281770	27	1	GTGCATGTGCATGTGCATGTACATGTG
VVO_S00033	CAGCAT	ATCAGC	334446	334480	35	1	CAGCAGCAGCATCAGCATCAGCATCAGCATCAGCA
VVO_S00033	CGT	ACG	4810	4825	16	0	CGTCGTCGTCGTCGTC
VVO_S00033	ACG	ACG	8301	8317	17	0	ACGACGACGACGACGAC
VVO_S00033	AGCCAA	AAAGCC	31887	31908	22	0	AGCCAAAGCCAAAGCCAAAGCC
VVO_S00033	GAT	ATC	32512	32528	17	0	GATGATGATGATGATGA
VVO_S00033	AGATT	AATCT	37902	37917	16	0	AGATTAGATTAGATTA
VVO_S00033	AGATT	AATCT	46567	46582	16	0	AGATTAGATTAGATTA
VVO_S00033	GACG	ACGG	56669	56686	18	0	GACGGACGGACGGACGGA
VVO_S00033	GGC	CCG	57270	57286	17	0	GGCGGCGGCGGCGGCGG
VVO_S00033	CCTTT	AAAGG	62403	62431	29	0	CCTTTCCTTTCCTTTCCTTTCCTTTCCTT
VVO_S00033	GTC	ACG	62682	62696	15	0	GTCGTCGTCGTCGTC
VVO_S00033	TCCG	ACGG	63041	63058	18	0	TCCGTCCGTCCGTCCGTC
VVO_S00033	GATAT	ATATC	71936	71952	17	0	GATATGATATGATATGA
VVO_S00033	TTCG	AACG	77991	78005	15	0	TTCGTTCGTTCGTTC
VVO_S00033	GTCGGT	ACACCG	81052	81073	22	0	GTCGGTGTCGGTGTCGGTGTCG
VVO_S00033	GCA	AGC	150154	150168	15	0	GCAGCAGCAGCAGCA
VVO_S00033	AGTTGT	AACTAC	155374	155402	29	0	AGTTGTAGTTGTAGTTGTAGTTGTAGTTG
VVO_S00033	TACG	ACGT	160668	160685	18	0	TACGTACGTACGTACGTA
VVO_S00033	TCA	ATC	200548	200568	21	0	TCATCATCATCATCATCATCA
VVO_S00033	TTATC	AAGAT	203900	203915	16	0	TTATCTTATCTTATCT
VVO_S00033	GAACA	AACAG	203980	204001	22	0	GAACAGAACAGAACAGAACAGA
VVO_S00033	CCTCTC	AGAGGG	205143	205161	19	0	CCTCTCCCTCTCCCTCTCC
VVO_S00033	CCA	ACC	211195	211210	16	0	CCACCACCACCACCAC
VVO_S00033	TGAG	ACTC	226610	226627	18	0	TGAGTGAGTGAGTGAGTG
VVO_S00033	GGTTCT	AACCAG	235272	235289	18	0	GGTTCTGGTTCTGGTTCT
VVO_S00033	CACCT	ACCTC	238368	238384	17	0	CACCTCACCTCACCTCA
VVO_S00033	CCCTGT	ACAGGG	255562	255581	20	0	CCCTGTCCCTGTCCCTGTCC
VVO_S00033	CGGTAC	ACCGGT	255741	255758	18	0	CGGTACCGGTACCGGTAC
VVO_S00033	CCACTC	ACTCCC	256411	256437	27	0	CCACTCCCACTCCCACTCCCACTCCCA
VVO_S00033	CGT	ACG	256653	256673	21	0	CGTCGTCGTCGTCGTCGTCGT
VVO_S00033	TGAGCC	AGCCTG	256987	257019	33	0	TGAGCCTGAGCCTGAGCCTGAGCCTGAGCCTGA
VVO_S00033	CCA	ACC	257524	257543	20	0	CCACCACCACCACCACCACC
VVO_S00033	TGC	AGC	257561	257576	16	0	TGCTGCTGCTGCTGCT
VVO_S00033	CAG	AGC	261980	261996	17	0	CAGCAGCAGCAGCAGCA
VVO_S00033	GGGAGA	AGAGGG	262034	262053	20	0	GGGAGAGGGAGAGGGAGAGG
VVO_S00033	TTGAC	AAGTC	273123	273137	15	0	TTGACTTGACTTGAC
VVO_S00033	CTTTC	AAAGG	274601	274619	19	0	CTTTCCTTTCCTTTCCTTT
VVO_S00033	CCAC	ACCC	280367	280381	15	0	CCACCCACCCACCCA
VVO_S00033	GCAGGA	AGCAGG	306980	307003	24	0	GCAGGAGCAGGAGCAGGAGCAGGA
VVO_S00033	CTCCCC	AGGGGG	331939	331956	18	0	CTCCCCCTCCCCCTCCCC
VVO_S00033	CAAGGA	AAGGAC	332142	332161	20	0	CAAGGACAAGGACAAGGACA
VVO_S00033	TGCGGC	AGCCGC	332282	332303	22	0	TGCGGCTGCGGCTGCGGCTGCG
VVO_S00033	TGC	AGC	332792	332810	19	0	TGCTGCTGCTGCTGCTGCT
VVO_S00033	CAAGGA	AAGGAC	334137	334156	20	0	CAAGGACAAGGACAAGGACA
VVO_S00033	GCACAA	AAGCAC	334419	334436	18	0	GCACAAGCACAAGCACAA
VVO_S00033	GGT	ACC	345631	345647	17	0	GGTGGTGGTGGTGGTGG
VVO_S00033	GCTCT	AGAGC	345681	345695	15	0	GCTCTGCTCTGCTCT
VVO_S00033	CTCAGA	ACTCAG	348486	348504	19	0	CTCAGACTCAGACTCAGAC
VVO_S00034	TTC	AAG	200618	200638	21	1	TTCTTCTTCTTCGTCTTCTTC
VVO_S00034	TCACCA	ATCACC	4872	4895	24	0	TCACCATCACCATCACCATCACCA
VVO_S00034	GTCAC	ACGTC	45892	45906	15	0	GTCACGTCACGTCAC
VVO_S00034	CGA	ACG	52867	52886	20	0	CGACGACGACGACGACGACG
VVO_S00034	CTTCC	AAGGG	68041	68055	15	0	CTTCCCTTCCCTTCC
VVO_S00034	TTCAA	AATTC	96200	96214	15	0	TTCAATTCAATTCAA
VVO_S00034	GTG	ACC	109975	109997	23	0	GTGGTGGTGGTGGTGGTGGTGGT
VVO_S00034	TGGGA	ATCCC	114962	114976	15	0	TGGGATGGGATGGGA
VVO_S00034	CGAT	ATCG	119681	119695	15	0	CGATCGATCGATCGA
VVO_S00034	TGC	AGC	158920	158935	16	0	TGCTGCTGCTGCTGCT
VVO_S00034	CGAGCA	ACGAGC	184321	184339	19	0	CGAGCACGAGCACGAGCAC
VVO_S00034	C	C	196790	196808	19	0	ccccccccccccccccccc
VVO_S00034	AAAACC	AAAACC	199045	199063	19	0	AAAACCAAAACCAAAACCA
VVO_S00034	TTGGT	AAACC	230968	230982	15	0	TTGGTTTGGTTTGGT
VVO_S00034	GCC	CCG	258897	258913	17	0	GCCGCCGCCGCCGCCGC
VVO_S00034	GTGC	ACGC	302894	302908	15	0	GTGCGTGCGTGCGTG
VVO_S00034	TCCTT	AAAGG	322193	322207	15	0	TCCTTTCCTTTCCTT
VVO_S00035	TACCCA	ATACCC	148974	149027	54	5	CCCATACCCGTATCCATACCCGTACCCGTACCCATACCCATACCCATATCCATA
VVO_S00035	TCATC	ATCTC	284664	284710	47	3	TCTCATCTCATCTTTCATCTCATCTCATCTCATCTCATCCATCTCAT
VVO_S00035	GACAAC	AACGAC	125513	125551	39	2	ACGACAACGACGAAGACAACGACAACGACAACGACAACG
VVO_S00035	CCATGC	ATGCCC	253594	253631	38	2	GCCCATGCTCATGCCCATGTCCATGCCCATGCCCATGC
VVO_S00035	TGC	AGC	252558	252581	24	1	TGCTGTTGCTGCTGCTGCTGCTGC
VVO_S00035	TTTTCC	AAAAGG	5539	5562	24	0	TTTTCCTTTTCCTTTTCCTTTTCC
VVO_S00035	CAC	ACC	11051	11066	16	0	CACCACCACCACCACC
VVO_S00035	CAGCAA	AACAGC	47678	47698	21	0	CAGCAACAGCAACAGCAACAG
VVO_S00035	ATGGGC	ATGCCC	48020	48043	24	0	ATGGGCATGGGCATGGGCATGGGC
VVO_S00035	ATGGGC	ATGCCC	48935	48952	18	0	ATGGGCATGGGCATGGGC
VVO_S00035	CCGAGT	ACTCGG	63354	63383	30	0	CCGAGTCCGAGTCCGAGTCCGAGTCCGAGT
VVO_S00035	CGCACA	ACACGC	76686	76713	28	0	CGCACACGCACACGCACACGCACACGCA
VVO_S00035	CACCAG	ACCAGC	81811	81839	29	0	CACCAGCACCAGCACCAGCACCAGCACCA
VVO_S00035	TGTCG	ACACG	82720	82736	17	0	TGTCGTGTCGTGTCGTG
VVO_S00035	GTGCTG	ACCAGC	85345	85364	20	0	GTGCTGGTGCTGGTGCTGGT
VVO_S00035	GACCTG	ACCTGG	88281	88298	18	0	GACCTGGACCTGGACCTG
VVO_S00035	GCACCA	ACCAGC	97242	97269	28	0	GCACCAGCACCAGCACCAGCACCAGCAC
VVO_S00035	AGATT	AATCT	112190	112205	16	0	AGATTAGATTAGATTA
VVO_S00035	AAACC	AAACC	125400	125415	16	0	AAACCAAACCAAACCA
VVO_S00035	GAC	ACG	162525	162541	17	0	GACGACGACGACGACGA
VVO_S00035	GTCGAA	AAGTCG	162818	162836	19	0	GTCGAAGTCGAAGTCGAAG
VVO_S00035	TAATC	AATCT	223728	223743	16	0	TAATCTAATCTAATCT
VVO_S00035	AAATG	AAATG	223789	223806	18	0	AAATGAAATGAAATGAAA
VVO_S00035	TGAAA	AAATG	231451	231465	15	0	TGAAATGAAATGAAA
VVO_S00035	AAGGGC	AAGGGC	240649	240667	19	0	AAGGGCAAGGGCAAGGGCA
VVO_S00035	CCACTC	ACTCCC	241395	241421	27	0	CCACTCCCACTCCCACTCCCACTCCCA
VVO_S00035	GAGATT	AATCTC	244381	244399	19	0	GAGATTGAGATTGAGATTG
VVO_S00035	CAGGAC	ACCAGG	249261	249281	21	0	CAGGACCAGGACCAGGACCAG
VVO_S00035	AGC	AGC	250282	250298	17	0	AGCAGCAGCAGCAGCAG
VVO_S00035	CGCACC	ACCCGC	254159	254176	18	0	CGCACCCGCACCCGCACC
VVO_S00035	CCCACT	ACTCCC	254912	254932	21	0	CCCACTCCCACTCCCACTCCC
VVO_S00035	TTGCGT	AAACGC	255481	255503	23	0	TTGCGTTTGCGTTTGCGTTTGCG
VVO_S00035	ACGAG	ACGAG	258352	258370	19	0	ACGAGACGAGACGAGACGA
VVO_S00035	GTG	ACC	258793	258807	15	0	GTGGTGGTGGTGGTG
VVO_S00035	ATGAGT	ATACTC	260634	260662	29	0	ATGAGTATGAGTATGAGTATGAGTATGAG
VVO_S00035	GAGAAC	AACGAG	262250	262269	20	0	GAGAACGAGAACGAGAACGA
VVO_S00035	CTTCTC	AAGGAG	272337	272356	20	0	CTTCTCCTTCTCCTTCTCCT
VVO_S00035	AAAGAG	AAAGAG	301623	301643	21	0	AAAGAGAAAGAGAAAGAGAAA
VVO_S00036	GGT	ACC	52227	52242	16	0	GGTGGTGGTGGTGGTG
VVO_S00036	TAATC	AATCT	126883	126898	16	0	TAATCTAATCTAATCT
VVO_S00036	TCGCCC	AGGGCG	132322	132342	21	0	TCGCCCTCGCCCTCGCCCTCG
VVO_S00036	TTTCTC	AAAGAG	143288	143311	24	0	TTTCTCTTTCTCTTTCTCTTTCTC
VVO_S00036	TTTCTC	AAAGAG	143419	143436	18	0	TTTCTCTTTCTCTTTCTC
VVO_S00036	TTGGA	AATCC	145726	145742	17	0	TTGGATTGGATTGGATT
VVO_S00036	ATTGT	AATAC	177392	177406	15	0	ATTGTATTGTATTGT
VVO_S00037	ACTACC	ACTACC	124809	124852	44	2	ACTACCACTACCACTACCACTACCACTACTACCACCACTACCAC
VVO_S00037	CGT	ACG	160941	160963	23	1	CGTCGTCGCCGTCGTCGTCGTCG
VVO_S00037	CTTCT	AAGAG	9277	9291	15	0	CTTCTCTTCTCTTCT
VVO_S00037	TGAGCA	ATGAGC	47466	47488	23	0	TGAGCATGAGCATGAGCATGAGC
VVO_S00037	CCAACG	AACGCC	75002	75019	18	0	CCAACGCCAACGCCAACG
VVO_S00037	CTTCCC	AAGGGG	75177	75195	19	0	CTTCCCCTTCCCCTTCCCC
VVO_S00037	ATG	ATC	75585	75599	15	0	ATGATGATGATGATG
VVO_S00037	GGAAA	AAAGG	86729	86752	24	0	GGAAAGGAAAGGAAAGGAAAGGAA
VVO_S00037	TCCCTC	AGAGGG	89505	89524	20	0	TCCCTCTCCCTCTCCCTCTC
VVO_S00037	CGTTCT	AACGAG	89526	89548	23	0	CGTTCTCGTTCTCGTTCTCGTTC
VVO_S00037	CCG	CCG	90018	90034	17	0	CCGCCGCCGCCGCCGCC
VVO_S00037	CGAGTC	ACTCGG	92410	92428	19	0	CGAGTCCGAGTCCGAGTCC
VVO_S00037	GCTGC	AGCGC	117647	117662	16	0	GCTGCGCTGCGCTGCG
VVO_S00037	GTG	ACC	159961	159981	21	0	GTGGTGGTGGTGGTGGTGGTG
VVO_S00037	CCGCCA	ACCGCC	161204	161223	20	0	CCGCCACCGCCACCGCCACC
VVO_S00037	GGC	CCG	164898	164912	15	0	GGCGGCGGCGGCGGC
VVO_S00037	A	A	171896	171910	15	0	aaaaaaaaaaaaaaa
VVO_S00037	A	A	171911	171930	20	0	AAAAAAAAAAAAAAAAAAAA
VVO_S00037	CAAGCT	AAGCTC	192215	192234	20	0	CAAGCTCAAGCTCAAGCTCA
VVO_S00038	AAT	AAT	108477	108508	32	1	ATAATAAATAATAATAATAATAATAATAATAA
VVO_S00038	AGTGGG	ACTCCC	131694	131727	34	1	AGTGGGAGTGGGAGTGGGAGTGGGAGTGGAGTGG
VVO_S00038	GGTG	ACCC	7528	7544	17	0	GGTGGGTGGGTGGGTGG
VVO_S00038	GGT	ACC	13145	13160	16	0	GGTGGTGGTGGTGGTG
VVO_S00038	TCTTA	AAGAT	54738	54754	17	0	TCTTATCTTATCTTATC
VVO_S00038	CTTCT	AAGAG	56690	56706	17	0	CTTCTCTTCTCTTCTCT
VVO_S00038	GCG	CCG	67815	67829	15	0	GCGGCGGCGGCGGCG
VVO_S00038	AGTAGC	ACTGCT	76205	76223	19	0	AGTAGCAGTAGCAGTAGCA
VVO_S00038	G	C	77097	77111	15	0	GGGGGGGGGGGGGGG
VVO_S00038	AGGCAG	AGAGGC	85504	85521	18	0	AGGCAGAGGCAGAGGCAG
VVO_S00038	CGACCA	ACCACG	94921	94949	29	0	CGACCACGACCACGACCACGACCACGACC
VVO_S00039	TTCTCT	AAAGAG	3796	3818	23	0	TTCTCTTTCTCTTTCTCTTTCTC
VVO_S00039	TGCGGC	AGCCGC	68795	68814	20	0	TGCGGCTGCGGCTGCGGCTG
VVO_S00039	GCTGTT	AACAGC	69072	69091	20	0	GCTGTTGCTGTTGCTGTTGC
VVO_S00039	ATCTGC	ATCTGC	90518	90538	21	0	ATCTGCATCTGCATCTGCATC
VVO_S00039	CGGA	ACGG	116018	116033	16	0	CGGACGGACGGACGGA
VVO_S00039	CCCCT	AGGGG	134499	134518	20	0	CCCCTCCCCTCCCCTCCCCT
VVO_S00039	TTCA	AATG	134796	134811	16	0	TTCATTCATTCATTCA
VVO_S00039	TCGAGG	ACCTCG	139022	139041	20	0	TCGAGGTCGAGGTCGAGGTC
VVO_S00039	GGATTG	AATCCC	179253	179283	31	0	GGATTGGGATTGGGATTGGGATTGGGATTGG
VVO_S00040	GGGAGA	AGAGGG	11171	11196	26	0	GGGAGAGGGAGAGGGAGAGGGAGAGG
VVO_S00040	TTTCG	AAACG	11443	11459	17	0	TTTCGTTTCGTTTCGTT
VVO_S00040	ACGAGA	AACGAG	12253	12270	18	0	ACGAGAACGAGAACGAGA
VVO_S00040	GAC	ACG	29501	29515	15	0	GACGACGACGACGAC
VVO_S00040	GACAC	ACACG	37033	37048	16	0	GACACGACACGACACG
VVO_S00040	TGGTG	ACACC	42058	42077	20	0	TGGTGTGGTGTGGTGTGGTG
VVO_S00040	TCG	ACG	93102	93118	17	0	TCGTCGTCGTCGTCGTC
VVO_S00040	GCA	AGC	111264	111278	15	0	GCAGCAGCAGCAGCA
VVO_S00041	TTC	AAG	744	764	21	1	TTCTTCTTCTTCCTCTTCTTC
VVO_S00041	TGG	ACC	60338	60354	17	0	TGGTGGTGGTGGTGGTG
VVO_S00041	TCT	AAG	68922	68937	16	0	TCTTCTTCTTCTTCTT
VVO_S00041	GCT	AGC	88102	88119	18	0	GCTGCTGCTGCTGCTGCT
VVO_S00041	TTGGAC	AAGTCC	106168	106185	18	0	TTGGACTTGGACTTGGAC
VVO_S00041	CGT	ACG	115044	115063	20	0	CGTCGTCGTCGTCGTCGTCG
VVO_S00041	GGC	CCG	117372	117386	15	0	GGCGGCGGCGGCGGC
[truncated: 67 more rows]
