# Supplementary material for: Sequencing and Comparative Analysis of the Straw Mushroom (Volvariella volvacea) Genome
Source: PLoS One. 2013 Mar 19;8(3):e58294. doi: 10.1371/journal.pone.0058294 (PMC3602538; doi:10.1371/journal.pone.0058294)
Supplement: Table S11 — Comparative analysis of the number of CAZy families related to plant polysaccharide degradation in V. volvacea and other basidiomycetes. (XLSX) [file pone.0058294.s020.xlsx]

## Sheet: Table S11 
Table S11. Comparative analysis of the number of CAZy families related to plant polysaccharide degradation in V. volvacea and other basidiomycetes
Cellulose
Cazy family	GH1	GH3	GH5	GH6	GH7	GH12	GH45	Total
V. volvacea	3	11	17	0	14	2	0	47
C. cinerea	2	7	36	0	9	1	0	55
A. bisporus	1	6	18	0	1	2	0	28
S. commune	3	10	16	0	3	1	0	33
P. chrysosporium	2	10	15	0	10	2	0	39
S. lacrymans	3	9	15	0	3	2	0	32
P. placenta	2	7	20	0	0	2	0	31
Xyloglucan
Cazy family	GH2	GH12	GH27	GH29	GH31	GH35	GH36	GH51	GH54	GH74	GH95	Total
V. volvacea	2	2	1	0	6	4	0	3	0	1	2	21
C. cinerea	2	1	0	0	3	0	0	1	0	1	0	8
A. bisporus	2	2	3	1	6	1	0	1	0	1	1	18
S. commune	4	1	0	2	4	4	0	2	0	1	1	19
P. chrysosporium	2	2	2	0	6	3	0	2	0	4	1	22
S. lacrymans	3	2	2	1	5	3	0	1	0	1	1	19
P. placenta	5	2	2	0	7	3	0	2	0	0	2	23
Xylan
Cazy family	CE1	GH2	GH3	GH10	GH11	GH27	GH35	GH36	GH43	GH51	GH67	GH115	Total
V. volvacea	5	2	11	19	0	1	4	0	8	3	0	3	56
C. cinerea	5	2	7	6	6	0	0	0	4	1	0	1	32
A. bisporus	2	2	6	2	2	3	1	0	3	1	0	2	24
S. commune	11	4	10	5	1	0	4	0	12	2	0	2	51
P. chrysosporium	5	2	10	6	1	2	3	0	4	2	0	1	36
S. lacrymans	1	3	9	1	0	2	3	0	2	1	0	1	23
P. placenta	0	5	7	4	0	2	3	0	0	2	0	0	23
Galactomannan
Cazy family	GH2	GH5	GH26	GH27	GH35	GH36	Total
V. volvacea	2	17	0	1	4	0	24
C. cinerea	2	36	0	0	0	0	38
A. bisporus	2	18	0	3	1	0	24
S. commune	4	16	0	0	4	0	24
P. chrysosporium	2	15	0	2	3	0	22
S. lacrymans	3	15	0	2	3	0	23
P. placenta	5	20	0	2	3	0	30
Pectin
Cazy family	CE1	CE8	CE12	GH2	GH3	GH28	GH35	GH43	GH51	GH53	GH54	GH78	GH88	GH93	GH105	PL1	PL4	Total
V. volvacea	5	3	1	2	11	3	4	8	3	1	0	0	1	0	2	11	2	57
C. cinerea	5	0	1	2	7	3	0	4	1	1	0	0	1	0	0	1	2	28
A. bisporus	2	2	2	2	6	6	1	3	1	1	0	4	1	0	2	1	1	35
S. commune	11	2	2	4	10	3	4	12	2	1	0	3	1	0	2	4	3	64
P. chrysosporium	5	2	0	2	10	4	3	4	2	1	0	1	1	0	0	0	0	35
S. lacrymans	1	2	0	3	9	7	3	2	1	1	0	3	1	0	0	0	0	33
P. placenta	0	4	0	5	7	8	3	0	2	0	0	1	1	0	0	0	0	31
Starch
Cazy family	GH13	GH15	GH31	Total
V. volvacea	7	5	6	18
C. cinerea	7	4	3	14
A. bisporus	6	2	6	14
S. commune	9	3	4	16
P. chrysosporium	7	3	6	16
S. lacrymans	5	3	5	13
P. placenta	2	2	7	11
β-1,3-1,4-glucan
Cazy family	GH5	GH7	GH12	GH16	GH17	Total
V. volvacea	17	14	2	21	3	57
C. cinerea	36	9	1	26	3	75
A. bisporus	18	1	2	21	4	46
S. commune	16	3	1	30	2	52
P. chrysosporium	15	10	2	19	1	47
S. lacrymans	15	3	2	17	1	38
P. placenta	20	0	2	20	0	42
