# Supplementary material for: Sequencing and Comparative Analysis of the Straw Mushroom (Volvariella volvacea) Genome
Source: PLoS One. 2013 Mar 19;8(3):e58294. doi: 10.1371/journal.pone.0058294 (PMC3602538; doi:10.1371/journal.pone.0058294)
Supplement: Table S12 — The number of genes encoding the lignin oxidative enzymes in V. volvacea and other basidiomycetes. (XLSX) [file pone.0058294.s021.xlsx]

## Sheet: Table S12
Table S12. The number of genes encoding the lignin oxidative enzymes in V. volvacea and other basidiomycetes
species	lignin peroxidase	manganese-dependent peroxidase	laccases	versatile peroxidase
V. volvacea	0	2	11	2
C. cinerea	0	1	17	0
A. bisporus	0	2	12	0
S. commune	0	0	2	0
P. chrysosporium	10	5	0	0
P. placenta	0	0	5	0
S. lacrymans	0	0	5	0
