# Supplementary material for: Sequencing and Comparative Analysis of the Straw Mushroom (Volvariella volvacea) Genome
Source: PLoS One. 2013 Mar 19;8(3):e58294. doi: 10.1371/journal.pone.0058294 (PMC3602538; doi:10.1371/journal.pone.0058294)
Supplement: Table S18 — The genes expression of glycolysis and gluconeogenesis metabolism pathway in V. volvacea during 4 °C exposure at 2 h and 4 h. (XLSX) [file pone.0058294.s027.xlsx]

## Sheet: Table S18
Table S18. The genes expression of glycolysis and gluconeogenesis metabolism pathway in V. volvacea during 4 ºC exposure at 2h and 4h
funcation	gene	ko code	V23-2H vs V23-0H		V23-4H vs V23-0H
			log2(Fold_change)	FDR	log2(Fold_change)	FDR
pyruvate decarboxylase	VVO_00396	K01568	4.66518	4.36536e-05	2.30216	0.240512
alcohol dehydrogenase	VVO_00652	K00121	0.562368	0.322216	-0.0742195	0.943342
pyruvate dehydrogenase E1 component subunit beta	VVO_00952	K00162	2.59479	0.000569238	3.11773	3.63699e-07
enolase	VVO_01058	K01689	0.237237	0.525973	0.822349	0.00063965
phosphoglycerate kinase	VVO_01695	K00927	-0.00815877	0.951771	-0.0744159	0.619136
probable phosphoglycerate mutase	VVO_01780	K15634	-0.727139	0.632239	-0.434809	0.759434
pyruvate kinase	VVO_01805	K00873	-0.394563	0.433506	-1.1897	0.00652233
glucose-6-phosphate 1-epimerase	VVO_01894	K01792	-0.312101	0.841978	0.510743	0.640825
pyruvate dehydrogenase E2 component	VVO_01975	K00627	0.272861	0.771615	0.536622	0.450435
probable phosphoglycerate mutase	VVO_02444	K15634	NA	NA	3.78758	0.0604422
fructose-1,6-bisphosphatase I	VVO_02624	K03841	-0.455837	0.321087	0.497287	0.143897
phosphoenolpyruvate carboxykinase	VVO_03893	K01610	-0.833397	5.85695e-08	-0.409424	0.0074999
alcohol dehydrogenase	VVO_03901	K13954	0.135358	0.925994	0.221236	0.855607
acetyl-CoA synthetase	VVO_04119	K01895	0.967448	0.000113508	0.892172	0.000263869
hexokinase	VVO_04191	K00844	0.95736	0.0384832	-1.5052	0.0224897
pyruvate dehydrogenase E1 component subunit alpha	VVO_04309	K00161	1.10294	0.188405	1.7645	0.00591755
enolase	VVO_05114	K01689	-0.312101	0.631311	-0.797379	0.145435
phosphoglucomutase	VVO_05249	K01835	-0.234742	0.477827	0.48129	0.0363865
6-phosphofructokinase	VVO_05487	K00850	-0.142176	0.851688	0.193222	0.728253
aldehyde dehydrogenase	VVO_06007	K00128	-0.584495	1.43845e-05	-0.130536	0.391147
aldehyde dehydrogenase	VVO_06008	K00128	-1.60161	0.000141588	-0.742238	0.0540588
aldehyde dehydrogenase	VVO_06014	K00128	-0.229639	0.854886	-0.200344	0.843026
dihydrolipoamide dehydrogenase	VVO_06049	K00382	-0.071093	0.914446	0.0232971	1
glyceraldehyde 3-phosphate dehydrogenase	VVO_06963	K00134	-0.271747	0.000118165	0.0191436	0.864504
phosphoglucomutase	VVO_07338	K01835	2.38834	0.000874438	1.09571	0.275391
2,3-bisphosphoglycerate-independent phosphoglycerate mutase	VVO_07800	K15633	1.18266	0.00196614	0.913114	0.0221903
alcohol dehydrogenase	VVO_07905	K00002	-1.16771	0.175557	-0.267699	0.76373
fructose-bisphosphate aldolase	VVO_07975	K01623	2.59479	0.186617	3.88712	0.00300438
triosephosphate isomerase	VVO_08560	K01803	0.410365	0.340119	0.380766	0.351873
2,3-bisphosphoglycerate-dependent phosphoglycerate mutase	VVO_08896	K01834	0.495254	0.318868	-0.102234	0.888916
alcohol dehydrogenase	VVO_09144	K13953	-0.283629	0.00309003	0.0847943	0.412873
aldehyde dehydrogenase family 7 member A1	VVO_09324	K14085	-3.77153	7.87454e-06	-2.4792	0.000188388
aldehyde dehydrogenase	VVO_10274	K00128	-1.3121	0.247761	0.0957056	0.95461
hexokinase	VVO_10440	K00844	0.0664105	0.926703	0.863415	0.0109754
alcohol dehydrogenase	VVO_10513	K13953	-0.312101	0.781953	0.773777	0.238821
fructose-bisphosphate aldolase	VVO_10719	K01624	0.103391	0.567394	0.186437	0.180015
glucose-6-phosphate isomerase	VVO_10870	K01810	-0.127455	0.591378	-0.196649	0.313334
