# Supplementary material for: Sequencing and Comparative Analysis of the Straw Mushroom (Volvariella volvacea) Genome
Source: PLoS One. 2013 Mar 19;8(3):e58294. doi: 10.1371/journal.pone.0058294 (PMC3602538; doi:10.1371/journal.pone.0058294)
Supplement: Table S19 — The genes expression of unsaturated fatty acid biosynthesis pathway in V. volvacea during 4 °C exposure at 2 h and 4 h. (XLSX) [file pone.0058294.s028.xlsx]

## Sheet: Table S19
Table S19. The genes expression of unsaturated fatty acid biosynthesis pathway in V. volvacea during 4 ºC exposure at 2h and 4h
funcation	gene	ko code	V23-2H vs V23-0H		V23-4H vs V23-0H
			log2(Fold_change)	FDR	log2(Fold_change)	FDR
3-oxoacyl-[acyl-carrier protein] reductase	VVO_00127	K00059	2.48046	7.22128e-14	0.395266	0.340052
3-oxoacyl-[acyl-carrier protein] reductase	VVO_09897	K00059	3.59479	0.11247	3.98023	0.00579908
3-oxoacyl-[acyl-carrier protein] reductase	VVO_03618	K00059	1.85782	0.0839153	0.787583	0.374547
3-oxoacyl-[acyl-carrier protein] reductase	VVO_09899	K00059	-0.405211	0.807262	0.43966	0.509234
acyl-CoA oxidase	VVO_10334	K00232	1.12086	0.155915	-0.534345	0.44871
stearoyl-CoA desaturase	VVO_01210	K00507	-0.742735	0.027072	-0.25515	0.246834
acetyl-CoA acyltransferase	VVO_10684	K07513	0.472799	0.0281859	-0.614515	0.000944974
fatty acid elongase 2	VVO_01885	K10245	0.050469	0.952288	0.632305	0.194159
beta-keto reductase	VVO_03849	K10251	0.950933	0.461526	0.243263	0.780209
omega-6 fatty acid desaturase	VVO_03586	K10256	NA	NA	1.56519	0.312669
omega-6 fatty acid desaturase	VVO_00398	K10256	0.00621572	0.979445	-0.375915	0.0283853
omega-3 fatty acid desaturase	VVO_09300	K10257	NA	NA	-1.01977	0.552246
enoyl reductase	VVO_02950	K10258	0.857824	0.732294	1.78758	0.0901136
3-hydroxy acyl-CoA dehydratase	VVO_04034	K10703	-1.84262	0.109423	-0.398283	0.509778
